# Supplementary material for: Discovering the right place to check-in using web-based proximate selection
Source: Springer Nature journal article supplement (doi:10.1007/s12243-018-0692-x), 2018-12-06
Supplement: MOESM1 [file 16322450]

## Sheet: results-8
ScenarioID	PlaceID	MatrixID	MatrixPoint	MatrixPointLongitude	MatrixPointLatitude	ErrorLevel	MatrixPointLongitudeWithError	MatrixPointLatitudeWithError	RankPosition
1	ChIJ6dn6HlZYwokRBoc8ubaUPnU	7	1	-73.9832434472154	40.76135746651801	0	-73.9832434472154	40.76135746651801	10
1	ChIJ6dn6HlZYwokRBoc8ubaUPnU	7	1	-73.9832434472154	40.76135746651801	0	-73.9832434472154	40.76135746651801	10
1	ChIJ6dn6HlZYwokRBoc8ubaUPnU	7	1	-73.9832434472154	40.76135746651801	0	-73.9832434472154	40.76135746651801	10
1	ChIJ6dn6HlZYwokRBoc8ubaUPnU	7	1	-73.9832434472154	40.76135746651801	0	-73.9832434472154	40.76135746651801	10
1	ChIJ6dn6HlZYwokRBoc8ubaUPnU	7	1	-73.9832434472154	40.76135746651801	0	-73.9832434472154	40.76135746651801	10
1	ChIJ6dn6HlZYwokRBoc8ubaUPnU	7	1	-73.9832434472154	40.76135746651801	0	-73.9832434472154	40.76135746651801	10
1	ChIJ6dn6HlZYwokRBoc8ubaUPnU	7	1	-73.9832434472154	40.76135746651801	0	-73.9832434472154	40.76135746651801	10
1	ChIJ6dn6HlZYwokRBoc8ubaUPnU	7	1	-73.9832434472154	40.76135746651801	0	-73.9832434472154	40.76135746651801	10
1	ChIJ6dn6HlZYwokRBoc8ubaUPnU	7	1	-73.9832434472154	40.76135746651801	0	-73.9832434472154	40.76135746651801	10
1	ChIJ6dn6HlZYwokRBoc8ubaUPnU	7	1	-73.9832434472154	40.76135746651801	0	-73.9832434472154	40.76135746651801	10
1	ChIJ6dn6HlZYwokRBoc8ubaUPnU	7	1	-73.9832434472154	40.76135746651801	1	-73.98325213675743	40.76137646153203	10
1	ChIJ6dn6HlZYwokRBoc8ubaUPnU	7	1	-73.9832434472154	40.76135746651801	1	-73.98324753603183	40.76136266566104	10
1	ChIJ6dn6HlZYwokRBoc8ubaUPnU	7	1	-73.9832434472154	40.76135746651801	1	-73.98324734055278	40.76135815473689	10
1	ChIJ6dn6HlZYwokRBoc8ubaUPnU	7	1	-73.9832434472154	40.76135746651801	1	-73.98324628516984	40.76134859864131	9
1	ChIJ6dn6HlZYwokRBoc8ubaUPnU	7	1	-73.9832434472154	40.76135746651801	1	-73.98322477450492	40.761357124548546	9
1	ChIJ6dn6HlZYwokRBoc8ubaUPnU	7	1	-73.9832434472154	40.76135746651801	1	-73.98325040066385	40.76136004974727	10
1	ChIJ6dn6HlZYwokRBoc8ubaUPnU	7	1	-73.9832434472154	40.76135746651801	1	-73.98327134145568	40.761347159049365	9
1	ChIJ6dn6HlZYwokRBoc8ubaUPnU	7	1	-73.9832434472154	40.76135746651801	1	-73.98325428866674	40.76137054150352	10
1	ChIJ6dn6HlZYwokRBoc8ubaUPnU	7	1	-73.9832434472154	40.76135746651801	1	-73.98324297704296	40.76135868420429	10
1	ChIJ6dn6HlZYwokRBoc8ubaUPnU	7	1	-73.9832434472154	40.76135746651801	1	-73.98324413587191	40.761363448252816	10
1	ChIJ6dn6HlZYwokRBoc8ubaUPnU	7	1	-73.9832434472154	40.76135746651801	2	-73.98324248999347	40.76136006920484	10
1	ChIJ6dn6HlZYwokRBoc8ubaUPnU	7	1	-73.9832434472154	40.76135746651801	2	-73.98360519644989	40.76104962843288	0
1	ChIJ6dn6HlZYwokRBoc8ubaUPnU	7	1	-73.9832434472154	40.76135746651801	2	-73.98324258703408	40.76135094898517	9
1	ChIJ6dn6HlZYwokRBoc8ubaUPnU	7	1	-73.9832434472154	40.76135746651801	2	-73.98299704096024	40.76190035032486	0
1	ChIJ6dn6HlZYwokRBoc8ubaUPnU	7	1	-73.9832434472154	40.76135746651801	2	-73.98321066862037	40.761321221981206	6
1	ChIJ6dn6HlZYwokRBoc8ubaUPnU	7	1	-73.9832434472154	40.76135746651801	2	-73.98323138280266	40.761339767904616	8
1	ChIJ6dn6HlZYwokRBoc8ubaUPnU	7	1	-73.9832434472154	40.76135746651801	2	-73.98289040100315	40.761478265846726	0
1	ChIJ6dn6HlZYwokRBoc8ubaUPnU	7	1	-73.9832434472154	40.76135746651801	2	-73.98313963655177	40.76145947910185	0
1	ChIJ6dn6HlZYwokRBoc8ubaUPnU	7	1	-73.9832434472154	40.76135746651801	2	-73.98346528523501	40.76153315135825	0
1	ChIJ6dn6HlZYwokRBoc8ubaUPnU	7	1	-73.9832434472154	40.76135746651801	2	-73.98357344485657	40.76076875528768	0
1	ChIJ6dn6HlZYwokRBoc8ubaUPnU	7	1	-73.9832434472154	40.76135746651801	3	-73.98324243591166	40.7613476793552	8
1	ChIJ6dn6HlZYwokRBoc8ubaUPnU	7	1	-73.9832434472154	40.76135746651801	3	-73.98324740964154	40.76135152051833	9
1	ChIJ6dn6HlZYwokRBoc8ubaUPnU	7	1	-73.9832434472154	40.76135746651801	3	-73.98325473145714	40.76130177406474	7
1	ChIJ6dn6HlZYwokRBoc8ubaUPnU	7	1	-73.9832434472154	40.76135746651801	3	-73.98313364924063	40.76133477102246	5
1	ChIJ6dn6HlZYwokRBoc8ubaUPnU	7	1	-73.9832434472154	40.76135746651801	3	-73.98323450626383	40.76137405973389	10
1	ChIJ6dn6HlZYwokRBoc8ubaUPnU	7	1	-73.9832434472154	40.76135746651801	3	-73.98322823320392	40.761353789490684	8
1	ChIJ6dn6HlZYwokRBoc8ubaUPnU	7	1	-73.9832434472154	40.76135746651801	3	-73.98325063232441	40.76132780396364	8
1	ChIJ6dn6HlZYwokRBoc8ubaUPnU	7	1	-73.9832434472154	40.76135746651801	3	-73.98318033503004	40.7614634759904	0
1	ChIJ6dn6HlZYwokRBoc8ubaUPnU	7	1	-73.9832434472154	40.76135746651801	3	-73.98324262415753	40.76135533242262	10
1	ChIJ6dn6HlZYwokRBoc8ubaUPnU	7	1	-73.9832434472154	40.76135746651801	3	-73.9832476279695	40.7613204472232	7
1	ChIJ6dn6HlZYwokRBoc8ubaUPnU	7	2	-73.9829467	40.76135746689804	0	-73.9829467	40.76135746689804	3
1	ChIJ6dn6HlZYwokRBoc8ubaUPnU	7	2	-73.9829467	40.76135746689804	0	-73.9829467	40.76135746689804	3
1	ChIJ6dn6HlZYwokRBoc8ubaUPnU	7	2	-73.9829467	40.76135746689804	0	-73.9829467	40.76135746689804	3
1	ChIJ6dn6HlZYwokRBoc8ubaUPnU	7	2	-73.9829467	40.76135746689804	0	-73.9829467	40.76135746689804	3
1	ChIJ6dn6HlZYwokRBoc8ubaUPnU	7	2	-73.9829467	40.76135746689804	0	-73.9829467	40.76135746689804	3
1	ChIJ6dn6HlZYwokRBoc8ubaUPnU	7	2	-73.9829467	40.76135746689804	0	-73.9829467	40.76135746689804	3
1	ChIJ6dn6HlZYwokRBoc8ubaUPnU	7	2	-73.9829467	40.76135746689804	0	-73.9829467	40.76135746689804	3
1	ChIJ6dn6HlZYwokRBoc8ubaUPnU	7	2	-73.9829467	40.76135746689804	0	-73.9829467	40.76135746689804	3
1	ChIJ6dn6HlZYwokRBoc8ubaUPnU	7	2	-73.9829467	40.76135746689804	0	-73.9829467	40.76135746689804	3
1	ChIJ6dn6HlZYwokRBoc8ubaUPnU	7	2	-73.9829467	40.76135746689804	0	-73.9829467	40.76135746689804	3
1	ChIJ6dn6HlZYwokRBoc8ubaUPnU	7	2	-73.9829467	40.76135746689804	1	-73.9829641340453	40.761358139051644	3
1	ChIJ6dn6HlZYwokRBoc8ubaUPnU	7	2	-73.9829467	40.76135746689804	1	-73.98294209412299	40.76135252954368	3
1	ChIJ6dn6HlZYwokRBoc8ubaUPnU	7	2	-73.9829467	40.76135746689804	1	-73.9829493032034	40.761353517158845	3
1	ChIJ6dn6HlZYwokRBoc8ubaUPnU	7	2	-73.9829467	40.76135746689804	1	-73.98294575280205	40.76136054173357	3
1	ChIJ6dn6HlZYwokRBoc8ubaUPnU	7	2	-73.9829467	40.76135746689804	1	-73.98294894985004	40.76135021515245	3
1	ChIJ6dn6HlZYwokRBoc8ubaUPnU	7	2	-73.9829467	40.76135746689804	1	-73.98296492076699	40.76136006459413	3
1	ChIJ6dn6HlZYwokRBoc8ubaUPnU	7	2	-73.9829467	40.76135746689804	1	-73.98296467982696	40.761368610397604	4
1	ChIJ6dn6HlZYwokRBoc8ubaUPnU	7	2	-73.9829467	40.76135746689804	1	-73.98294542051	40.761362361657724	3
1	ChIJ6dn6HlZYwokRBoc8ubaUPnU	7	2	-73.9829467	40.76135746689804	1	-73.98294721606885	40.761353586085974	3
1	ChIJ6dn6HlZYwokRBoc8ubaUPnU	7	2	-73.9829467	40.76135746689804	1	-73.98294653483701	40.761356094219295	3
1	ChIJ6dn6HlZYwokRBoc8ubaUPnU	7	2	-73.9829467	40.76135746689804	2	-73.98317142552257	40.761204707617196	4
1	ChIJ6dn6HlZYwokRBoc8ubaUPnU	7	2	-73.9829467	40.76135746689804	2	-73.9828216912528	40.761600102494995	0
1	ChIJ6dn6HlZYwokRBoc8ubaUPnU	7	2	-73.9829467	40.76135746689804	2	-73.98308470860081	40.76176894880266	0
1	ChIJ6dn6HlZYwokRBoc8ubaUPnU	7	2	-73.9829467	40.76135746689804	2	-73.98280390209797	40.7613001391462	5
1	ChIJ6dn6HlZYwokRBoc8ubaUPnU	7	2	-73.9829467	40.76135746689804	2	-73.98290458555853	40.76136728334707	5
1	ChIJ6dn6HlZYwokRBoc8ubaUPnU	7	2	-73.9829467	40.76135746689804	2	-73.98241926150432	40.76179774617163	0
1	ChIJ6dn6HlZYwokRBoc8ubaUPnU	7	2	-73.9829467	40.76135746689804	2	-73.98291334154374	40.7612166420041	2
1	ChIJ6dn6HlZYwokRBoc8ubaUPnU	7	2	-73.9829467	40.76135746689804	2	-73.98299097574625	40.76136008101223	4
1	ChIJ6dn6HlZYwokRBoc8ubaUPnU	7	2	-73.9829467	40.76135746689804	2	-73.98330977166323	40.76127294801922	15
1	ChIJ6dn6HlZYwokRBoc8ubaUPnU	7	2	-73.9829467	40.76135746689804	2	-73.98280199053937	40.76134088481635	20
1	ChIJ6dn6HlZYwokRBoc8ubaUPnU	7	2	-73.9829467	40.76135746689804	3	-73.98296003972801	40.76134752323609	3
1	ChIJ6dn6HlZYwokRBoc8ubaUPnU	7	2	-73.9829467	40.76135746689804	3	-73.98304426845863	40.76130416739037	2
1	ChIJ6dn6HlZYwokRBoc8ubaUPnU	7	2	-73.9829467	40.76135746689804	3	-73.98303968618539	40.761327306069504	2
1	ChIJ6dn6HlZYwokRBoc8ubaUPnU	7	2	-73.9829467	40.76135746689804	3	-73.98291406134396	40.76137658069595	6
1	ChIJ6dn6HlZYwokRBoc8ubaUPnU	7	2	-73.9829467	40.76135746689804	3	-73.98299357106734	40.761252494609806	2
1	ChIJ6dn6HlZYwokRBoc8ubaUPnU	7	2	-73.9829467	40.76135746689804	3	-73.98307918591956	40.761472684082776	0
1	ChIJ6dn6HlZYwokRBoc8ubaUPnU	7	2	-73.9829467	40.76135746689804	3	-73.98294471953064	40.761365991111305	3
1	ChIJ6dn6HlZYwokRBoc8ubaUPnU	7	2	-73.9829467	40.76135746689804	3	-73.98296865981122	40.76137190265475	4
1	ChIJ6dn6HlZYwokRBoc8ubaUPnU	7	2	-73.9829467	40.76135746689804	3	-73.98301145490714	40.76128323207033	2
1	ChIJ6dn6HlZYwokRBoc8ubaUPnU	7	2	-73.9829467	40.76135746689804	3	-73.98296014681604	40.761372383528695	4
1	ChIJ6dn6HlZYwokRBoc8ubaUPnU	7	3	-73.9826499527846	40.76135746651801	0	-73.9826499527846	40.76135746651801	0
1	ChIJ6dn6HlZYwokRBoc8ubaUPnU	7	3	-73.9826499527846	40.76135746651801	0	-73.9826499527846	40.76135746651801	0
1	ChIJ6dn6HlZYwokRBoc8ubaUPnU	7	3	-73.9826499527846	40.76135746651801	0	-73.9826499527846	40.76135746651801	0
1	ChIJ6dn6HlZYwokRBoc8ubaUPnU	7	3	-73.9826499527846	40.76135746651801	0	-73.9826499527846	40.76135746651801	0
1	ChIJ6dn6HlZYwokRBoc8ubaUPnU	7	3	-73.9826499527846	40.76135746651801	0	-73.9826499527846	40.76135746651801	0
1	ChIJ6dn6HlZYwokRBoc8ubaUPnU	7	3	-73.9826499527846	40.76135746651801	0	-73.9826499527846	40.76135746651801	0
1	ChIJ6dn6HlZYwokRBoc8ubaUPnU	7	3	-73.9826499527846	40.76135746651801	0	-73.9826499527846	40.76135746651801	0
1	ChIJ6dn6HlZYwokRBoc8ubaUPnU	7	3	-73.9826499527846	40.76135746651801	0	-73.9826499527846	40.76135746651801	0
1	ChIJ6dn6HlZYwokRBoc8ubaUPnU	7	3	-73.9826499527846	40.76135746651801	0	-73.9826499527846	40.76135746651801	0
1	ChIJ6dn6HlZYwokRBoc8ubaUPnU	7	3	-73.9826499527846	40.76135746651801	0	-73.9826499527846	40.76135746651801	0
1	ChIJ6dn6HlZYwokRBoc8ubaUPnU	7	3	-73.9826499527846	40.76135746651801	1	-73.98264755137322	40.76135646768406	0
1	ChIJ6dn6HlZYwokRBoc8ubaUPnU	7	3	-73.9826499527846	40.76135746651801	1	-73.98264805217349	40.76135940859511	0
1	ChIJ6dn6HlZYwokRBoc8ubaUPnU	7	3	-73.9826499527846	40.76135746651801	1	-73.98264463435471	40.7613496320401	0
1	ChIJ6dn6HlZYwokRBoc8ubaUPnU	7	3	-73.9826499527846	40.76135746651801	1	-73.9826449553604	40.761373903337955	0
1	ChIJ6dn6HlZYwokRBoc8ubaUPnU	7	3	-73.9826499527846	40.76135746651801	1	-73.98266674278706	40.76135806849251	0
1	ChIJ6dn6HlZYwokRBoc8ubaUPnU	7	3	-73.9826499527846	40.76135746651801	1	-73.98262660786045	40.76136683588253	0
1	ChIJ6dn6HlZYwokRBoc8ubaUPnU	7	3	-73.9826499527846	40.76135746651801	1	-73.98264119126121	40.7613450298235	0
1	ChIJ6dn6HlZYwokRBoc8ubaUPnU	7	3	-73.9826499527846	40.76135746651801	1	-73.98264940175923	40.761333587119935	0
1	ChIJ6dn6HlZYwokRBoc8ubaUPnU	7	3	-73.9826499527846	40.76135746651801	1	-73.98264186604251	40.76135155242272	0
1	ChIJ6dn6HlZYwokRBoc8ubaUPnU	7	3	-73.9826499527846	40.76135746651801	1	-73.98265340778751	40.76135751053407	0
1	ChIJ6dn6HlZYwokRBoc8ubaUPnU	7	3	-73.9826499527846	40.76135746651801	2	-73.98284658132386	40.76116590460605	3
1	ChIJ6dn6HlZYwokRBoc8ubaUPnU	7	3	-73.9826499527846	40.76135746651801	2	-73.98262015743316	40.76135311986425	0
1	ChIJ6dn6HlZYwokRBoc8ubaUPnU	7	3	-73.9826499527846	40.76135746651801	2	-73.98302534155368	40.76113837895907	1
1	ChIJ6dn6HlZYwokRBoc8ubaUPnU	7	3	-73.9826499527846	40.76135746651801	2	-73.98254557926305	40.76132065175246	0
1	ChIJ6dn6HlZYwokRBoc8ubaUPnU	7	3	-73.9826499527846	40.76135746651801	2	-73.98329044794086	40.76138703807631	0
1	ChIJ6dn6HlZYwokRBoc8ubaUPnU	7	3	-73.9826499527846	40.76135746651801	2	-73.982550628397	40.76128504687805	0
1	ChIJ6dn6HlZYwokRBoc8ubaUPnU	7	3	-73.9826499527846	40.76135746651801	2	-73.982530425233	40.76142523797974	0
1	ChIJ6dn6HlZYwokRBoc8ubaUPnU	7	3	-73.9826499527846	40.76135746651801	2	-73.98192644127025	40.76122313093253	0
1	ChIJ6dn6HlZYwokRBoc8ubaUPnU	7	3	-73.9826499527846	40.76135746651801	2	-73.98269133507893	40.76122597607184	8
1	ChIJ6dn6HlZYwokRBoc8ubaUPnU	7	3	-73.9826499527846	40.76135746651801	2	-73.98297545878773	40.76131017043486	3
1	ChIJ6dn6HlZYwokRBoc8ubaUPnU	7	3	-73.9826499527846	40.76135746651801	3	-73.98261616958098	40.761387632369235	0
1	ChIJ6dn6HlZYwokRBoc8ubaUPnU	7	3	-73.9826499527846	40.76135746651801	3	-73.98265702699841	40.7613003270076	0
1	ChIJ6dn6HlZYwokRBoc8ubaUPnU	7	3	-73.9826499527846	40.76135746651801	3	-73.98276967306168	40.76140450703887	0
1	ChIJ6dn6HlZYwokRBoc8ubaUPnU	7	3	-73.9826499527846	40.76135746651801	3	-73.98260397766741	40.761384434115286	0
1	ChIJ6dn6HlZYwokRBoc8ubaUPnU	7	3	-73.9826499527846	40.76135746651801	3	-73.9826481240364	40.761357517251525	0
1	ChIJ6dn6HlZYwokRBoc8ubaUPnU	7	3	-73.9826499527846	40.76135746651801	3	-73.98269283086876	40.76138604507194	0
1	ChIJ6dn6HlZYwokRBoc8ubaUPnU	7	3	-73.9826499527846	40.76135746651801	3	-73.98273820011576	40.761446378040176	0
1	ChIJ6dn6HlZYwokRBoc8ubaUPnU	7	3	-73.9826499527846	40.76135746651801	3	-73.9825393323217	40.76132261742166	0
1	ChIJ6dn6HlZYwokRBoc8ubaUPnU	7	3	-73.9826499527846	40.76135746651801	3	-73.98264260488229	40.76143155871751	0
1	ChIJ6dn6HlZYwokRBoc8ubaUPnU	7	3	-73.9826499527846	40.76135746651801	3	-73.98265802988938	40.76134977967161	0
1	ChIJ6dn6HlZYwokRBoc8ubaUPnU	7	4	-73.98324344621193	40.76113269961997	0	-73.98324344621193	40.76113269961997	5
1	ChIJ6dn6HlZYwokRBoc8ubaUPnU	7	4	-73.98324344621193	40.76113269961997	0	-73.98324344621193	40.76113269961997	5
1	ChIJ6dn6HlZYwokRBoc8ubaUPnU	7	4	-73.98324344621193	40.76113269961997	0	-73.98324344621193	40.76113269961997	5
1	ChIJ6dn6HlZYwokRBoc8ubaUPnU	7	4	-73.98324344621193	40.76113269961997	0	-73.98324344621193	40.76113269961997	5
1	ChIJ6dn6HlZYwokRBoc8ubaUPnU	7	4	-73.98324344621193	40.76113269961997	0	-73.98324344621193	40.76113269961997	5
1	ChIJ6dn6HlZYwokRBoc8ubaUPnU	7	4	-73.98324344621193	40.76113269961997	0	-73.98324344621193	40.76113269961997	5
1	ChIJ6dn6HlZYwokRBoc8ubaUPnU	7	4	-73.98324344621193	40.76113269961997	0	-73.98324344621193	40.76113269961997	5
1	ChIJ6dn6HlZYwokRBoc8ubaUPnU	7	4	-73.98324344621193	40.76113269961997	0	-73.98324344621193	40.76113269961997	5
1	ChIJ6dn6HlZYwokRBoc8ubaUPnU	7	4	-73.98324344621193	40.76113269961997	0	-73.98324344621193	40.76113269961997	5
1	ChIJ6dn6HlZYwokRBoc8ubaUPnU	7	4	-73.98324344621193	40.76113269961997	0	-73.98324344621193	40.76113269961997	5
1	ChIJ6dn6HlZYwokRBoc8ubaUPnU	7	4	-73.98324344621193	40.76113269961997	1	-73.98324534811994	40.76113575562327	5
1	ChIJ6dn6HlZYwokRBoc8ubaUPnU	7	4	-73.98324344621193	40.76113269961997	1	-73.98324428189181	40.76113237004548	5
1	ChIJ6dn6HlZYwokRBoc8ubaUPnU	7	4	-73.98324344621193	40.76113269961997	1	-73.98323710015089	40.76111512195387	5
1	ChIJ6dn6HlZYwokRBoc8ubaUPnU	7	4	-73.98324344621193	40.76113269961997	1	-73.98323915086574	40.76111773978081	5
1	ChIJ6dn6HlZYwokRBoc8ubaUPnU	7	4	-73.98324344621193	40.76113269961997	1	-73.98324655701376	40.76113040485423	5
1	ChIJ6dn6HlZYwokRBoc8ubaUPnU	7	4	-73.98324344621193	40.76113269961997	1	-73.9832337185369	40.761128829398885	5
1	ChIJ6dn6HlZYwokRBoc8ubaUPnU	7	4	-73.98324344621193	40.76113269961997	1	-73.98324157637195	40.76113473147061	5
1	ChIJ6dn6HlZYwokRBoc8ubaUPnU	7	4	-73.98324344621193	40.76113269961997	1	-73.98324086480105	40.761133425540336	5
1	ChIJ6dn6HlZYwokRBoc8ubaUPnU	7	4	-73.98324344621193	40.76113269961997	1	-73.98324301855851	40.761131706970694	5
1	ChIJ6dn6HlZYwokRBoc8ubaUPnU	7	4	-73.98324344621193	40.76113269961997	1	-73.98324563859182	40.76111814160675	5
1	ChIJ6dn6HlZYwokRBoc8ubaUPnU	7	4	-73.98324344621193	40.76113269961997	2	-73.98332442562224	40.761362729972895	0
1	ChIJ6dn6HlZYwokRBoc8ubaUPnU	7	4	-73.98324344621193	40.76113269961997	2	-73.98305806866253	40.760988832040134	3
1	ChIJ6dn6HlZYwokRBoc8ubaUPnU	7	4	-73.98324344621193	40.76113269961997	2	-73.9832209833116	40.761063247608135	4
1	ChIJ6dn6HlZYwokRBoc8ubaUPnU	7	4	-73.98324344621193	40.76113269961997	2	-73.98316810937109	40.76093468245067	3
1	ChIJ6dn6HlZYwokRBoc8ubaUPnU	7	4	-73.98324344621193	40.76113269961997	2	-73.98287683161821	40.761140510816375	2
1	ChIJ6dn6HlZYwokRBoc8ubaUPnU	7	4	-73.98324344621193	40.76113269961997	2	-73.98310667084282	40.76109195979345	1
1	ChIJ6dn6HlZYwokRBoc8ubaUPnU	7	4	-73.98324344621193	40.76113269961997	2	-73.98277822828456	40.761417319336935	0
1	ChIJ6dn6HlZYwokRBoc8ubaUPnU	7	4	-73.98324344621193	40.76113269961997	2	-73.983393858813	40.76133037703378	0
1	ChIJ6dn6HlZYwokRBoc8ubaUPnU	7	4	-73.98324344621193	40.76113269961997	2	-73.98254507554724	40.761259996807645	0
1	ChIJ6dn6HlZYwokRBoc8ubaUPnU	7	4	-73.98324344621193	40.76113269961997	2	-73.98316128168543	40.761187575212126	3
1	ChIJ6dn6HlZYwokRBoc8ubaUPnU	7	4	-73.98324344621193	40.76113269961997	3	-73.98325448867311	40.76113685110022	5
1	ChIJ6dn6HlZYwokRBoc8ubaUPnU	7	4	-73.98324344621193	40.76113269961997	3	-73.98324232695389	40.76111119690189	5
1	ChIJ6dn6HlZYwokRBoc8ubaUPnU	7	4	-73.98324344621193	40.76113269961997	3	-73.9832479643729	40.761159130989256	5
1	ChIJ6dn6HlZYwokRBoc8ubaUPnU	7	4	-73.98324344621193	40.76113269961997	3	-73.98328149592929	40.761148091740665	5
1	ChIJ6dn6HlZYwokRBoc8ubaUPnU	7	4	-73.98324344621193	40.76113269961997	3	-73.98318131964827	40.76112879749082	2
1	ChIJ6dn6HlZYwokRBoc8ubaUPnU	7	4	-73.98324344621193	40.76113269961997	3	-73.98324668077657	40.76108370050758	5
1	ChIJ6dn6HlZYwokRBoc8ubaUPnU	7	4	-73.98324344621193	40.76113269961997	3	-73.98328740691389	40.76103161990007	7
1	ChIJ6dn6HlZYwokRBoc8ubaUPnU	7	4	-73.98324344621193	40.76113269961997	3	-73.98325880854024	40.761138077380345	5
1	ChIJ6dn6HlZYwokRBoc8ubaUPnU	7	4	-73.98324344621193	40.76113269961997	3	-73.9833349013968	40.76110347416672	14
1	ChIJ6dn6HlZYwokRBoc8ubaUPnU	7	4	-73.98324344621193	40.76113269961997	3	-73.98331633968779	40.76110098786406	14
1	ChIJ6dn6HlZYwokRBoc8ubaUPnU	7	5	-73.9829467	40.7611327	0	-73.9829467	40.7611327	1
1	ChIJ6dn6HlZYwokRBoc8ubaUPnU	7	5	-73.9829467	40.7611327	0	-73.9829467	40.7611327	1
1	ChIJ6dn6HlZYwokRBoc8ubaUPnU	7	5	-73.9829467	40.7611327	0	-73.9829467	40.7611327	1
1	ChIJ6dn6HlZYwokRBoc8ubaUPnU	7	5	-73.9829467	40.7611327	0	-73.9829467	40.7611327	1
1	ChIJ6dn6HlZYwokRBoc8ubaUPnU	7	5	-73.9829467	40.7611327	0	-73.9829467	40.7611327	1
1	ChIJ6dn6HlZYwokRBoc8ubaUPnU	7	5	-73.9829467	40.7611327	0	-73.9829467	40.7611327	1
1	ChIJ6dn6HlZYwokRBoc8ubaUPnU	7	5	-73.9829467	40.7611327	0	-73.9829467	40.7611327	1
1	ChIJ6dn6HlZYwokRBoc8ubaUPnU	7	5	-73.9829467	40.7611327	0	-73.9829467	40.7611327	1
1	ChIJ6dn6HlZYwokRBoc8ubaUPnU	7	5	-73.9829467	40.7611327	0	-73.9829467	40.7611327	1
1	ChIJ6dn6HlZYwokRBoc8ubaUPnU	7	5	-73.9829467	40.7611327	0	-73.9829467	40.7611327	1
1	ChIJ6dn6HlZYwokRBoc8ubaUPnU	7	5	-73.9829467	40.7611327	1	-73.98294675886343	40.761132181636874	1
1	ChIJ6dn6HlZYwokRBoc8ubaUPnU	7	5	-73.9829467	40.7611327	1	-73.9829416528007	40.761130189659454	1
1	ChIJ6dn6HlZYwokRBoc8ubaUPnU	7	5	-73.9829467	40.7611327	1	-73.98295003903179	40.761130335183054	1
1	ChIJ6dn6HlZYwokRBoc8ubaUPnU	7	5	-73.9829467	40.7611327	1	-73.98294592245205	40.76112289206156	1
1	ChIJ6dn6HlZYwokRBoc8ubaUPnU	7	5	-73.9829467	40.7611327	1	-73.9829465495075	40.761132609978446	1
1	ChIJ6dn6HlZYwokRBoc8ubaUPnU	7	5	-73.9829467	40.7611327	1	-73.98294740439056	40.76113105933177	1
1	ChIJ6dn6HlZYwokRBoc8ubaUPnU	7	5	-73.9829467	40.7611327	1	-73.98294507412501	40.76112520419879	1
1	ChIJ6dn6HlZYwokRBoc8ubaUPnU	7	5	-73.9829467	40.7611327	1	-73.98293949516393	40.761127004517725	1
1	ChIJ6dn6HlZYwokRBoc8ubaUPnU	7	5	-73.9829467	40.7611327	1	-73.98295277346084	40.76113250735429	1
1	ChIJ6dn6HlZYwokRBoc8ubaUPnU	7	5	-73.9829467	40.7611327	1	-73.98294441262718	40.761131283800516	1
1	ChIJ6dn6HlZYwokRBoc8ubaUPnU	7	5	-73.9829467	40.7611327	2	-73.98271796245942	40.761072957260154	14
1	ChIJ6dn6HlZYwokRBoc8ubaUPnU	7	5	-73.9829467	40.7611327	2	-73.98292572224874	40.76113388509892	2
1	ChIJ6dn6HlZYwokRBoc8ubaUPnU	7	5	-73.9829467	40.7611327	2	-73.98273658916128	40.76106569393295	13
1	ChIJ6dn6HlZYwokRBoc8ubaUPnU	7	5	-73.9829467	40.7611327	2	-73.98258868147775	40.76083509687879	0
1	ChIJ6dn6HlZYwokRBoc8ubaUPnU	7	5	-73.9829467	40.7611327	2	-73.98289325146736	40.7611681959325	3
1	ChIJ6dn6HlZYwokRBoc8ubaUPnU	7	5	-73.9829467	40.7611327	2	-73.98315259843028	40.76147354833386	0
1	ChIJ6dn6HlZYwokRBoc8ubaUPnU	7	5	-73.9829467	40.7611327	2	-73.98289907560682	40.76106199110513	4
1	ChIJ6dn6HlZYwokRBoc8ubaUPnU	7	5	-73.9829467	40.7611327	2	-73.98265915476377	40.76060514555798	0
1	ChIJ6dn6HlZYwokRBoc8ubaUPnU	7	5	-73.9829467	40.7611327	2	-73.98285605076667	40.76120744942291	3
1	ChIJ6dn6HlZYwokRBoc8ubaUPnU	7	5	-73.9829467	40.7611327	2	-73.98295473252001	40.76113484543334	1
1	ChIJ6dn6HlZYwokRBoc8ubaUPnU	7	5	-73.9829467	40.7611327	3	-73.98295954521633	40.76113052655194	1
1	ChIJ6dn6HlZYwokRBoc8ubaUPnU	7	5	-73.9829467	40.7611327	3	-73.9829956369717	40.76110687484384	1
1	ChIJ6dn6HlZYwokRBoc8ubaUPnU	7	5	-73.9829467	40.7611327	3	-73.98300773542897	40.76115827901486	1
1	ChIJ6dn6HlZYwokRBoc8ubaUPnU	7	5	-73.9829467	40.7611327	3	-73.98296738038206	40.761073313642214	1
1	ChIJ6dn6HlZYwokRBoc8ubaUPnU	7	5	-73.9829467	40.7611327	3	-73.98296582202919	40.76121896821015	2
1	ChIJ6dn6HlZYwokRBoc8ubaUPnU	7	5	-73.9829467	40.7611327	3	-73.9829039554308	40.76114547309272	2
1	ChIJ6dn6HlZYwokRBoc8ubaUPnU	7	5	-73.9829467	40.7611327	3	-73.98297758436479	40.76114871476026	1
1	ChIJ6dn6HlZYwokRBoc8ubaUPnU	7	5	-73.9829467	40.7611327	3	-73.9829512847148	40.761147204220926	1
1	ChIJ6dn6HlZYwokRBoc8ubaUPnU	7	5	-73.9829467	40.7611327	3	-73.98290907131782	40.761191019531424	2
1	ChIJ6dn6HlZYwokRBoc8ubaUPnU	7	5	-73.9829467	40.7611327	3	-73.98298320021625	40.76119478265652	2
1	ChIJ6dn6HlZYwokRBoc8ubaUPnU	7	6	-73.98264995378807	40.76113269961997	0	-73.98264995378807	40.76113269961997	19
1	ChIJ6dn6HlZYwokRBoc8ubaUPnU	7	6	-73.98264995378807	40.76113269961997	0	-73.98264995378807	40.76113269961997	19
1	ChIJ6dn6HlZYwokRBoc8ubaUPnU	7	6	-73.98264995378807	40.76113269961997	0	-73.98264995378807	40.76113269961997	19
1	ChIJ6dn6HlZYwokRBoc8ubaUPnU	7	6	-73.98264995378807	40.76113269961997	0	-73.98264995378807	40.76113269961997	19
1	ChIJ6dn6HlZYwokRBoc8ubaUPnU	7	6	-73.98264995378807	40.76113269961997	0	-73.98264995378807	40.76113269961997	19
1	ChIJ6dn6HlZYwokRBoc8ubaUPnU	7	6	-73.98264995378807	40.76113269961997	0	-73.98264995378807	40.76113269961997	19
1	ChIJ6dn6HlZYwokRBoc8ubaUPnU	7	6	-73.98264995378807	40.76113269961997	0	-73.98264995378807	40.76113269961997	19
1	ChIJ6dn6HlZYwokRBoc8ubaUPnU	7	6	-73.98264995378807	40.76113269961997	0	-73.98264995378807	40.76113269961997	19
1	ChIJ6dn6HlZYwokRBoc8ubaUPnU	7	6	-73.98264995378807	40.76113269961997	0	-73.98264995378807	40.76113269961997	19
1	ChIJ6dn6HlZYwokRBoc8ubaUPnU	7	6	-73.98264995378807	40.76113269961997	0	-73.98264995378807	40.76113269961997	19
1	ChIJ6dn6HlZYwokRBoc8ubaUPnU	7	6	-73.98264995378807	40.76113269961997	1	-73.98264998320687	40.76113267098867	19
1	ChIJ6dn6HlZYwokRBoc8ubaUPnU	7	6	-73.98264995378807	40.76113269961997	1	-73.98264612309929	40.76113411154032	19
1	ChIJ6dn6HlZYwokRBoc8ubaUPnU	7	6	-73.98264995378807	40.76113269961997	1	-73.98266066557846	40.761110141058396	17
1	ChIJ6dn6HlZYwokRBoc8ubaUPnU	7	6	-73.98264995378807	40.76113269961997	1	-73.98265180011144	40.761133395375595	19
1	ChIJ6dn6HlZYwokRBoc8ubaUPnU	7	6	-73.98264995378807	40.76113269961997	1	-73.98264787102426	40.76115454305712	19
1	ChIJ6dn6HlZYwokRBoc8ubaUPnU	7	6	-73.98264995378807	40.76113269961997	1	-73.98262720279263	40.761145572160245	0
1	ChIJ6dn6HlZYwokRBoc8ubaUPnU	7	6	-73.98264995378807	40.76113269961997	1	-73.98264622033437	40.76113644520037	19
1	ChIJ6dn6HlZYwokRBoc8ubaUPnU	7	6	-73.98264995378807	40.76113269961997	1	-73.982648913734	40.761126074348454	19
1	ChIJ6dn6HlZYwokRBoc8ubaUPnU	7	6	-73.98264995378807	40.76113269961997	1	-73.98265617645967	40.761136306211405	17
1	ChIJ6dn6HlZYwokRBoc8ubaUPnU	7	6	-73.98264995378807	40.76113269961997	1	-73.98264848741087	40.76113229567115	19
1	ChIJ6dn6HlZYwokRBoc8ubaUPnU	7	6	-73.98264995378807	40.76113269961997	2	-73.98201716533774	40.76124903413941	0
1	ChIJ6dn6HlZYwokRBoc8ubaUPnU	7	6	-73.98264995378807	40.76113269961997	2	-73.98262737331514	40.76111247460988	0
1	ChIJ6dn6HlZYwokRBoc8ubaUPnU	7	6	-73.98264995378807	40.76113269961997	2	-73.98299078371399	40.76122911844602	2
1	ChIJ6dn6HlZYwokRBoc8ubaUPnU	7	6	-73.98264995378807	40.76113269961997	2	-73.98270427311702	40.760721140164186	0
1	ChIJ6dn6HlZYwokRBoc8ubaUPnU	7	6	-73.98264995378807	40.76113269961997	2	-73.9823611279523	40.76109419931571	0
1	ChIJ6dn6HlZYwokRBoc8ubaUPnU	7	6	-73.98264995378807	40.76113269961997	2	-73.98184644225546	40.7615520385767	0
1	ChIJ6dn6HlZYwokRBoc8ubaUPnU	7	6	-73.98264995378807	40.76113269961997	2	-73.98230819486253	40.76119168012135	0
1	ChIJ6dn6HlZYwokRBoc8ubaUPnU	7	6	-73.98264995378807	40.76113269961997	2	-73.98272453509843	40.76084928121947	0
1	ChIJ6dn6HlZYwokRBoc8ubaUPnU	7	6	-73.98264995378807	40.76113269961997	2	-73.98262545092216	40.76118184883695	20
1	ChIJ6dn6HlZYwokRBoc8ubaUPnU	7	6	-73.98264995378807	40.76113269961997	2	-73.98303163951567	40.76089135958733	5
1	ChIJ6dn6HlZYwokRBoc8ubaUPnU	7	6	-73.98264995378807	40.76113269961997	3	-73.98261145892118	40.7610971266163	0
1	ChIJ6dn6HlZYwokRBoc8ubaUPnU	7	6	-73.98264995378807	40.76113269961997	3	-73.98270915359328	40.76112784766744	15
1	ChIJ6dn6HlZYwokRBoc8ubaUPnU	7	6	-73.98264995378807	40.76113269961997	3	-73.98270983881646	40.76122363755049	8
1	ChIJ6dn6HlZYwokRBoc8ubaUPnU	7	6	-73.98264995378807	40.76113269961997	3	-73.98267383740058	40.76113626628951	15
1	ChIJ6dn6HlZYwokRBoc8ubaUPnU	7	6	-73.98264995378807	40.76113269961997	3	-73.9825799265399	40.76125402950007	0
1	ChIJ6dn6HlZYwokRBoc8ubaUPnU	7	6	-73.98264995378807	40.76113269961997	3	-73.98256221375395	40.761108858812925	0
1	ChIJ6dn6HlZYwokRBoc8ubaUPnU	7	6	-73.98264995378807	40.76113269961997	3	-73.98279517546253	40.76117013278373	5
1	ChIJ6dn6HlZYwokRBoc8ubaUPnU	7	6	-73.98264995378807	40.76113269961997	3	-73.98263965088093	40.761041147786315	0
1	ChIJ6dn6HlZYwokRBoc8ubaUPnU	7	6	-73.98264995378807	40.76113269961997	3	-73.98263588460682	40.76111828208268	20
1	ChIJ6dn6HlZYwokRBoc8ubaUPnU	7	6	-73.98264995378807	40.76113269961997	3	-73.98261312722771	40.76107007736158	0
1	ChIJ6dn6HlZYwokRBoc8ubaUPnU	7	7	-73.98324344520847	40.76090793272193	0	-73.98324344520847	40.76090793272193	8
1	ChIJ6dn6HlZYwokRBoc8ubaUPnU	7	7	-73.98324344520847	40.76090793272193	0	-73.98324344520847	40.76090793272193	8
1	ChIJ6dn6HlZYwokRBoc8ubaUPnU	7	7	-73.98324344520847	40.76090793272193	0	-73.98324344520847	40.76090793272193	8
1	ChIJ6dn6HlZYwokRBoc8ubaUPnU	7	7	-73.98324344520847	40.76090793272193	0	-73.98324344520847	40.76090793272193	8
1	ChIJ6dn6HlZYwokRBoc8ubaUPnU	7	7	-73.98324344520847	40.76090793272193	0	-73.98324344520847	40.76090793272193	8
1	ChIJ6dn6HlZYwokRBoc8ubaUPnU	7	7	-73.98324344520847	40.76090793272193	0	-73.98324344520847	40.76090793272193	8
1	ChIJ6dn6HlZYwokRBoc8ubaUPnU	7	7	-73.98324344520847	40.76090793272193	0	-73.98324344520847	40.76090793272193	8
1	ChIJ6dn6HlZYwokRBoc8ubaUPnU	7	7	-73.98324344520847	40.76090793272193	0	-73.98324344520847	40.76090793272193	8
1	ChIJ6dn6HlZYwokRBoc8ubaUPnU	7	7	-73.98324344520847	40.76090793272193	0	-73.98324344520847	40.76090793272193	8
1	ChIJ6dn6HlZYwokRBoc8ubaUPnU	7	7	-73.98324344520847	40.76090793272193	0	-73.98324344520847	40.76090793272193	8
1	ChIJ6dn6HlZYwokRBoc8ubaUPnU	7	7	-73.98324344520847	40.76090793272193	1	-73.98324371812348	40.76090820853117	8
1	ChIJ6dn6HlZYwokRBoc8ubaUPnU	7	7	-73.98324344520847	40.76090793272193	1	-73.98322948076344	40.760924790751105	5
1	ChIJ6dn6HlZYwokRBoc8ubaUPnU	7	7	-73.98324344520847	40.76090793272193	1	-73.98325190505943	40.76091120884455	7
1	ChIJ6dn6HlZYwokRBoc8ubaUPnU	7	7	-73.98324344520847	40.76090793272193	1	-73.98324359925246	40.76090896989759	8
1	ChIJ6dn6HlZYwokRBoc8ubaUPnU	7	7	-73.98324344520847	40.76090793272193	1	-73.98322503547078	40.76091636570367	5
1	ChIJ6dn6HlZYwokRBoc8ubaUPnU	7	7	-73.98324344520847	40.76090793272193	1	-73.9832356426906	40.76090879872185	8
1	ChIJ6dn6HlZYwokRBoc8ubaUPnU	7	7	-73.98324344520847	40.76090793272193	1	-73.98323718082636	40.760902115044445	8
1	ChIJ6dn6HlZYwokRBoc8ubaUPnU	7	7	-73.98324344520847	40.76090793272193	1	-73.98324367130638	40.760912974681666	6
1	ChIJ6dn6HlZYwokRBoc8ubaUPnU	7	7	-73.98324344520847	40.76090793272193	1	-73.98324931877987	40.76090818827029	8
1	ChIJ6dn6HlZYwokRBoc8ubaUPnU	7	7	-73.98324344520847	40.76090793272193	1	-73.98324128198047	40.76090701133876	8
1	ChIJ6dn6HlZYwokRBoc8ubaUPnU	7	7	-73.98324344520847	40.76090793272193	2	-73.9835831248692	40.76073448701468	0
1	ChIJ6dn6HlZYwokRBoc8ubaUPnU	7	7	-73.98324344520847	40.76090793272193	2	-73.98325530097766	40.76089274521741	8
1	ChIJ6dn6HlZYwokRBoc8ubaUPnU	7	7	-73.98324344520847	40.76090793272193	2	-73.98405687603152	40.7606906370526	0
1	ChIJ6dn6HlZYwokRBoc8ubaUPnU	7	7	-73.98324344520847	40.76090793272193	2	-73.98324116646015	40.76096378729549	5
1	ChIJ6dn6HlZYwokRBoc8ubaUPnU	7	7	-73.98324344520847	40.76090793272193	2	-73.98329262975113	40.761225060745645	6
1	ChIJ6dn6HlZYwokRBoc8ubaUPnU	7	7	-73.98324344520847	40.76090793272193	2	-73.98396456871511	40.76091775356919	0
1	ChIJ6dn6HlZYwokRBoc8ubaUPnU	7	7	-73.98324344520847	40.76090793272193	2	-73.9830775334855	40.76150159954089	0
1	ChIJ6dn6HlZYwokRBoc8ubaUPnU	7	7	-73.98324344520847	40.76090793272193	2	-73.98297139584469	40.76099271474168	5
1	ChIJ6dn6HlZYwokRBoc8ubaUPnU	7	7	-73.98324344520847	40.76090793272193	2	-73.98323809220436	40.760781508851466	0
1	ChIJ6dn6HlZYwokRBoc8ubaUPnU	7	7	-73.98324344520847	40.76090793272193	2	-73.98318129503028	40.760616292443956	0
1	ChIJ6dn6HlZYwokRBoc8ubaUPnU	7	7	-73.98324344520847	40.76090793272193	3	-73.98325026547457	40.76090513394127	8
1	ChIJ6dn6HlZYwokRBoc8ubaUPnU	7	7	-73.98324344520847	40.76090793272193	3	-73.98323192169521	40.76084854866026	15
1	ChIJ6dn6HlZYwokRBoc8ubaUPnU	7	7	-73.98324344520847	40.76090793272193	3	-73.98325456802532	40.76093308308309	6
1	ChIJ6dn6HlZYwokRBoc8ubaUPnU	7	7	-73.98324344520847	40.76090793272193	3	-73.98328599000241	40.7609177048126	7
1	ChIJ6dn6HlZYwokRBoc8ubaUPnU	7	7	-73.98324344520847	40.76090793272193	3	-73.98317087402035	40.76089437281267	7
1	ChIJ6dn6HlZYwokRBoc8ubaUPnU	7	7	-73.98324344520847	40.76090793272193	3	-73.98322446699908	40.76094178033308	5
1	ChIJ6dn6HlZYwokRBoc8ubaUPnU	7	7	-73.98324344520847	40.76090793272193	3	-73.98308444065067	40.760915106820214	5
1	ChIJ6dn6HlZYwokRBoc8ubaUPnU	7	7	-73.98324344520847	40.76090793272193	3	-73.98312318126035	40.76090340841992	6
1	ChIJ6dn6HlZYwokRBoc8ubaUPnU	7	7	-73.98324344520847	40.76090793272193	3	-73.98334900854469	40.76092117868867	0
1	ChIJ6dn6HlZYwokRBoc8ubaUPnU	7	7	-73.98324344520847	40.76090793272193	3	-73.98329640155475	40.760855206455844	17
1	ChIJ6dn6HlZYwokRBoc8ubaUPnU	7	8	-73.9829467	40.76090793310196	0	-73.9829467	40.76090793310196	7
1	ChIJ6dn6HlZYwokRBoc8ubaUPnU	7	8	-73.9829467	40.76090793310196	0	-73.9829467	40.76090793310196	7
1	ChIJ6dn6HlZYwokRBoc8ubaUPnU	7	8	-73.9829467	40.76090793310196	0	-73.9829467	40.76090793310196	7
1	ChIJ6dn6HlZYwokRBoc8ubaUPnU	7	8	-73.9829467	40.76090793310196	0	-73.9829467	40.76090793310196	7
1	ChIJ6dn6HlZYwokRBoc8ubaUPnU	7	8	-73.9829467	40.76090793310196	0	-73.9829467	40.76090793310196	7
1	ChIJ6dn6HlZYwokRBoc8ubaUPnU	7	8	-73.9829467	40.76090793310196	0	-73.9829467	40.76090793310196	7
1	ChIJ6dn6HlZYwokRBoc8ubaUPnU	7	8	-73.9829467	40.76090793310196	0	-73.9829467	40.76090793310196	7
1	ChIJ6dn6HlZYwokRBoc8ubaUPnU	7	8	-73.9829467	40.76090793310196	0	-73.9829467	40.76090793310196	7
1	ChIJ6dn6HlZYwokRBoc8ubaUPnU	7	8	-73.9829467	40.76090793310196	0	-73.9829467	40.76090793310196	7
1	ChIJ6dn6HlZYwokRBoc8ubaUPnU	7	8	-73.9829467	40.76090793310196	0	-73.9829467	40.76090793310196	7
1	ChIJ6dn6HlZYwokRBoc8ubaUPnU	7	8	-73.9829467	40.76090793310196	1	-73.98294963318043	40.76090851970852	7
1	ChIJ6dn6HlZYwokRBoc8ubaUPnU	7	8	-73.9829467	40.76090793310196	1	-73.9829812828023	40.76092883759823	6
1	ChIJ6dn6HlZYwokRBoc8ubaUPnU	7	8	-73.9829467	40.76090793310196	1	-73.98295651439848	40.760904492809296	7
1	ChIJ6dn6HlZYwokRBoc8ubaUPnU	7	8	-73.9829467	40.76090793310196	1	-73.98295778033359	40.760902532792564	7
1	ChIJ6dn6HlZYwokRBoc8ubaUPnU	7	8	-73.9829467	40.76090793310196	1	-73.9829435161092	40.76091077955832	7
1	ChIJ6dn6HlZYwokRBoc8ubaUPnU	7	8	-73.9829467	40.76090793310196	1	-73.98296585520637	40.76090114680707	7
1	ChIJ6dn6HlZYwokRBoc8ubaUPnU	7	8	-73.9829467	40.76090793310196	1	-73.98293591053955	40.760902282232436	7
1	ChIJ6dn6HlZYwokRBoc8ubaUPnU	7	8	-73.9829467	40.76090793310196	1	-73.98293770230815	40.760899964956785	7
1	ChIJ6dn6HlZYwokRBoc8ubaUPnU	7	8	-73.9829467	40.76090793310196	1	-73.98295404800395	40.76089142644988	7
1	ChIJ6dn6HlZYwokRBoc8ubaUPnU	7	8	-73.9829467	40.76090793310196	1	-73.98295097250778	40.76088918738322	7
1	ChIJ6dn6HlZYwokRBoc8ubaUPnU	7	8	-73.9829467	40.76090793310196	2	-73.98332091929463	40.76106191467965	15
1	ChIJ6dn6HlZYwokRBoc8ubaUPnU	7	8	-73.9829467	40.76090793310196	2	-73.98291043858781	40.760881524165036	7
1	ChIJ6dn6HlZYwokRBoc8ubaUPnU	7	8	-73.9829467	40.76090793310196	2	-73.98304866669584	40.760795418972435	18
1	ChIJ6dn6HlZYwokRBoc8ubaUPnU	7	8	-73.9829467	40.76090793310196	2	-73.98279732994818	40.76094809366978	14
1	ChIJ6dn6HlZYwokRBoc8ubaUPnU	7	8	-73.9829467	40.76090793310196	2	-73.98316954977324	40.7610245103824	3
1	ChIJ6dn6HlZYwokRBoc8ubaUPnU	7	8	-73.9829467	40.76090793310196	2	-73.98294862772202	40.760978627817885	5
1	ChIJ6dn6HlZYwokRBoc8ubaUPnU	7	8	-73.9829467	40.76090793310196	2	-73.98253612969312	40.76082032169497	0
1	ChIJ6dn6HlZYwokRBoc8ubaUPnU	7	8	-73.9829467	40.76090793310196	2	-73.9830053831804	40.76087225284063	9
1	ChIJ6dn6HlZYwokRBoc8ubaUPnU	7	8	-73.9829467	40.76090793310196	2	-73.98380461339273	40.760857362371624	0
1	ChIJ6dn6HlZYwokRBoc8ubaUPnU	7	8	-73.9829467	40.76090793310196	2	-73.98296550389868	40.76087978722286	9
1	ChIJ6dn6HlZYwokRBoc8ubaUPnU	7	8	-73.9829467	40.76090793310196	3	-73.98292474123768	40.760957170059065	6
1	ChIJ6dn6HlZYwokRBoc8ubaUPnU	7	8	-73.9829467	40.76090793310196	3	-73.98295082078202	40.76093564152014	7
1	ChIJ6dn6HlZYwokRBoc8ubaUPnU	7	8	-73.9829467	40.76090793310196	3	-73.98291273966541	40.76090404306592	7
1	ChIJ6dn6HlZYwokRBoc8ubaUPnU	7	8	-73.9829467	40.76090793310196	3	-73.98296457653588	40.76090477140816	7
1	ChIJ6dn6HlZYwokRBoc8ubaUPnU	7	8	-73.9829467	40.76090793310196	3	-73.98285654255648	40.76087107687913	16
1	ChIJ6dn6HlZYwokRBoc8ubaUPnU	7	8	-73.9829467	40.76090793310196	3	-73.98286396999669	40.76096793082377	6
1	ChIJ6dn6HlZYwokRBoc8ubaUPnU	7	8	-73.9829467	40.76090793310196	3	-73.98294779948787	40.76090566637756	7
1	ChIJ6dn6HlZYwokRBoc8ubaUPnU	7	8	-73.9829467	40.76090793310196	3	-73.98292418405431	40.76090349919137	7
1	ChIJ6dn6HlZYwokRBoc8ubaUPnU	7	8	-73.9829467	40.76090793310196	3	-73.98280497369707	40.761058764717454	6
1	ChIJ6dn6HlZYwokRBoc8ubaUPnU	7	8	-73.9829467	40.76090793310196	3	-73.98295362362637	40.76091181861094	7
1	ChIJ6dn6HlZYwokRBoc8ubaUPnU	7	9	-73.98264995479153	40.76090793272193	0	-73.98264995479153	40.76090793272193	0
1	ChIJ6dn6HlZYwokRBoc8ubaUPnU	7	9	-73.98264995479153	40.76090793272193	0	-73.98264995479153	40.76090793272193	0
1	ChIJ6dn6HlZYwokRBoc8ubaUPnU	7	9	-73.98264995479153	40.76090793272193	0	-73.98264995479153	40.76090793272193	0
1	ChIJ6dn6HlZYwokRBoc8ubaUPnU	7	9	-73.98264995479153	40.76090793272193	0	-73.98264995479153	40.76090793272193	0
1	ChIJ6dn6HlZYwokRBoc8ubaUPnU	7	9	-73.98264995479153	40.76090793272193	0	-73.98264995479153	40.76090793272193	0
1	ChIJ6dn6HlZYwokRBoc8ubaUPnU	7	9	-73.98264995479153	40.76090793272193	0	-73.98264995479153	40.76090793272193	0
1	ChIJ6dn6HlZYwokRBoc8ubaUPnU	7	9	-73.98264995479153	40.76090793272193	0	-73.98264995479153	40.76090793272193	0
1	ChIJ6dn6HlZYwokRBoc8ubaUPnU	7	9	-73.98264995479153	40.76090793272193	0	-73.98264995479153	40.76090793272193	0
1	ChIJ6dn6HlZYwokRBoc8ubaUPnU	7	9	-73.98264995479153	40.76090793272193	0	-73.98264995479153	40.76090793272193	0
1	ChIJ6dn6HlZYwokRBoc8ubaUPnU	7	9	-73.98264995479153	40.76090793272193	0	-73.98264995479153	40.76090793272193	0
1	ChIJ6dn6HlZYwokRBoc8ubaUPnU	7	9	-73.98264995479153	40.76090793272193	1	-73.98264537854297	40.76091266576064	0
1	ChIJ6dn6HlZYwokRBoc8ubaUPnU	7	9	-73.98264995479153	40.76090793272193	1	-73.98264650017155	40.76090538644616	0
1	ChIJ6dn6HlZYwokRBoc8ubaUPnU	7	9	-73.98264995479153	40.76090793272193	1	-73.98264929774611	40.76090723268156	0
1	ChIJ6dn6HlZYwokRBoc8ubaUPnU	7	9	-73.98264995479153	40.76090793272193	1	-73.98261061823196	40.76090967988273	0
1	ChIJ6dn6HlZYwokRBoc8ubaUPnU	7	9	-73.98264995479153	40.76090793272193	1	-73.9826567232635	40.76090219722739	0
1	ChIJ6dn6HlZYwokRBoc8ubaUPnU	7	9	-73.98264995479153	40.76090793272193	1	-73.98265187284925	40.760901131083024	0
1	ChIJ6dn6HlZYwokRBoc8ubaUPnU	7	9	-73.98264995479153	40.76090793272193	1	-73.98264615865962	40.76090911896002	0
1	ChIJ6dn6HlZYwokRBoc8ubaUPnU	7	9	-73.98264995479153	40.76090793272193	1	-73.98265125125499	40.76090372018106	0
1	ChIJ6dn6HlZYwokRBoc8ubaUPnU	7	9	-73.98264995479153	40.76090793272193	1	-73.9826473434503	40.76091185357814	0
1	ChIJ6dn6HlZYwokRBoc8ubaUPnU	7	9	-73.98264995479153	40.76090793272193	1	-73.98265228546914	40.76091491705136	0
1	ChIJ6dn6HlZYwokRBoc8ubaUPnU	7	9	-73.98264995479153	40.76090793272193	2	-73.98260078158317	40.76091668079999	0
1	ChIJ6dn6HlZYwokRBoc8ubaUPnU	7	9	-73.98264995479153	40.76090793272193	2	-73.98250282028293	40.76081381616177	0
1	ChIJ6dn6HlZYwokRBoc8ubaUPnU	7	9	-73.98264995479153	40.76090793272193	2	-73.98285529349275	40.76099514772729	6
1	ChIJ6dn6HlZYwokRBoc8ubaUPnU	7	9	-73.98264995479153	40.76090793272193	2	-73.98221127251944	40.76069614433247	0
1	ChIJ6dn6HlZYwokRBoc8ubaUPnU	7	9	-73.98264995479153	40.76090793272193	2	-73.98261434815315	40.76123857819339	0
1	ChIJ6dn6HlZYwokRBoc8ubaUPnU	7	9	-73.98264995479153	40.76090793272193	2	-73.98213328851448	40.76098971494728	0
1	ChIJ6dn6HlZYwokRBoc8ubaUPnU	7	9	-73.98264995479153	40.76090793272193	2	-73.98220925034848	40.7606280966251	0
1	ChIJ6dn6HlZYwokRBoc8ubaUPnU	7	9	-73.98264995479153	40.76090793272193	2	-73.98205180678917	40.76132461268806	0
1	ChIJ6dn6HlZYwokRBoc8ubaUPnU	7	9	-73.98264995479153	40.76090793272193	2	-73.98202314599477	40.76049736343605	0
1	ChIJ6dn6HlZYwokRBoc8ubaUPnU	7	9	-73.98264995479153	40.76090793272193	2	-73.98246424731902	40.76126613928729	0
1	ChIJ6dn6HlZYwokRBoc8ubaUPnU	7	9	-73.98264995479153	40.76090793272193	3	-73.9826422428713	40.76090889019083	0
1	ChIJ6dn6HlZYwokRBoc8ubaUPnU	7	9	-73.98264995479153	40.76090793272193	3	-73.98262308087796	40.761033329257025	0
1	ChIJ6dn6HlZYwokRBoc8ubaUPnU	7	9	-73.98264995479153	40.76090793272193	3	-73.98251001805815	40.760978312938384	0
1	ChIJ6dn6HlZYwokRBoc8ubaUPnU	7	9	-73.98264995479153	40.76090793272193	3	-73.98273300089778	40.76089413569484	0
1	ChIJ6dn6HlZYwokRBoc8ubaUPnU	7	9	-73.98264995479153	40.76090793272193	3	-73.98269511387532	40.760853441669596	0
1	ChIJ6dn6HlZYwokRBoc8ubaUPnU	7	9	-73.98264995479153	40.76090793272193	3	-73.9826979097688	40.76095677537564	0
1	ChIJ6dn6HlZYwokRBoc8ubaUPnU	7	9	-73.98264995479153	40.76090793272193	3	-73.9825125536583	40.76088182510495	0
1	ChIJ6dn6HlZYwokRBoc8ubaUPnU	7	9	-73.98264995479153	40.76090793272193	3	-73.982664450321	40.760905376351594	0
1	ChIJ6dn6HlZYwokRBoc8ubaUPnU	7	9	-73.98264995479153	40.76090793272193	3	-73.98268927205788	40.76086789545079	0
1	ChIJ6dn6HlZYwokRBoc8ubaUPnU	7	9	-73.98264995479153	40.76090793272193	3	-73.98265896683854	40.760915334374666	0
1	ChIJf4l7rVeipBIRd88Z241wfs4	10	1	2.1759714492942313	41.37957676650963	0	2.1759714492942313	41.37957676650963	0
1	ChIJf4l7rVeipBIRd88Z241wfs4	10	1	2.1759714492942313	41.37957676650963	0	2.1759714492942313	41.37957676650963	0
1	ChIJf4l7rVeipBIRd88Z241wfs4	10	1	2.1759714492942313	41.37957676650963	0	2.1759714492942313	41.37957676650963	0
1	ChIJf4l7rVeipBIRd88Z241wfs4	10	1	2.1759714492942313	41.37957676650963	0	2.1759714492942313	41.37957676650963	0
1	ChIJf4l7rVeipBIRd88Z241wfs4	10	1	2.1759714492942313	41.37957676650963	0	2.1759714492942313	41.37957676650963	0
1	ChIJf4l7rVeipBIRd88Z241wfs4	10	1	2.1759714492942313	41.37957676650963	0	2.1759714492942313	41.37957676650963	0
1	ChIJf4l7rVeipBIRd88Z241wfs4	10	1	2.1759714492942313	41.37957676650963	0	2.1759714492942313	41.37957676650963	0
1	ChIJf4l7rVeipBIRd88Z241wfs4	10	1	2.1759714492942313	41.37957676650963	0	2.1759714492942313	41.37957676650963	0
1	ChIJf4l7rVeipBIRd88Z241wfs4	10	1	2.1759714492942313	41.37957676650963	0	2.1759714492942313	41.37957676650963	0
1	ChIJf4l7rVeipBIRd88Z241wfs4	10	1	2.1759714492942313	41.37957676650963	0	2.1759714492942313	41.37957676650963	0
1	ChIJf4l7rVeipBIRd88Z241wfs4	10	1	2.1759714492942313	41.37957676650963	1	2.1759493286098355	41.379572439220674	0
1	ChIJf4l7rVeipBIRd88Z241wfs4	10	1	2.1759714492942313	41.37957676650963	1	2.1759832253513394	41.37956576219784	0
1	ChIJf4l7rVeipBIRd88Z241wfs4	10	1	2.1759714492942313	41.37957676650963	1	2.175969047309769	41.37958232635144	0
1	ChIJf4l7rVeipBIRd88Z241wfs4	10	1	2.1759714492942313	41.37957676650963	1	2.175971905613305	41.379576390405425	0
1	ChIJf4l7rVeipBIRd88Z241wfs4	10	1	2.1759714492942313	41.37957676650963	1	2.175979048553969	41.37956618538243	0
1	ChIJf4l7rVeipBIRd88Z241wfs4	10	1	2.1759714492942313	41.37957676650963	1	2.175973316908252	41.37959179779568	0
1	ChIJf4l7rVeipBIRd88Z241wfs4	10	1	2.1759714492942313	41.37957676650963	1	2.1759706494911684	41.37957895130455	0
1	ChIJf4l7rVeipBIRd88Z241wfs4	10	1	2.1759714492942313	41.37957676650963	1	2.175969611324448	41.37958175432847	0
1	ChIJf4l7rVeipBIRd88Z241wfs4	10	1	2.1759714492942313	41.37957676650963	1	2.1759746641355955	41.37958746348274	0
1	ChIJf4l7rVeipBIRd88Z241wfs4	10	1	2.1759714492942313	41.37957676650963	1	2.175995445073196	41.37958240367966	0
1	ChIJf4l7rVeipBIRd88Z241wfs4	10	1	2.1759714492942313	41.37957676650963	2	2.175998708293777	41.37946776732864	18
1	ChIJf4l7rVeipBIRd88Z241wfs4	10	1	2.1759714492942313	41.37957676650963	2	2.174987337898176	41.379809216052614	0
1	ChIJf4l7rVeipBIRd88Z241wfs4	10	1	2.1759714492942313	41.37957676650963	2	2.1763847214290766	41.37963378971513	0
1	ChIJf4l7rVeipBIRd88Z241wfs4	10	1	2.1759714492942313	41.37957676650963	2	2.1760574992019017	41.3798120894121	0
1	ChIJf4l7rVeipBIRd88Z241wfs4	10	1	2.1759714492942313	41.37957676650963	2	2.175646650367018	41.37950964696758	0
1	ChIJf4l7rVeipBIRd88Z241wfs4	10	1	2.1759714492942313	41.37957676650963	2	2.1761703156010235	41.3793838424285	4
1	ChIJf4l7rVeipBIRd88Z241wfs4	10	1	2.1759714492942313	41.37957676650963	2	2.1766348569454546	41.38002262253976	0
1	ChIJf4l7rVeipBIRd88Z241wfs4	10	1	2.1759714492942313	41.37957676650963	2	2.176162933152177	41.379411204352834	7
1	ChIJf4l7rVeipBIRd88Z241wfs4	10	1	2.1759714492942313	41.37957676650963	2	2.175897887520641	41.37960240016294	0
1	ChIJf4l7rVeipBIRd88Z241wfs4	10	1	2.1759714492942313	41.37957676650963	2	2.175688702322903	41.379045739498345	0
1	ChIJf4l7rVeipBIRd88Z241wfs4	10	1	2.1759714492942313	41.37957676650963	3	2.1759717285678435	41.37957944412054	0
1	ChIJf4l7rVeipBIRd88Z241wfs4	10	1	2.1759714492942313	41.37957676650963	3	2.175972238102364	41.37959541543234	0
1	ChIJf4l7rVeipBIRd88Z241wfs4	10	1	2.1759714492942313	41.37957676650963	3	2.1760380568331956	41.37952470696358	0
1	ChIJf4l7rVeipBIRd88Z241wfs4	10	1	2.1759714492942313	41.37957676650963	3	2.1759938654982216	41.37957153723637	0
1	ChIJf4l7rVeipBIRd88Z241wfs4	10	1	2.1759714492942313	41.37957676650963	3	2.1760295466609785	41.379611831647345	0
1	ChIJf4l7rVeipBIRd88Z241wfs4	10	1	2.1759714492942313	41.37957676650963	3	2.1760722335492586	41.37956594333391	0
1	ChIJf4l7rVeipBIRd88Z241wfs4	10	1	2.1759714492942313	41.37957676650963	3	2.1758656647796233	41.37955380621599	0
1	ChIJf4l7rVeipBIRd88Z241wfs4	10	1	2.1759714492942313	41.37957676650963	3	2.176026969735578	41.379640308321775	0
1	ChIJf4l7rVeipBIRd88Z241wfs4	10	1	2.1759714492942313	41.37957676650963	3	2.1760008026334274	41.37949313391242	0
1	ChIJf4l7rVeipBIRd88Z241wfs4	10	1	2.1759714492942313	41.37957676650963	3	2.1759827730896077	41.37960340847601	0
1	ChIJf4l7rVeipBIRd88Z241wfs4	10	2	2.176271	41.37957676689803	0	2.176271	41.37957676689803	0
1	ChIJf4l7rVeipBIRd88Z241wfs4	10	2	2.176271	41.37957676689803	0	2.176271	41.37957676689803	0
1	ChIJf4l7rVeipBIRd88Z241wfs4	10	2	2.176271	41.37957676689803	0	2.176271	41.37957676689803	0
1	ChIJf4l7rVeipBIRd88Z241wfs4	10	2	2.176271	41.37957676689803	0	2.176271	41.37957676689803	0
1	ChIJf4l7rVeipBIRd88Z241wfs4	10	2	2.176271	41.37957676689803	0	2.176271	41.37957676689803	0
1	ChIJf4l7rVeipBIRd88Z241wfs4	10	2	2.176271	41.37957676689803	0	2.176271	41.37957676689803	0
1	ChIJf4l7rVeipBIRd88Z241wfs4	10	2	2.176271	41.37957676689803	0	2.176271	41.37957676689803	0
1	ChIJf4l7rVeipBIRd88Z241wfs4	10	2	2.176271	41.37957676689803	0	2.176271	41.37957676689803	0
1	ChIJf4l7rVeipBIRd88Z241wfs4	10	2	2.176271	41.37957676689803	0	2.176271	41.37957676689803	0
1	ChIJf4l7rVeipBIRd88Z241wfs4	10	2	2.176271	41.37957676689803	0	2.176271	41.37957676689803	0
1	ChIJf4l7rVeipBIRd88Z241wfs4	10	2	2.176271	41.37957676689803	1	2.1762680469279108	41.37957162684907	0
1	ChIJf4l7rVeipBIRd88Z241wfs4	10	2	2.176271	41.37957676689803	1	2.1762435521206434	41.37956935371391	0
1	ChIJf4l7rVeipBIRd88Z241wfs4	10	2	2.176271	41.37957676689803	1	2.1762654730983653	41.3795680761738	0
1	ChIJf4l7rVeipBIRd88Z241wfs4	10	2	2.176271	41.37957676689803	1	2.1762785966782223	41.37958631330476	0
1	ChIJf4l7rVeipBIRd88Z241wfs4	10	2	2.176271	41.37957676689803	1	2.1762609357807907	41.379573250003155	0
1	ChIJf4l7rVeipBIRd88Z241wfs4	10	2	2.176271	41.37957676689803	1	2.1762735111264115	41.379568872404626	0
1	ChIJf4l7rVeipBIRd88Z241wfs4	10	2	2.176271	41.37957676689803	1	2.176269309107492	41.37957600287318	0
1	ChIJf4l7rVeipBIRd88Z241wfs4	10	2	2.176271	41.37957676689803	1	2.1762774437790187	41.37958595892467	0
1	ChIJf4l7rVeipBIRd88Z241wfs4	10	2	2.176271	41.37957676689803	1	2.1762291545215255	41.37958218074703	0
1	ChIJf4l7rVeipBIRd88Z241wfs4	10	2	2.176271	41.37957676689803	1	2.1762635829327213	41.379582176968604	0
1	ChIJf4l7rVeipBIRd88Z241wfs4	10	2	2.176271	41.37957676689803	2	2.176793798742149	41.37959572271199	0
1	ChIJf4l7rVeipBIRd88Z241wfs4	10	2	2.176271	41.37957676689803	2	2.176381846090465	41.37989309777931	0
1	ChIJf4l7rVeipBIRd88Z241wfs4	10	2	2.176271	41.37957676689803	2	2.176387929816756	41.37995209490616	0
1	ChIJf4l7rVeipBIRd88Z241wfs4	10	2	2.176271	41.37957676689803	2	2.17643330049425	41.37935921454255	3
1	ChIJf4l7rVeipBIRd88Z241wfs4	10	2	2.176271	41.37957676689803	2	2.1762555519709235	41.37919409974635	9
1	ChIJf4l7rVeipBIRd88Z241wfs4	10	2	2.176271	41.37957676689803	2	2.1764964638373714	41.37954726544538	0
1	ChIJf4l7rVeipBIRd88Z241wfs4	10	2	2.176271	41.37957676689803	2	2.1761731780757483	41.379587840788574	0
1	ChIJf4l7rVeipBIRd88Z241wfs4	10	2	2.176271	41.37957676689803	2	2.1760747649291785	41.3796274415082	0
1	ChIJf4l7rVeipBIRd88Z241wfs4	10	2	2.176271	41.37957676689803	2	2.1766025424129594	41.379734285603	0
1	ChIJf4l7rVeipBIRd88Z241wfs4	10	2	2.176271	41.37957676689803	2	2.1750790889686566	41.379635483110505	0
1	ChIJf4l7rVeipBIRd88Z241wfs4	10	2	2.176271	41.37957676689803	3	2.176329258672041	41.379666690561265	0
1	ChIJf4l7rVeipBIRd88Z241wfs4	10	2	2.176271	41.37957676689803	3	2.1763723760378784	41.37961960383009	0
1	ChIJf4l7rVeipBIRd88Z241wfs4	10	2	2.176271	41.37957676689803	3	2.1762038780353943	41.379509683220164	0
1	ChIJf4l7rVeipBIRd88Z241wfs4	10	2	2.176271	41.37957676689803	3	2.1762143373885263	41.379557091796606	0
1	ChIJf4l7rVeipBIRd88Z241wfs4	10	2	2.176271	41.37957676689803	3	2.1763481479247497	41.37968490103628	0
1	ChIJf4l7rVeipBIRd88Z241wfs4	10	2	2.176271	41.37957676689803	3	2.1762889522806317	41.37956606405024	0
1	ChIJf4l7rVeipBIRd88Z241wfs4	10	2	2.176271	41.37957676689803	3	2.1762543898861018	41.379525472118324	0
1	ChIJf4l7rVeipBIRd88Z241wfs4	10	2	2.176271	41.37957676689803	3	2.1763098596211075	41.37955390211618	0
1	ChIJf4l7rVeipBIRd88Z241wfs4	10	2	2.176271	41.37957676689803	3	2.1762918552814594	41.37964694600641	0
1	ChIJf4l7rVeipBIRd88Z241wfs4	10	2	2.176271	41.37957676689803	3	2.1763477217627734	41.379656307134624	0
1	ChIJf4l7rVeipBIRd88Z241wfs4	10	3	2.1765705507057684	41.37957676650963	0	2.1765705507057684	41.37957676650963	0
1	ChIJf4l7rVeipBIRd88Z241wfs4	10	3	2.1765705507057684	41.37957676650963	0	2.1765705507057684	41.37957676650963	0
1	ChIJf4l7rVeipBIRd88Z241wfs4	10	3	2.1765705507057684	41.37957676650963	0	2.1765705507057684	41.37957676650963	0
1	ChIJf4l7rVeipBIRd88Z241wfs4	10	3	2.1765705507057684	41.37957676650963	0	2.1765705507057684	41.37957676650963	0
1	ChIJf4l7rVeipBIRd88Z241wfs4	10	3	2.1765705507057684	41.37957676650963	0	2.1765705507057684	41.37957676650963	0
1	ChIJf4l7rVeipBIRd88Z241wfs4	10	3	2.1765705507057684	41.37957676650963	0	2.1765705507057684	41.37957676650963	0
1	ChIJf4l7rVeipBIRd88Z241wfs4	10	3	2.1765705507057684	41.37957676650963	0	2.1765705507057684	41.37957676650963	0
1	ChIJf4l7rVeipBIRd88Z241wfs4	10	3	2.1765705507057684	41.37957676650963	0	2.1765705507057684	41.37957676650963	0
1	ChIJf4l7rVeipBIRd88Z241wfs4	10	3	2.1765705507057684	41.37957676650963	0	2.1765705507057684	41.37957676650963	0
1	ChIJf4l7rVeipBIRd88Z241wfs4	10	3	2.1765705507057684	41.37957676650963	0	2.1765705507057684	41.37957676650963	0
1	ChIJf4l7rVeipBIRd88Z241wfs4	10	3	2.1765705507057684	41.37957676650963	1	2.176565424515175	41.37958769677312	0
1	ChIJf4l7rVeipBIRd88Z241wfs4	10	3	2.1765705507057684	41.37957676650963	1	2.1765685957633636	41.37958165612483	0
1	ChIJf4l7rVeipBIRd88Z241wfs4	10	3	2.1765705507057684	41.37957676650963	1	2.176587160350276	41.37959302716879	0
1	ChIJf4l7rVeipBIRd88Z241wfs4	10	3	2.1765705507057684	41.37957676650963	1	2.1765740338604807	41.37955816745973	0
1	ChIJf4l7rVeipBIRd88Z241wfs4	10	3	2.1765705507057684	41.37957676650963	1	2.17656844883651	41.3795829099803	0
1	ChIJf4l7rVeipBIRd88Z241wfs4	10	3	2.1765705507057684	41.37957676650963	1	2.1765658152744685	41.37958711787535	0
1	ChIJf4l7rVeipBIRd88Z241wfs4	10	3	2.1765705507057684	41.37957676650963	1	2.1765833838061854	41.379584035382436	0
1	ChIJf4l7rVeipBIRd88Z241wfs4	10	3	2.1765705507057684	41.37957676650963	1	2.1765681976684226	41.37957180286157	0
1	ChIJf4l7rVeipBIRd88Z241wfs4	10	3	2.1765705507057684	41.37957676650963	1	2.176570477637018	41.37957924818131	0
1	ChIJf4l7rVeipBIRd88Z241wfs4	10	3	2.1765705507057684	41.37957676650963	1	2.1765730631930817	41.379572473639264	0
1	ChIJf4l7rVeipBIRd88Z241wfs4	10	3	2.1765705507057684	41.37957676650963	2	2.176621782000555	41.37945411615289	0
1	ChIJf4l7rVeipBIRd88Z241wfs4	10	3	2.1765705507057684	41.37957676650963	2	2.1766643080700327	41.37962889293658	0
1	ChIJf4l7rVeipBIRd88Z241wfs4	10	3	2.1765705507057684	41.37957676650963	2	2.1767477641356487	41.379504639746024	0
1	ChIJf4l7rVeipBIRd88Z241wfs4	10	3	2.1765705507057684	41.37957676650963	2	2.176514440449763	41.37958995210758	0
1	ChIJf4l7rVeipBIRd88Z241wfs4	10	3	2.1765705507057684	41.37957676650963	2	2.1765287165957607	41.379519969143	0
1	ChIJf4l7rVeipBIRd88Z241wfs4	10	3	2.1765705507057684	41.37957676650963	2	2.176160499854653	41.37962436046489	0
1	ChIJf4l7rVeipBIRd88Z241wfs4	10	3	2.1765705507057684	41.37957676650963	2	2.1770006174233627	41.37947160466536	0
1	ChIJf4l7rVeipBIRd88Z241wfs4	10	3	2.1765705507057684	41.37957676650963	2	2.1768829979660396	41.37960424025601	0
1	ChIJf4l7rVeipBIRd88Z241wfs4	10	3	2.1765705507057684	41.37957676650963	2	2.176558697602421	41.3800699663515	0
1	ChIJf4l7rVeipBIRd88Z241wfs4	10	3	2.1765705507057684	41.37957676650963	2	2.1765348472153763	41.37960981428964	0
1	ChIJf4l7rVeipBIRd88Z241wfs4	10	3	2.1765705507057684	41.37957676650963	3	2.17661464842142	41.37955667800811	0
1	ChIJf4l7rVeipBIRd88Z241wfs4	10	3	2.1765705507057684	41.37957676650963	3	2.1766061236418395	41.379613939169545	0
1	ChIJf4l7rVeipBIRd88Z241wfs4	10	3	2.1765705507057684	41.37957676650963	3	2.17653046146005	41.379553018593576	0
1	ChIJf4l7rVeipBIRd88Z241wfs4	10	3	2.1765705507057684	41.37957676650963	3	2.176564097990971	41.3795651807857	0
1	ChIJf4l7rVeipBIRd88Z241wfs4	10	3	2.1765705507057684	41.37957676650963	3	2.176632547601155	41.37940654451644	0
1	ChIJf4l7rVeipBIRd88Z241wfs4	10	3	2.1765705507057684	41.37957676650963	3	2.176493146046888	41.37957165114289	0
1	ChIJf4l7rVeipBIRd88Z241wfs4	10	3	2.1765705507057684	41.37957676650963	3	2.1765739672678266	41.37953653360321	0
1	ChIJf4l7rVeipBIRd88Z241wfs4	10	3	2.1765705507057684	41.37957676650963	3	2.1765695701309182	41.37957919061515	0
1	ChIJf4l7rVeipBIRd88Z241wfs4	10	3	2.1765705507057684	41.37957676650963	3	2.176567361875124	41.37957527854138	0
1	ChIJf4l7rVeipBIRd88Z241wfs4	10	3	2.1765705507057684	41.37957676650963	3	2.1764687859931713	41.37964171843457	0
1	ChIJf4l7rVeipBIRd88Z241wfs4	10	4	2.175971450329483	41.3793519996116	0	2.175971450329483	41.3793519996116	0
1	ChIJf4l7rVeipBIRd88Z241wfs4	10	4	2.175971450329483	41.3793519996116	0	2.175971450329483	41.3793519996116	0
1	ChIJf4l7rVeipBIRd88Z241wfs4	10	4	2.175971450329483	41.3793519996116	0	2.175971450329483	41.3793519996116	0
1	ChIJf4l7rVeipBIRd88Z241wfs4	10	4	2.175971450329483	41.3793519996116	0	2.175971450329483	41.3793519996116	0
1	ChIJf4l7rVeipBIRd88Z241wfs4	10	4	2.175971450329483	41.3793519996116	0	2.175971450329483	41.3793519996116	0
1	ChIJf4l7rVeipBIRd88Z241wfs4	10	4	2.175971450329483	41.3793519996116	0	2.175971450329483	41.3793519996116	0
1	ChIJf4l7rVeipBIRd88Z241wfs4	10	4	2.175971450329483	41.3793519996116	0	2.175971450329483	41.3793519996116	0
1	ChIJf4l7rVeipBIRd88Z241wfs4	10	4	2.175971450329483	41.3793519996116	0	2.175971450329483	41.3793519996116	0
1	ChIJf4l7rVeipBIRd88Z241wfs4	10	4	2.175971450329483	41.3793519996116	0	2.175971450329483	41.3793519996116	0
1	ChIJf4l7rVeipBIRd88Z241wfs4	10	4	2.175971450329483	41.3793519996116	0	2.175971450329483	41.3793519996116	0
1	ChIJf4l7rVeipBIRd88Z241wfs4	10	4	2.175971450329483	41.3793519996116	1	2.175976452262325	41.379344460664825	0
1	ChIJf4l7rVeipBIRd88Z241wfs4	10	4	2.175971450329483	41.3793519996116	1	2.1759710608409555	41.37935100916183	0
1	ChIJf4l7rVeipBIRd88Z241wfs4	10	4	2.175971450329483	41.3793519996116	1	2.1759569608172384	41.37934702402927	0
1	ChIJf4l7rVeipBIRd88Z241wfs4	10	4	2.175971450329483	41.3793519996116	1	2.175950210966382	41.379340243785464	0
1	ChIJf4l7rVeipBIRd88Z241wfs4	10	4	2.175971450329483	41.3793519996116	1	2.175971458194482	41.37935202189435	0
1	ChIJf4l7rVeipBIRd88Z241wfs4	10	4	2.175971450329483	41.3793519996116	1	2.175960224886633	41.379340723330436	0
1	ChIJf4l7rVeipBIRd88Z241wfs4	10	4	2.175971450329483	41.3793519996116	1	2.1759657609906724	41.37934768967055	0
1	ChIJf4l7rVeipBIRd88Z241wfs4	10	4	2.175971450329483	41.3793519996116	1	2.1759532351154243	41.379368285144274	0
1	ChIJf4l7rVeipBIRd88Z241wfs4	10	4	2.175971450329483	41.3793519996116	1	2.1759707467787726	41.37935684528035	0
1	ChIJf4l7rVeipBIRd88Z241wfs4	10	4	2.175971450329483	41.3793519996116	1	2.175953429618567	41.37935403274585	0
1	ChIJf4l7rVeipBIRd88Z241wfs4	10	4	2.175971450329483	41.3793519996116	2	2.176119245258532	41.379225055961854	18
1	ChIJf4l7rVeipBIRd88Z241wfs4	10	4	2.175971450329483	41.3793519996116	2	2.1758920247843214	41.37935344798824	0
1	ChIJf4l7rVeipBIRd88Z241wfs4	10	4	2.175971450329483	41.3793519996116	2	2.175927913029547	41.37937339627207	0
1	ChIJf4l7rVeipBIRd88Z241wfs4	10	4	2.175971450329483	41.3793519996116	2	2.176792596178319	41.37907343726562	0
1	ChIJf4l7rVeipBIRd88Z241wfs4	10	4	2.175971450329483	41.3793519996116	2	2.1759449874967967	41.379315510586515	0
1	ChIJf4l7rVeipBIRd88Z241wfs4	10	4	2.175971450329483	41.3793519996116	2	2.1760784127174584	41.379367643862246	10
1	ChIJf4l7rVeipBIRd88Z241wfs4	10	4	2.175971450329483	41.3793519996116	2	2.176043629327009	41.37960541332802	0
1	ChIJf4l7rVeipBIRd88Z241wfs4	10	4	2.175971450329483	41.3793519996116	2	2.1763117499289697	41.3787593540778	0
1	ChIJf4l7rVeipBIRd88Z241wfs4	10	4	2.175971450329483	41.3793519996116	2	2.1764773852017005	41.379419980675515	12
1	ChIJf4l7rVeipBIRd88Z241wfs4	10	4	2.175971450329483	41.3793519996116	2	2.1757747088101644	41.37946348098724	0
1	ChIJf4l7rVeipBIRd88Z241wfs4	10	4	2.175971450329483	41.3793519996116	3	2.1759518640565236	41.37931388337335	0
1	ChIJf4l7rVeipBIRd88Z241wfs4	10	4	2.175971450329483	41.3793519996116	3	2.175953550109143	41.37935385781956	0
1	ChIJf4l7rVeipBIRd88Z241wfs4	10	4	2.175971450329483	41.3793519996116	3	2.1759278426232003	41.37938615922981	0
1	ChIJf4l7rVeipBIRd88Z241wfs4	10	4	2.175971450329483	41.3793519996116	3	2.1760234100641425	41.379355757453425	15
1	ChIJf4l7rVeipBIRd88Z241wfs4	10	4	2.175971450329483	41.3793519996116	3	2.176043661301716	41.37942673712184	11
1	ChIJf4l7rVeipBIRd88Z241wfs4	10	4	2.175971450329483	41.3793519996116	3	2.1759878576440297	41.3793759492263	0
1	ChIJf4l7rVeipBIRd88Z241wfs4	10	4	2.175971450329483	41.3793519996116	3	2.17600455945937	41.3792455027521	0
1	ChIJf4l7rVeipBIRd88Z241wfs4	10	4	2.175971450329483	41.3793519996116	3	2.1759863922939693	41.37937278308332	0
1	ChIJf4l7rVeipBIRd88Z241wfs4	10	4	2.175971450329483	41.3793519996116	3	2.175948319397038	41.379412694263806	0
1	ChIJf4l7rVeipBIRd88Z241wfs4	10	4	2.175971450329483	41.3793519996116	3	2.17600008677185	41.37928653657163	0
1	ChIJf4l7rVeipBIRd88Z241wfs4	10	5	2.176271	41.379352	0	2.176271	41.379352	1
1	ChIJf4l7rVeipBIRd88Z241wfs4	10	5	2.176271	41.379352	0	2.176271	41.379352	1
1	ChIJf4l7rVeipBIRd88Z241wfs4	10	5	2.176271	41.379352	0	2.176271	41.379352	1
1	ChIJf4l7rVeipBIRd88Z241wfs4	10	5	2.176271	41.379352	0	2.176271	41.379352	1
1	ChIJf4l7rVeipBIRd88Z241wfs4	10	5	2.176271	41.379352	0	2.176271	41.379352	1
1	ChIJf4l7rVeipBIRd88Z241wfs4	10	5	2.176271	41.379352	0	2.176271	41.379352	1
1	ChIJf4l7rVeipBIRd88Z241wfs4	10	5	2.176271	41.379352	0	2.176271	41.379352	1
1	ChIJf4l7rVeipBIRd88Z241wfs4	10	5	2.176271	41.379352	0	2.176271	41.379352	1
1	ChIJf4l7rVeipBIRd88Z241wfs4	10	5	2.176271	41.379352	0	2.176271	41.379352	1
1	ChIJf4l7rVeipBIRd88Z241wfs4	10	5	2.176271	41.379352	0	2.176271	41.379352	1
1	ChIJf4l7rVeipBIRd88Z241wfs4	10	5	2.176271	41.379352	1	2.1762787268482224	41.37935291398007	1
1	ChIJf4l7rVeipBIRd88Z241wfs4	10	5	2.176271	41.379352	1	2.1762796482563016	41.37935777266918	1
1	ChIJf4l7rVeipBIRd88Z241wfs4	10	5	2.176271	41.379352	1	2.1762765986352455	41.37937176293773	1
1	ChIJf4l7rVeipBIRd88Z241wfs4	10	5	2.176271	41.379352	1	2.176254843004269	41.37934323783766	1
1	ChIJf4l7rVeipBIRd88Z241wfs4	10	5	2.176271	41.379352	1	2.176257422763557	41.37934858724518	1
1	ChIJf4l7rVeipBIRd88Z241wfs4	10	5	2.176271	41.379352	1	2.176299135281536	41.37934599242194	1
1	ChIJf4l7rVeipBIRd88Z241wfs4	10	5	2.176271	41.379352	1	2.1762503755688134	41.37934571769251	1
1	ChIJf4l7rVeipBIRd88Z241wfs4	10	5	2.176271	41.379352	1	2.1762764678892523	41.37936570562545	1
1	ChIJf4l7rVeipBIRd88Z241wfs4	10	5	2.176271	41.379352	1	2.1762596798264	41.37934197587236	1
1	ChIJf4l7rVeipBIRd88Z241wfs4	10	5	2.176271	41.379352	1	2.1762711381985986	41.37935148261275	1
1	ChIJf4l7rVeipBIRd88Z241wfs4	10	5	2.176271	41.379352	2	2.1762748945341346	41.379425073965	5
1	ChIJf4l7rVeipBIRd88Z241wfs4	10	5	2.176271	41.379352	2	2.176364611111373	41.37949095888229	17
1	ChIJf4l7rVeipBIRd88Z241wfs4	10	5	2.176271	41.379352	2	2.175373443110224	41.37886540459585	0
1	ChIJf4l7rVeipBIRd88Z241wfs4	10	5	2.176271	41.379352	2	2.176594765062337	41.37962291476516	0
1	ChIJf4l7rVeipBIRd88Z241wfs4	10	5	2.176271	41.379352	2	2.1768470133874347	41.379528587731116	0
1	ChIJf4l7rVeipBIRd88Z241wfs4	10	5	2.176271	41.379352	2	2.175941629852676	41.37951694244582	0
1	ChIJf4l7rVeipBIRd88Z241wfs4	10	5	2.176271	41.379352	2	2.176243580157111	41.37908627752807	0
1	ChIJf4l7rVeipBIRd88Z241wfs4	10	5	2.176271	41.379352	2	2.176038778089203	41.37891850949418	0
1	ChIJf4l7rVeipBIRd88Z241wfs4	10	5	2.176271	41.379352	2	2.176607403088576	41.378892377232894	0
1	ChIJf4l7rVeipBIRd88Z241wfs4	10	5	2.176271	41.379352	2	2.1769594218953374	41.37933973972318	0
1	ChIJf4l7rVeipBIRd88Z241wfs4	10	5	2.176271	41.379352	3	2.176394976607041	41.37933974829071	3
1	ChIJf4l7rVeipBIRd88Z241wfs4	10	5	2.176271	41.379352	3	2.176272752881617	41.37935859293922	1
1	ChIJf4l7rVeipBIRd88Z241wfs4	10	5	2.176271	41.379352	3	2.1761337402481447	41.37936927088464	6
1	ChIJf4l7rVeipBIRd88Z241wfs4	10	5	2.176271	41.379352	3	2.1762224470593976	41.37940566662573	4
1	ChIJf4l7rVeipBIRd88Z241wfs4	10	5	2.176271	41.379352	3	2.1762140317387324	41.379347449432146	2
1	ChIJf4l7rVeipBIRd88Z241wfs4	10	5	2.176271	41.379352	3	2.1762684447579024	41.379324279414114	1
1	ChIJf4l7rVeipBIRd88Z241wfs4	10	5	2.176271	41.379352	3	2.176305222634571	41.37928490568641	4
1	ChIJf4l7rVeipBIRd88Z241wfs4	10	5	2.176271	41.379352	3	2.176260092309833	41.37933003868441	1
1	ChIJf4l7rVeipBIRd88Z241wfs4	10	5	2.176271	41.379352	3	2.17621961335241	41.37939098518173	3
1	ChIJf4l7rVeipBIRd88Z241wfs4	10	5	2.176271	41.379352	3	2.176179794679092	41.37931403255737	5
1	ChIJf4l7rVeipBIRd88Z241wfs4	10	6	2.1765705496705166	41.3793519996116	0	2.1765705496705166	41.3793519996116	14
1	ChIJf4l7rVeipBIRd88Z241wfs4	10	6	2.1765705496705166	41.3793519996116	0	2.1765705496705166	41.3793519996116	14
1	ChIJf4l7rVeipBIRd88Z241wfs4	10	6	2.1765705496705166	41.3793519996116	0	2.1765705496705166	41.3793519996116	14
1	ChIJf4l7rVeipBIRd88Z241wfs4	10	6	2.1765705496705166	41.3793519996116	0	2.1765705496705166	41.3793519996116	14
1	ChIJf4l7rVeipBIRd88Z241wfs4	10	6	2.1765705496705166	41.3793519996116	0	2.1765705496705166	41.3793519996116	14
1	ChIJf4l7rVeipBIRd88Z241wfs4	10	6	2.1765705496705166	41.3793519996116	0	2.1765705496705166	41.3793519996116	14
1	ChIJf4l7rVeipBIRd88Z241wfs4	10	6	2.1765705496705166	41.3793519996116	0	2.1765705496705166	41.3793519996116	14
1	ChIJf4l7rVeipBIRd88Z241wfs4	10	6	2.1765705496705166	41.3793519996116	0	2.1765705496705166	41.3793519996116	14
1	ChIJf4l7rVeipBIRd88Z241wfs4	10	6	2.1765705496705166	41.3793519996116	0	2.1765705496705166	41.3793519996116	14
1	ChIJf4l7rVeipBIRd88Z241wfs4	10	6	2.1765705496705166	41.3793519996116	0	2.1765705496705166	41.3793519996116	14
1	ChIJf4l7rVeipBIRd88Z241wfs4	10	6	2.1765705496705166	41.3793519996116	1	2.1765785206260553	41.37933749403629	13
1	ChIJf4l7rVeipBIRd88Z241wfs4	10	6	2.1765705496705166	41.3793519996116	1	2.1765708021764283	41.37935150653228	14
1	ChIJf4l7rVeipBIRd88Z241wfs4	10	6	2.1765705496705166	41.3793519996116	1	2.1765499293049873	41.37935079479692	12
1	ChIJf4l7rVeipBIRd88Z241wfs4	10	6	2.1765705496705166	41.3793519996116	1	2.17657344988721	41.37933583092156	11
1	ChIJf4l7rVeipBIRd88Z241wfs4	10	6	2.1765705496705166	41.3793519996116	1	2.1765638559008003	41.37935051885398	14
1	ChIJf4l7rVeipBIRd88Z241wfs4	10	6	2.1765705496705166	41.3793519996116	1	2.1765751329116747	41.379346399642486	14
1	ChIJf4l7rVeipBIRd88Z241wfs4	10	6	2.1765705496705166	41.3793519996116	1	2.176557944938321	41.37934943284516	13
1	ChIJf4l7rVeipBIRd88Z241wfs4	10	6	2.1765705496705166	41.3793519996116	1	2.176574009412759	41.379355646372716	14
1	ChIJf4l7rVeipBIRd88Z241wfs4	10	6	2.1765705496705166	41.3793519996116	1	2.1765743684722283	41.3793535669207	14
1	ChIJf4l7rVeipBIRd88Z241wfs4	10	6	2.1765705496705166	41.3793519996116	1	2.17656708401197	41.37934962229264	14
1	ChIJf4l7rVeipBIRd88Z241wfs4	10	6	2.1765705496705166	41.3793519996116	2	2.1765869308062884	41.37945479326358	0
1	ChIJf4l7rVeipBIRd88Z241wfs4	10	6	2.1765705496705166	41.3793519996116	2	2.176756048232022	41.379317289334125	0
1	ChIJf4l7rVeipBIRd88Z241wfs4	10	6	2.1765705496705166	41.3793519996116	2	2.176798843207786	41.37906649615784	0
1	ChIJf4l7rVeipBIRd88Z241wfs4	10	6	2.1765705496705166	41.3793519996116	2	2.1766041074529277	41.37913505955262	0
1	ChIJf4l7rVeipBIRd88Z241wfs4	10	6	2.1765705496705166	41.3793519996116	2	2.176443989460762	41.3791970666388	13
1	ChIJf4l7rVeipBIRd88Z241wfs4	10	6	2.1765705496705166	41.3793519996116	2	2.1763744118696358	41.379499942652885	18
1	ChIJf4l7rVeipBIRd88Z241wfs4	10	6	2.1765705496705166	41.3793519996116	2	2.176648008644854	41.379798207214975	0
1	ChIJf4l7rVeipBIRd88Z241wfs4	10	6	2.1765705496705166	41.3793519996116	2	2.1768397099324512	41.37934515190967	0
1	ChIJf4l7rVeipBIRd88Z241wfs4	10	6	2.1765705496705166	41.3793519996116	2	2.1765409858982765	41.378596528545856	0
1	ChIJf4l7rVeipBIRd88Z241wfs4	10	6	2.1765705496705166	41.3793519996116	2	2.1766886986417227	41.37917570101847	0
1	ChIJf4l7rVeipBIRd88Z241wfs4	10	6	2.1765705496705166	41.3793519996116	3	2.1765488438590377	41.37934942844972	12
1	ChIJf4l7rVeipBIRd88Z241wfs4	10	6	2.1765705496705166	41.3793519996116	3	2.176610753148377	41.37932154205258	17
1	ChIJf4l7rVeipBIRd88Z241wfs4	10	6	2.1765705496705166	41.3793519996116	3	2.176570285336705	41.379405388237295	19
1	ChIJf4l7rVeipBIRd88Z241wfs4	10	6	2.1765705496705166	41.3793519996116	3	2.1765484258405206	41.3793528371803	12
1	ChIJf4l7rVeipBIRd88Z241wfs4	10	6	2.1765705496705166	41.3793519996116	3	2.1765493567816585	41.37936853098448	14
1	ChIJf4l7rVeipBIRd88Z241wfs4	10	6	2.1765705496705166	41.3793519996116	3	2.1765266684036955	41.379380705646795	10
1	ChIJf4l7rVeipBIRd88Z241wfs4	10	6	2.1765705496705166	41.3793519996116	3	2.1765925580757814	41.37937659177074	15
1	ChIJf4l7rVeipBIRd88Z241wfs4	10	6	2.1765705496705166	41.3793519996116	3	2.176577040609431	41.379384864725075	15
1	ChIJf4l7rVeipBIRd88Z241wfs4	10	6	2.1765705496705166	41.3793519996116	3	2.1764895691062707	41.37941882492248	12
1	ChIJf4l7rVeipBIRd88Z241wfs4	10	6	2.1765705496705166	41.3793519996116	3	2.1766145202813907	41.37935849117141	15
1	ChIJf4l7rVeipBIRd88Z241wfs4	10	7	2.175971451364724	41.37912723271356	0	2.175971451364724	41.37912723271356	0
1	ChIJf4l7rVeipBIRd88Z241wfs4	10	7	2.175971451364724	41.37912723271356	0	2.175971451364724	41.37912723271356	0
1	ChIJf4l7rVeipBIRd88Z241wfs4	10	7	2.175971451364724	41.37912723271356	0	2.175971451364724	41.37912723271356	0
1	ChIJf4l7rVeipBIRd88Z241wfs4	10	7	2.175971451364724	41.37912723271356	0	2.175971451364724	41.37912723271356	0
1	ChIJf4l7rVeipBIRd88Z241wfs4	10	7	2.175971451364724	41.37912723271356	0	2.175971451364724	41.37912723271356	0
1	ChIJf4l7rVeipBIRd88Z241wfs4	10	7	2.175971451364724	41.37912723271356	0	2.175971451364724	41.37912723271356	0
1	ChIJf4l7rVeipBIRd88Z241wfs4	10	7	2.175971451364724	41.37912723271356	0	2.175971451364724	41.37912723271356	0
1	ChIJf4l7rVeipBIRd88Z241wfs4	10	7	2.175971451364724	41.37912723271356	0	2.175971451364724	41.37912723271356	0
1	ChIJf4l7rVeipBIRd88Z241wfs4	10	7	2.175971451364724	41.37912723271356	0	2.175971451364724	41.37912723271356	0
1	ChIJf4l7rVeipBIRd88Z241wfs4	10	7	2.175971451364724	41.37912723271356	0	2.175971451364724	41.37912723271356	0
1	ChIJf4l7rVeipBIRd88Z241wfs4	10	7	2.175971451364724	41.37912723271356	1	2.1759765825433925	41.3791262278756	0
1	ChIJf4l7rVeipBIRd88Z241wfs4	10	7	2.175971451364724	41.37912723271356	1	2.175955918118586	41.37912839861606	0
1	ChIJf4l7rVeipBIRd88Z241wfs4	10	7	2.175971451364724	41.37912723271356	1	2.1759709334227426	41.379140081886376	0
1	ChIJf4l7rVeipBIRd88Z241wfs4	10	7	2.175971451364724	41.37912723271356	1	2.1759914833594336	41.37911116224434	0
1	ChIJf4l7rVeipBIRd88Z241wfs4	10	7	2.175971451364724	41.37912723271356	1	2.175967109965013	41.37914236527973	0
1	ChIJf4l7rVeipBIRd88Z241wfs4	10	7	2.175971451364724	41.37912723271356	1	2.1759507690188595	41.37911909563918	0
1	ChIJf4l7rVeipBIRd88Z241wfs4	10	7	2.175971451364724	41.37912723271356	1	2.175957900656392	41.379133174116696	0
1	ChIJf4l7rVeipBIRd88Z241wfs4	10	7	2.175971451364724	41.37912723271356	1	2.1759571123959702	41.37912967746465	0
1	ChIJf4l7rVeipBIRd88Z241wfs4	10	7	2.175971451364724	41.37912723271356	1	2.175970675156333	41.37912748049491	0
1	ChIJf4l7rVeipBIRd88Z241wfs4	10	7	2.175971451364724	41.37912723271356	1	2.175987410499963	41.37912692228445	0
1	ChIJf4l7rVeipBIRd88Z241wfs4	10	7	2.175971451364724	41.37912723271356	2	2.1760791757923648	41.37923562706267	0
1	ChIJf4l7rVeipBIRd88Z241wfs4	10	7	2.175971451364724	41.37912723271356	2	2.175541321393779	41.37932531895628	0
1	ChIJf4l7rVeipBIRd88Z241wfs4	10	7	2.175971451364724	41.37912723271356	2	2.175534620976385	41.37921523937912	0
1	ChIJf4l7rVeipBIRd88Z241wfs4	10	7	2.175971451364724	41.37912723271356	2	2.1760850271554064	41.37912583901843	0
1	ChIJf4l7rVeipBIRd88Z241wfs4	10	7	2.175971451364724	41.37912723271356	2	2.1757856282861567	41.37888785420804	0
1	ChIJf4l7rVeipBIRd88Z241wfs4	10	7	2.175971451364724	41.37912723271356	2	2.1761054354656295	41.37946771173326	14
1	ChIJf4l7rVeipBIRd88Z241wfs4	10	7	2.175971451364724	41.37912723271356	2	2.1760905971972564	41.37918440615978	0
1	ChIJf4l7rVeipBIRd88Z241wfs4	10	7	2.175971451364724	41.37912723271356	2	2.176628436659739	41.378765364296285	0
1	ChIJf4l7rVeipBIRd88Z241wfs4	10	7	2.175971451364724	41.37912723271356	2	2.176105098518441	41.37914847965215	0
1	ChIJf4l7rVeipBIRd88Z241wfs4	10	7	2.175971451364724	41.37912723271356	2	2.1762886582803387	41.37888955577362	0
1	ChIJf4l7rVeipBIRd88Z241wfs4	10	7	2.175971451364724	41.37912723271356	3	2.175955665746513	41.37911091497668	0
1	ChIJf4l7rVeipBIRd88Z241wfs4	10	7	2.175971451364724	41.37912723271356	3	2.176052756955473	41.37911242753449	0
1	ChIJf4l7rVeipBIRd88Z241wfs4	10	7	2.175971451364724	41.37912723271356	3	2.1760213140682025	41.37912523452883	0
1	ChIJf4l7rVeipBIRd88Z241wfs4	10	7	2.175971451364724	41.37912723271356	3	2.175953607579801	41.37901539036705	0
1	ChIJf4l7rVeipBIRd88Z241wfs4	10	7	2.175971451364724	41.37912723271356	3	2.1761195207661537	41.379234373464605	16
1	ChIJf4l7rVeipBIRd88Z241wfs4	10	7	2.175971451364724	41.37912723271356	3	2.175847033205723	41.37904326023432	0
1	ChIJf4l7rVeipBIRd88Z241wfs4	10	7	2.175971451364724	41.37912723271356	3	2.175970980911095	41.37912797249763	0
1	ChIJf4l7rVeipBIRd88Z241wfs4	10	7	2.175971451364724	41.37912723271356	3	2.1759735552726744	41.37907750434357	0
1	ChIJf4l7rVeipBIRd88Z241wfs4	10	7	2.175971451364724	41.37912723271356	3	2.1760790404300363	41.37916328373939	0
1	ChIJf4l7rVeipBIRd88Z241wfs4	10	7	2.175971451364724	41.37912723271356	3	2.1759123940325598	41.37912384914313	0
1	ChIJf4l7rVeipBIRd88Z241wfs4	10	8	2.176271	41.379127233101954	0	2.176271	41.379127233101954	15
1	ChIJf4l7rVeipBIRd88Z241wfs4	10	8	2.176271	41.379127233101954	0	2.176271	41.379127233101954	15
1	ChIJf4l7rVeipBIRd88Z241wfs4	10	8	2.176271	41.379127233101954	0	2.176271	41.379127233101954	15
1	ChIJf4l7rVeipBIRd88Z241wfs4	10	8	2.176271	41.379127233101954	0	2.176271	41.379127233101954	15
1	ChIJf4l7rVeipBIRd88Z241wfs4	10	8	2.176271	41.379127233101954	0	2.176271	41.379127233101954	15
1	ChIJf4l7rVeipBIRd88Z241wfs4	10	8	2.176271	41.379127233101954	0	2.176271	41.379127233101954	15
1	ChIJf4l7rVeipBIRd88Z241wfs4	10	8	2.176271	41.379127233101954	0	2.176271	41.379127233101954	15
1	ChIJf4l7rVeipBIRd88Z241wfs4	10	8	2.176271	41.379127233101954	0	2.176271	41.379127233101954	15
1	ChIJf4l7rVeipBIRd88Z241wfs4	10	8	2.176271	41.379127233101954	0	2.176271	41.379127233101954	15
1	ChIJf4l7rVeipBIRd88Z241wfs4	10	8	2.176271	41.379127233101954	0	2.176271	41.379127233101954	15
1	ChIJf4l7rVeipBIRd88Z241wfs4	10	8	2.176271	41.379127233101954	1	2.1762728648649046	41.37912786017586	15
1	ChIJf4l7rVeipBIRd88Z241wfs4	10	8	2.176271	41.379127233101954	1	2.1762863071198963	41.379117626710645	19
1	ChIJf4l7rVeipBIRd88Z241wfs4	10	8	2.176271	41.379127233101954	1	2.176264108570874	41.379128547567255	15
1	ChIJf4l7rVeipBIRd88Z241wfs4	10	8	2.176271	41.379127233101954	1	2.1762591653185996	41.37913600706232	15
1	ChIJf4l7rVeipBIRd88Z241wfs4	10	8	2.176271	41.379127233101954	1	2.1762681334159995	41.37912639888435	15
1	ChIJf4l7rVeipBIRd88Z241wfs4	10	8	2.176271	41.379127233101954	1	2.1762812544817356	41.37913107917086	15
1	ChIJf4l7rVeipBIRd88Z241wfs4	10	8	2.176271	41.379127233101954	1	2.176272093845721	41.37912466234513	16
1	ChIJf4l7rVeipBIRd88Z241wfs4	10	8	2.176271	41.379127233101954	1	2.1762694879114064	41.37912814012545	15
1	ChIJf4l7rVeipBIRd88Z241wfs4	10	8	2.176271	41.379127233101954	1	2.1762435775420927	41.37912847968676	18
1	ChIJf4l7rVeipBIRd88Z241wfs4	10	8	2.176271	41.379127233101954	1	2.1762606399755	41.37912219668528	18
1	ChIJf4l7rVeipBIRd88Z241wfs4	10	8	2.176271	41.379127233101954	2	2.1761891720002438	41.37903373536881	0
1	ChIJf4l7rVeipBIRd88Z241wfs4	10	8	2.176271	41.379127233101954	2	2.1763732657230355	41.37940274370816	4
1	ChIJf4l7rVeipBIRd88Z241wfs4	10	8	2.176271	41.379127233101954	2	2.1764614977587824	41.379278975193024	7
1	ChIJf4l7rVeipBIRd88Z241wfs4	10	8	2.176271	41.379127233101954	2	2.1762479729383895	41.37921576633075	5
1	ChIJf4l7rVeipBIRd88Z241wfs4	10	8	2.176271	41.379127233101954	2	2.175953060535298	41.37929036620352	0
1	ChIJf4l7rVeipBIRd88Z241wfs4	10	8	2.176271	41.379127233101954	2	2.176273057486817	41.37912889020506	15
1	ChIJf4l7rVeipBIRd88Z241wfs4	10	8	2.176271	41.379127233101954	2	2.176413009484194	41.37903256091353	0
1	ChIJf4l7rVeipBIRd88Z241wfs4	10	8	2.176271	41.379127233101954	2	2.176190562583896	41.3791461604055	20
1	ChIJf4l7rVeipBIRd88Z241wfs4	10	8	2.176271	41.379127233101954	2	2.176260191181157	41.37923282596215	4
1	ChIJf4l7rVeipBIRd88Z241wfs4	10	8	2.176271	41.379127233101954	2	2.1762523499610342	41.37897833930075	0
1	ChIJf4l7rVeipBIRd88Z241wfs4	10	8	2.176271	41.379127233101954	3	2.1761761139134825	41.37920982031842	12
1	ChIJf4l7rVeipBIRd88Z241wfs4	10	8	2.176271	41.379127233101954	3	2.176319976599348	41.37924659107358	4
1	ChIJf4l7rVeipBIRd88Z241wfs4	10	8	2.176271	41.379127233101954	3	2.176247376060024	41.37913831271538	15
1	ChIJf4l7rVeipBIRd88Z241wfs4	10	8	2.176271	41.379127233101954	3	2.1763146745082014	41.37913594943735	10
1	ChIJf4l7rVeipBIRd88Z241wfs4	10	8	2.176271	41.379127233101954	3	2.176249012421761	41.37914875780553	14
1	ChIJf4l7rVeipBIRd88Z241wfs4	10	8	2.176271	41.379127233101954	3	2.1762852615360933	41.37909703128112	0
1	ChIJf4l7rVeipBIRd88Z241wfs4	10	8	2.176271	41.379127233101954	3	2.1763090214906105	41.379192722284024	7
1	ChIJf4l7rVeipBIRd88Z241wfs4	10	8	2.176271	41.379127233101954	3	2.1762872079501303	41.37907856796211	0
1	ChIJf4l7rVeipBIRd88Z241wfs4	10	8	2.176271	41.379127233101954	3	2.176204192875401	41.379223777479254	7
1	ChIJf4l7rVeipBIRd88Z241wfs4	10	8	2.176271	41.379127233101954	3	2.1761659409586955	41.37918223827479	15
1	ChIJf4l7rVeipBIRd88Z241wfs4	10	9	2.1765705486352753	41.37912723271356	0	2.1765705486352753	41.37912723271356	0
1	ChIJf4l7rVeipBIRd88Z241wfs4	10	9	2.1765705486352753	41.37912723271356	0	2.1765705486352753	41.37912723271356	0
1	ChIJf4l7rVeipBIRd88Z241wfs4	10	9	2.1765705486352753	41.37912723271356	0	2.1765705486352753	41.37912723271356	0
1	ChIJf4l7rVeipBIRd88Z241wfs4	10	9	2.1765705486352753	41.37912723271356	0	2.1765705486352753	41.37912723271356	0
1	ChIJf4l7rVeipBIRd88Z241wfs4	10	9	2.1765705486352753	41.37912723271356	0	2.1765705486352753	41.37912723271356	0
1	ChIJf4l7rVeipBIRd88Z241wfs4	10	9	2.1765705486352753	41.37912723271356	0	2.1765705486352753	41.37912723271356	0
1	ChIJf4l7rVeipBIRd88Z241wfs4	10	9	2.1765705486352753	41.37912723271356	0	2.1765705486352753	41.37912723271356	0
1	ChIJf4l7rVeipBIRd88Z241wfs4	10	9	2.1765705486352753	41.37912723271356	0	2.1765705486352753	41.37912723271356	0
1	ChIJf4l7rVeipBIRd88Z241wfs4	10	9	2.1765705486352753	41.37912723271356	0	2.1765705486352753	41.37912723271356	0
1	ChIJf4l7rVeipBIRd88Z241wfs4	10	9	2.1765705486352753	41.37912723271356	0	2.1765705486352753	41.37912723271356	0
1	ChIJf4l7rVeipBIRd88Z241wfs4	10	9	2.1765705486352753	41.37912723271356	1	2.1765690281345784	41.37912767795258	0
1	ChIJf4l7rVeipBIRd88Z241wfs4	10	9	2.1765705486352753	41.37912723271356	1	2.1765693406730735	41.379123387696396	0
1	ChIJf4l7rVeipBIRd88Z241wfs4	10	9	2.1765705486352753	41.37912723271356	1	2.1765619658683795	41.37911916288366	0
1	ChIJf4l7rVeipBIRd88Z241wfs4	10	9	2.1765705486352753	41.37912723271356	1	2.1765707183707868	41.379126914274195	0
1	ChIJf4l7rVeipBIRd88Z241wfs4	10	9	2.1765705486352753	41.37912723271356	1	2.176569897401387	41.37912858550395	0
1	ChIJf4l7rVeipBIRd88Z241wfs4	10	9	2.1765705486352753	41.37912723271356	1	2.1765727677003492	41.37913068898039	0
1	ChIJf4l7rVeipBIRd88Z241wfs4	10	9	2.1765705486352753	41.37912723271356	1	2.176573968415323	41.37911071616042	0
1	ChIJf4l7rVeipBIRd88Z241wfs4	10	9	2.1765705486352753	41.37912723271356	1	2.1765737221224644	41.37912519892428	0
1	ChIJf4l7rVeipBIRd88Z241wfs4	10	9	2.1765705486352753	41.37912723271356	1	2.176563672133244	41.37912642290849	0
1	ChIJf4l7rVeipBIRd88Z241wfs4	10	9	2.1765705486352753	41.37912723271356	1	2.1765843647255205	41.37913678882153	0
1	ChIJf4l7rVeipBIRd88Z241wfs4	10	9	2.1765705486352753	41.37912723271356	2	2.176652011845389	41.37946825108382	0
1	ChIJf4l7rVeipBIRd88Z241wfs4	10	9	2.1765705486352753	41.37912723271356	2	2.176338872670383	41.379235310084006	7
1	ChIJf4l7rVeipBIRd88Z241wfs4	10	9	2.1765705486352753	41.37912723271356	2	2.1764382609821142	41.379404707110176	4
1	ChIJf4l7rVeipBIRd88Z241wfs4	10	9	2.1765705486352753	41.37912723271356	2	2.1766969602783846	41.37893809648829	0
1	ChIJf4l7rVeipBIRd88Z241wfs4	10	9	2.1765705486352753	41.37912723271356	2	2.1756798526302075	41.378770818682426	0
1	ChIJf4l7rVeipBIRd88Z241wfs4	10	9	2.1765705486352753	41.37912723271356	2	2.175892914510887	41.378879284947956	0
1	ChIJf4l7rVeipBIRd88Z241wfs4	10	9	2.1765705486352753	41.37912723271356	2	2.1763928193037714	41.379121505603756	17
1	ChIJf4l7rVeipBIRd88Z241wfs4	10	9	2.1765705486352753	41.37912723271356	2	2.1764781420619164	41.3790821335212	0
1	ChIJf4l7rVeipBIRd88Z241wfs4	10	9	2.1765705486352753	41.37912723271356	2	2.1759227520580415	41.37853302432074	0
1	ChIJf4l7rVeipBIRd88Z241wfs4	10	9	2.1765705486352753	41.37912723271356	2	2.1767581562310045	41.37909515001759	0
1	ChIJf4l7rVeipBIRd88Z241wfs4	10	9	2.1765705486352753	41.37912723271356	3	2.176558040170518	41.37910033345218	0
1	ChIJf4l7rVeipBIRd88Z241wfs4	10	9	2.1765705486352753	41.37912723271356	3	2.1765542470773775	41.37915978590154	18
1	ChIJf4l7rVeipBIRd88Z241wfs4	10	9	2.1765705486352753	41.37912723271356	3	2.1763763914920164	41.37916366187449	15
1	ChIJf4l7rVeipBIRd88Z241wfs4	10	9	2.1765705486352753	41.37912723271356	3	2.1766109531186504	41.37913931694787	0
1	ChIJf4l7rVeipBIRd88Z241wfs4	10	9	2.1765705486352753	41.37912723271356	3	2.1765522941885806	41.37912477196918	0
1	ChIJf4l7rVeipBIRd88Z241wfs4	10	9	2.1765705486352753	41.37912723271356	3	2.1763625576488375	41.37917799282048	8
1	ChIJf4l7rVeipBIRd88Z241wfs4	10	9	2.1765705486352753	41.37912723271356	3	2.1767457954024345	41.37901692448314	0
1	ChIJf4l7rVeipBIRd88Z241wfs4	10	9	2.1765705486352753	41.37912723271356	3	2.1765091393887412	41.379123984893155	0
1	ChIJf4l7rVeipBIRd88Z241wfs4	10	9	2.1765705486352753	41.37912723271356	3	2.176713911291088	41.37908267959911	0
1	ChIJf4l7rVeipBIRd88Z241wfs4	10	9	2.1765705486352753	41.37912723271356	3	2.17657588159366	41.37908674199424	0
1	ChIJk0zF39hx5kcRBn8cQxes_3M	9	1	2.3369015977306615	48.85412796639347	0	2.3369015977306615	48.85412796639347	0
1	ChIJk0zF39hx5kcRBn8cQxes_3M	9	1	2.3369015977306615	48.85412796639347	0	2.3369015977306615	48.85412796639347	0
1	ChIJk0zF39hx5kcRBn8cQxes_3M	9	1	2.3369015977306615	48.85412796639347	0	2.3369015977306615	48.85412796639347	0
1	ChIJk0zF39hx5kcRBn8cQxes_3M	9	1	2.3369015977306615	48.85412796639347	0	2.3369015977306615	48.85412796639347	0
1	ChIJk0zF39hx5kcRBn8cQxes_3M	9	1	2.3369015977306615	48.85412796639347	0	2.3369015977306615	48.85412796639347	0
1	ChIJk0zF39hx5kcRBn8cQxes_3M	9	1	2.3369015977306615	48.85412796639347	0	2.3369015977306615	48.85412796639347	0
1	ChIJk0zF39hx5kcRBn8cQxes_3M	9	1	2.3369015977306615	48.85412796639347	0	2.3369015977306615	48.85412796639347	0
1	ChIJk0zF39hx5kcRBn8cQxes_3M	9	1	2.3369015977306615	48.85412796639347	0	2.3369015977306615	48.85412796639347	0
1	ChIJk0zF39hx5kcRBn8cQxes_3M	9	1	2.3369015977306615	48.85412796639347	0	2.3369015977306615	48.85412796639347	0
1	ChIJk0zF39hx5kcRBn8cQxes_3M	9	1	2.3369015977306615	48.85412796639347	0	2.3369015977306615	48.85412796639347	0
1	ChIJk0zF39hx5kcRBn8cQxes_3M	9	1	2.3369015977306615	48.85412796639347	1	2.33690308113848	48.85413104494937	0
1	ChIJk0zF39hx5kcRBn8cQxes_3M	9	1	2.3369015977306615	48.85412796639347	1	2.336933277255022	48.85413571398748	0
1	ChIJk0zF39hx5kcRBn8cQxes_3M	9	1	2.3369015977306615	48.85412796639347	1	2.336885545479442	48.85411707726958	0
1	ChIJk0zF39hx5kcRBn8cQxes_3M	9	1	2.3369015977306615	48.85412796639347	1	2.3368927044531986	48.85412176505294	0
1	ChIJk0zF39hx5kcRBn8cQxes_3M	9	1	2.3369015977306615	48.85412796639347	1	2.3369064668998503	48.8541293584109	0
1	ChIJk0zF39hx5kcRBn8cQxes_3M	9	1	2.3369015977306615	48.85412796639347	1	2.336914292816168	48.854129908246314	0
1	ChIJk0zF39hx5kcRBn8cQxes_3M	9	1	2.3369015977306615	48.85412796639347	1	2.336927124657227	48.85412261280348	0
1	ChIJk0zF39hx5kcRBn8cQxes_3M	9	1	2.3369015977306615	48.85412796639347	1	2.3368928435299106	48.85413853967991	0
1	ChIJk0zF39hx5kcRBn8cQxes_3M	9	1	2.3369015977306615	48.85412796639347	1	2.336893937026749	48.85412875151973	0
1	ChIJk0zF39hx5kcRBn8cQxes_3M	9	1	2.3369015977306615	48.85412796639347	1	2.3368974276662886	48.85412487553221	0
1	ChIJk0zF39hx5kcRBn8cQxes_3M	9	1	2.3369015977306615	48.85412796639347	2	2.337840891247624	48.854881485223636	0
1	ChIJk0zF39hx5kcRBn8cQxes_3M	9	1	2.3369015977306615	48.85412796639347	2	2.337269984300895	48.85434438294034	0
1	ChIJk0zF39hx5kcRBn8cQxes_3M	9	1	2.3369015977306615	48.85412796639347	2	2.337271156135247	48.85418036253994	0
1	ChIJk0zF39hx5kcRBn8cQxes_3M	9	1	2.3369015977306615	48.85412796639347	2	2.337258143536612	48.8543274838321	0
1	ChIJk0zF39hx5kcRBn8cQxes_3M	9	1	2.3369015977306615	48.85412796639347	2	2.3363336480529706	48.85410129501462	0
1	ChIJk0zF39hx5kcRBn8cQxes_3M	9	1	2.3369015977306615	48.85412796639347	2	2.337150631542524	48.8540230628402	0
1	ChIJk0zF39hx5kcRBn8cQxes_3M	9	1	2.3369015977306615	48.85412796639347	2	2.3367000459692853	48.854210023908244	0
1	ChIJk0zF39hx5kcRBn8cQxes_3M	9	1	2.3369015977306615	48.85412796639347	2	2.3368113419937138	48.854307483904705	0
1	ChIJk0zF39hx5kcRBn8cQxes_3M	9	1	2.3369015977306615	48.85412796639347	2	2.3371350904141517	48.85409751061982	0
1	ChIJk0zF39hx5kcRBn8cQxes_3M	9	1	2.3369015977306615	48.85412796639347	2	2.3367659754072663	48.854099393302135	0
1	ChIJk0zF39hx5kcRBn8cQxes_3M	9	1	2.3369015977306615	48.85412796639347	3	2.33691070090437	48.85414779595822	0
1	ChIJk0zF39hx5kcRBn8cQxes_3M	9	1	2.3369015977306615	48.85412796639347	3	2.3370404908218467	48.85410575713194	0
1	ChIJk0zF39hx5kcRBn8cQxes_3M	9	1	2.3369015977306615	48.85412796639347	3	2.336915785471735	48.85412749867169	0
1	ChIJk0zF39hx5kcRBn8cQxes_3M	9	1	2.3369015977306615	48.85412796639347	3	2.3367816018037884	48.85404108187523	0
1	ChIJk0zF39hx5kcRBn8cQxes_3M	9	1	2.3369015977306615	48.85412796639347	3	2.3368786716837584	48.8541429364015	0
1	ChIJk0zF39hx5kcRBn8cQxes_3M	9	1	2.3369015977306615	48.85412796639347	3	2.336943874800956	48.85415302902434	0
1	ChIJk0zF39hx5kcRBn8cQxes_3M	9	1	2.3369015977306615	48.85412796639347	3	2.3369308945741536	48.85415388193322	0
1	ChIJk0zF39hx5kcRBn8cQxes_3M	9	1	2.3369015977306615	48.85412796639347	3	2.3369106246750726	48.85411905244206	0
1	ChIJk0zF39hx5kcRBn8cQxes_3M	9	1	2.3369015977306615	48.85412796639347	3	2.336837694120842	48.85423071846022	0
1	ChIJk0zF39hx5kcRBn8cQxes_3M	9	1	2.3369015977306615	48.85412796639347	3	2.337039942634056	48.85404482714195	0
1	ChIJk0zF39hx5kcRBn8cQxes_3M	9	2	2.3372432	48.854127966898034	0	2.3372432	48.854127966898034	0
1	ChIJk0zF39hx5kcRBn8cQxes_3M	9	2	2.3372432	48.854127966898034	0	2.3372432	48.854127966898034	0
1	ChIJk0zF39hx5kcRBn8cQxes_3M	9	2	2.3372432	48.854127966898034	0	2.3372432	48.854127966898034	0
1	ChIJk0zF39hx5kcRBn8cQxes_3M	9	2	2.3372432	48.854127966898034	0	2.3372432	48.854127966898034	0
1	ChIJk0zF39hx5kcRBn8cQxes_3M	9	2	2.3372432	48.854127966898034	0	2.3372432	48.854127966898034	0
1	ChIJk0zF39hx5kcRBn8cQxes_3M	9	2	2.3372432	48.854127966898034	0	2.3372432	48.854127966898034	0
1	ChIJk0zF39hx5kcRBn8cQxes_3M	9	2	2.3372432	48.854127966898034	0	2.3372432	48.854127966898034	0
1	ChIJk0zF39hx5kcRBn8cQxes_3M	9	2	2.3372432	48.854127966898034	0	2.3372432	48.854127966898034	0
1	ChIJk0zF39hx5kcRBn8cQxes_3M	9	2	2.3372432	48.854127966898034	0	2.3372432	48.854127966898034	0
1	ChIJk0zF39hx5kcRBn8cQxes_3M	9	2	2.3372432	48.854127966898034	0	2.3372432	48.854127966898034	0
1	ChIJk0zF39hx5kcRBn8cQxes_3M	9	2	2.3372432	48.854127966898034	1	2.337253067598389	48.85412203955454	0
1	ChIJk0zF39hx5kcRBn8cQxes_3M	9	2	2.3372432	48.854127966898034	1	2.337212382219938	48.854116788790144	0
1	ChIJk0zF39hx5kcRBn8cQxes_3M	9	2	2.3372432	48.854127966898034	1	2.337232917045102	48.85412178876289	0
1	ChIJk0zF39hx5kcRBn8cQxes_3M	9	2	2.3372432	48.854127966898034	1	2.3372457557339996	48.85412735300446	0
1	ChIJk0zF39hx5kcRBn8cQxes_3M	9	2	2.3372432	48.854127966898034	1	2.3372393992069966	48.85412900494663	0
1	ChIJk0zF39hx5kcRBn8cQxes_3M	9	2	2.3372432	48.854127966898034	1	2.337258369669384	48.8541251856501	0
1	ChIJk0zF39hx5kcRBn8cQxes_3M	9	2	2.3372432	48.854127966898034	1	2.337237004564735	48.85412882474396	0
1	ChIJk0zF39hx5kcRBn8cQxes_3M	9	2	2.3372432	48.854127966898034	1	2.337247671494846	48.854122408213804	0
1	ChIJk0zF39hx5kcRBn8cQxes_3M	9	2	2.3372432	48.854127966898034	1	2.337257445366757	48.854118171980964	0
1	ChIJk0zF39hx5kcRBn8cQxes_3M	9	2	2.3372432	48.854127966898034	1	2.3372273084928534	48.85414857046023	0
1	ChIJk0zF39hx5kcRBn8cQxes_3M	9	2	2.3372432	48.854127966898034	2	2.3376753682738376	48.85402293967159	0
1	ChIJk0zF39hx5kcRBn8cQxes_3M	9	2	2.3372432	48.854127966898034	2	2.337153649040778	48.85409242463141	0
1	ChIJk0zF39hx5kcRBn8cQxes_3M	9	2	2.3372432	48.854127966898034	2	2.336946605915706	48.85390244049303	0
1	ChIJk0zF39hx5kcRBn8cQxes_3M	9	2	2.3372432	48.854127966898034	2	2.3365904711013887	48.85423025499188	0
1	ChIJk0zF39hx5kcRBn8cQxes_3M	9	2	2.3372432	48.854127966898034	2	2.337290736820139	48.85413462987296	0
1	ChIJk0zF39hx5kcRBn8cQxes_3M	9	2	2.3372432	48.854127966898034	2	2.336998526512551	48.854127876627736	0
1	ChIJk0zF39hx5kcRBn8cQxes_3M	9	2	2.3372432	48.854127966898034	2	2.337220563909667	48.85406843963265	0
1	ChIJk0zF39hx5kcRBn8cQxes_3M	9	2	2.3372432	48.854127966898034	2	2.3373563984755448	48.854046277742555	17
1	ChIJk0zF39hx5kcRBn8cQxes_3M	9	2	2.3372432	48.854127966898034	2	2.337773850077559	48.85444666697942	0
1	ChIJk0zF39hx5kcRBn8cQxes_3M	9	2	2.3372432	48.854127966898034	2	2.337206796323537	48.85410481171245	0
1	ChIJk0zF39hx5kcRBn8cQxes_3M	9	2	2.3372432	48.854127966898034	3	2.337246327842179	48.85413096533616	0
1	ChIJk0zF39hx5kcRBn8cQxes_3M	9	2	2.3372432	48.854127966898034	3	2.3372210751709432	48.85412973841408	0
1	ChIJk0zF39hx5kcRBn8cQxes_3M	9	2	2.3372432	48.854127966898034	3	2.337243126070031	48.854128168307206	0
1	ChIJk0zF39hx5kcRBn8cQxes_3M	9	2	2.3372432	48.854127966898034	3	2.3372932286589276	48.85412389621603	0
1	ChIJk0zF39hx5kcRBn8cQxes_3M	9	2	2.3372432	48.854127966898034	3	2.3373966822520487	48.85425755987127	0
1	ChIJk0zF39hx5kcRBn8cQxes_3M	9	2	2.3372432	48.854127966898034	3	2.337204846525601	48.854115489856085	0
1	ChIJk0zF39hx5kcRBn8cQxes_3M	9	2	2.3372432	48.854127966898034	3	2.3372601884434223	48.85406428247343	17
1	ChIJk0zF39hx5kcRBn8cQxes_3M	9	2	2.3372432	48.854127966898034	3	2.3372007521943536	48.85412698876172	0
1	ChIJk0zF39hx5kcRBn8cQxes_3M	9	2	2.3372432	48.854127966898034	3	2.337160842390219	48.854134653267046	0
1	ChIJk0zF39hx5kcRBn8cQxes_3M	9	2	2.3372432	48.854127966898034	3	2.337267414177318	48.854070295226094	14
1	ChIJk0zF39hx5kcRBn8cQxes_3M	9	3	2.3375848022693386	48.85412796639347	0	2.3375848022693386	48.85412796639347	0
1	ChIJk0zF39hx5kcRBn8cQxes_3M	9	3	2.3375848022693386	48.85412796639347	0	2.3375848022693386	48.85412796639347	0
1	ChIJk0zF39hx5kcRBn8cQxes_3M	9	3	2.3375848022693386	48.85412796639347	0	2.3375848022693386	48.85412796639347	0
1	ChIJk0zF39hx5kcRBn8cQxes_3M	9	3	2.3375848022693386	48.85412796639347	0	2.3375848022693386	48.85412796639347	0
1	ChIJk0zF39hx5kcRBn8cQxes_3M	9	3	2.3375848022693386	48.85412796639347	0	2.3375848022693386	48.85412796639347	0
1	ChIJk0zF39hx5kcRBn8cQxes_3M	9	3	2.3375848022693386	48.85412796639347	0	2.3375848022693386	48.85412796639347	0
1	ChIJk0zF39hx5kcRBn8cQxes_3M	9	3	2.3375848022693386	48.85412796639347	0	2.3375848022693386	48.85412796639347	0
1	ChIJk0zF39hx5kcRBn8cQxes_3M	9	3	2.3375848022693386	48.85412796639347	0	2.3375848022693386	48.85412796639347	0
1	ChIJk0zF39hx5kcRBn8cQxes_3M	9	3	2.3375848022693386	48.85412796639347	0	2.3375848022693386	48.85412796639347	0
1	ChIJk0zF39hx5kcRBn8cQxes_3M	9	3	2.3375848022693386	48.85412796639347	0	2.3375848022693386	48.85412796639347	0
1	ChIJk0zF39hx5kcRBn8cQxes_3M	9	3	2.3375848022693386	48.85412796639347	1	2.3375732194411474	48.854132130688825	0
1	ChIJk0zF39hx5kcRBn8cQxes_3M	9	3	2.3375848022693386	48.85412796639347	1	2.337592290096372	48.854123188894924	0
1	ChIJk0zF39hx5kcRBn8cQxes_3M	9	3	2.3375848022693386	48.85412796639347	1	2.337574679273882	48.8541347209016	0
1	ChIJk0zF39hx5kcRBn8cQxes_3M	9	3	2.3375848022693386	48.85412796639347	1	2.3375873309509685	48.85411089850932	0
1	ChIJk0zF39hx5kcRBn8cQxes_3M	9	3	2.3375848022693386	48.85412796639347	1	2.337627596283402	48.854111399935	0
1	ChIJk0zF39hx5kcRBn8cQxes_3M	9	3	2.3375848022693386	48.85412796639347	1	2.337612297652222	48.85414476614059	0
1	ChIJk0zF39hx5kcRBn8cQxes_3M	9	3	2.3375848022693386	48.85412796639347	1	2.3375840095048197	48.854123449807595	0
1	ChIJk0zF39hx5kcRBn8cQxes_3M	9	3	2.3375848022693386	48.85412796639347	1	2.3375346632752545	48.85411025840914	0
1	ChIJk0zF39hx5kcRBn8cQxes_3M	9	3	2.3375848022693386	48.85412796639347	1	2.337580989966054	48.85413047532864	0
1	ChIJk0zF39hx5kcRBn8cQxes_3M	9	3	2.3375848022693386	48.85412796639347	1	2.3375550421796616	48.85412666170588	0
1	ChIJk0zF39hx5kcRBn8cQxes_3M	9	3	2.3375848022693386	48.85412796639347	2	2.3379565599649386	48.85355098653238	0
1	ChIJk0zF39hx5kcRBn8cQxes_3M	9	3	2.3375848022693386	48.85412796639347	2	2.3380003755406182	48.85412218623587	0
1	ChIJk0zF39hx5kcRBn8cQxes_3M	9	3	2.3375848022693386	48.85412796639347	2	2.3370452703222915	48.85381756871817	16
1	ChIJk0zF39hx5kcRBn8cQxes_3M	9	3	2.3375848022693386	48.85412796639347	2	2.3375677624125806	48.85421023822393	0
1	ChIJk0zF39hx5kcRBn8cQxes_3M	9	3	2.3375848022693386	48.85412796639347	2	2.3369419654156567	48.854048911211414	0
1	ChIJk0zF39hx5kcRBn8cQxes_3M	9	3	2.3375848022693386	48.85412796639347	2	2.3375879312012082	48.8541175670727	0
1	ChIJk0zF39hx5kcRBn8cQxes_3M	9	3	2.3375848022693386	48.85412796639347	2	2.3373819088565773	48.853941878845326	16
1	ChIJk0zF39hx5kcRBn8cQxes_3M	9	3	2.3375848022693386	48.85412796639347	2	2.3375066847255654	48.85413558684497	0
1	ChIJk0zF39hx5kcRBn8cQxes_3M	9	3	2.3375848022693386	48.85412796639347	2	2.3372712906628887	48.85409581048692	0
1	ChIJk0zF39hx5kcRBn8cQxes_3M	9	3	2.3375848022693386	48.85412796639347	2	2.3380119548641236	48.85397771137447	0
1	ChIJk0zF39hx5kcRBn8cQxes_3M	9	3	2.3375848022693386	48.85412796639347	3	2.3376917332201637	48.854149250882344	0
1	ChIJk0zF39hx5kcRBn8cQxes_3M	9	3	2.3375848022693386	48.85412796639347	3	2.3376044185209275	48.854139552767876	0
1	ChIJk0zF39hx5kcRBn8cQxes_3M	9	3	2.3375848022693386	48.85412796639347	3	2.3375474397558618	48.85416208759387	0
1	ChIJk0zF39hx5kcRBn8cQxes_3M	9	3	2.3375848022693386	48.85412796639347	3	2.3373909659436474	48.85416419632123	0
1	ChIJk0zF39hx5kcRBn8cQxes_3M	9	3	2.3375848022693386	48.85412796639347	3	2.3375374368994546	48.854159217708194	0
1	ChIJk0zF39hx5kcRBn8cQxes_3M	9	3	2.3375848022693386	48.85412796639347	3	2.337587358996623	48.854131071036925	0
1	ChIJk0zF39hx5kcRBn8cQxes_3M	9	3	2.3375848022693386	48.85412796639347	3	2.3375392153386603	48.854109712509825	0
1	ChIJk0zF39hx5kcRBn8cQxes_3M	9	3	2.3375848022693386	48.85412796639347	3	2.337457258988698	48.85396813223874	0
1	ChIJk0zF39hx5kcRBn8cQxes_3M	9	3	2.3375848022693386	48.85412796639347	3	2.337682478033538	48.8542202154563	0
1	ChIJk0zF39hx5kcRBn8cQxes_3M	9	3	2.3375848022693386	48.85412796639347	3	2.3375713917013816	48.85403404294797	0
1	ChIJk0zF39hx5kcRBn8cQxes_3M	9	4	2.336901599264333	48.85390319949544	0	2.336901599264333	48.85390319949544	0
1	ChIJk0zF39hx5kcRBn8cQxes_3M	9	4	2.336901599264333	48.85390319949544	0	2.336901599264333	48.85390319949544	0
1	ChIJk0zF39hx5kcRBn8cQxes_3M	9	4	2.336901599264333	48.85390319949544	0	2.336901599264333	48.85390319949544	0
1	ChIJk0zF39hx5kcRBn8cQxes_3M	9	4	2.336901599264333	48.85390319949544	0	2.336901599264333	48.85390319949544	0
1	ChIJk0zF39hx5kcRBn8cQxes_3M	9	4	2.336901599264333	48.85390319949544	0	2.336901599264333	48.85390319949544	0
1	ChIJk0zF39hx5kcRBn8cQxes_3M	9	4	2.336901599264333	48.85390319949544	0	2.336901599264333	48.85390319949544	0
1	ChIJk0zF39hx5kcRBn8cQxes_3M	9	4	2.336901599264333	48.85390319949544	0	2.336901599264333	48.85390319949544	0
1	ChIJk0zF39hx5kcRBn8cQxes_3M	9	4	2.336901599264333	48.85390319949544	0	2.336901599264333	48.85390319949544	0
1	ChIJk0zF39hx5kcRBn8cQxes_3M	9	4	2.336901599264333	48.85390319949544	0	2.336901599264333	48.85390319949544	0
1	ChIJk0zF39hx5kcRBn8cQxes_3M	9	4	2.336901599264333	48.85390319949544	0	2.336901599264333	48.85390319949544	0
1	ChIJk0zF39hx5kcRBn8cQxes_3M	9	4	2.336901599264333	48.85390319949544	1	2.3368850203822324	48.85388481116165	0
1	ChIJk0zF39hx5kcRBn8cQxes_3M	9	4	2.336901599264333	48.85390319949544	1	2.336908430609197	48.8539025134157	0
1	ChIJk0zF39hx5kcRBn8cQxes_3M	9	4	2.336901599264333	48.85390319949544	1	2.336890767981895	48.85389758328285	0
1	ChIJk0zF39hx5kcRBn8cQxes_3M	9	4	2.336901599264333	48.85390319949544	1	2.336884830499981	48.85390247456967	0
1	ChIJk0zF39hx5kcRBn8cQxes_3M	9	4	2.336901599264333	48.85390319949544	1	2.336896485480602	48.85389363583186	0
1	ChIJk0zF39hx5kcRBn8cQxes_3M	9	4	2.336901599264333	48.85390319949544	1	2.336884589927304	48.853886565959456	0
1	ChIJk0zF39hx5kcRBn8cQxes_3M	9	4	2.336901599264333	48.85390319949544	1	2.336899369834133	48.853901652649036	0
1	ChIJk0zF39hx5kcRBn8cQxes_3M	9	4	2.336901599264333	48.85390319949544	1	2.336864980236806	48.85391480662901	0
1	ChIJk0zF39hx5kcRBn8cQxes_3M	9	4	2.336901599264333	48.85390319949544	1	2.336916720196632	48.85390747304345	0
1	ChIJk0zF39hx5kcRBn8cQxes_3M	9	4	2.336901599264333	48.85390319949544	1	2.336879023779056	48.85388837855341	0
1	ChIJk0zF39hx5kcRBn8cQxes_3M	9	4	2.336901599264333	48.85390319949544	2	2.336951746339792	48.853870848807404	0
1	ChIJk0zF39hx5kcRBn8cQxes_3M	9	4	2.336901599264333	48.85390319949544	2	2.33689781224611	48.85390721466793	0
1	ChIJk0zF39hx5kcRBn8cQxes_3M	9	4	2.336901599264333	48.85390319949544	2	2.336660799929873	48.85387436870263	0
1	ChIJk0zF39hx5kcRBn8cQxes_3M	9	4	2.336901599264333	48.85390319949544	2	2.3369171074238966	48.85390692886854	0
1	ChIJk0zF39hx5kcRBn8cQxes_3M	9	4	2.336901599264333	48.85390319949544	2	2.3369081315067275	48.85380404163916	0
1	ChIJk0zF39hx5kcRBn8cQxes_3M	9	4	2.336901599264333	48.85390319949544	2	2.3367874741077532	48.853611257781616	0
1	ChIJk0zF39hx5kcRBn8cQxes_3M	9	4	2.336901599264333	48.85390319949544	2	2.3368462387797666	48.853864238599655	0
1	ChIJk0zF39hx5kcRBn8cQxes_3M	9	4	2.336901599264333	48.85390319949544	2	2.336814925655361	48.85381919362168	0
1	ChIJk0zF39hx5kcRBn8cQxes_3M	9	4	2.336901599264333	48.85390319949544	2	2.336932177465579	48.85377985005252	0
1	ChIJk0zF39hx5kcRBn8cQxes_3M	9	4	2.336901599264333	48.85390319949544	2	2.336831685078341	48.85414569866317	0
1	ChIJk0zF39hx5kcRBn8cQxes_3M	9	4	2.336901599264333	48.85390319949544	3	2.336915683161411	48.853906020912305	0
1	ChIJk0zF39hx5kcRBn8cQxes_3M	9	4	2.336901599264333	48.85390319949544	3	2.3369111973124306	48.85390137802032	0
1	ChIJk0zF39hx5kcRBn8cQxes_3M	9	4	2.336901599264333	48.85390319949544	3	2.336933018271377	48.854042489461484	0
1	ChIJk0zF39hx5kcRBn8cQxes_3M	9	4	2.336901599264333	48.85390319949544	3	2.3369412101699814	48.85388605757062	0
1	ChIJk0zF39hx5kcRBn8cQxes_3M	9	4	2.336901599264333	48.85390319949544	3	2.3369065362126418	48.85386061127116	0
1	ChIJk0zF39hx5kcRBn8cQxes_3M	9	4	2.336901599264333	48.85390319949544	3	2.336899486830679	48.85390362353714	0
1	ChIJk0zF39hx5kcRBn8cQxes_3M	9	4	2.336901599264333	48.85390319949544	3	2.33704161326101	48.85403332087537	0
1	ChIJk0zF39hx5kcRBn8cQxes_3M	9	4	2.336901599264333	48.85390319949544	3	2.3368885550375986	48.85390964878491	0
1	ChIJk0zF39hx5kcRBn8cQxes_3M	9	4	2.336901599264333	48.85390319949544	3	2.3369960054498553	48.85391515093523	20
1	ChIJk0zF39hx5kcRBn8cQxes_3M	9	4	2.336901599264333	48.85390319949544	3	2.3369692258650643	48.85388295565931	0
1	ChIJk0zF39hx5kcRBn8cQxes_3M	9	5	2.3372432	48.8539032	0	2.3372432	48.8539032	1
1	ChIJk0zF39hx5kcRBn8cQxes_3M	9	5	2.3372432	48.8539032	0	2.3372432	48.8539032	1
1	ChIJk0zF39hx5kcRBn8cQxes_3M	9	5	2.3372432	48.8539032	0	2.3372432	48.8539032	1
1	ChIJk0zF39hx5kcRBn8cQxes_3M	9	5	2.3372432	48.8539032	0	2.3372432	48.8539032	1
1	ChIJk0zF39hx5kcRBn8cQxes_3M	9	5	2.3372432	48.8539032	0	2.3372432	48.8539032	1
1	ChIJk0zF39hx5kcRBn8cQxes_3M	9	5	2.3372432	48.8539032	0	2.3372432	48.8539032	1
1	ChIJk0zF39hx5kcRBn8cQxes_3M	9	5	2.3372432	48.8539032	0	2.3372432	48.8539032	1
1	ChIJk0zF39hx5kcRBn8cQxes_3M	9	5	2.3372432	48.8539032	0	2.3372432	48.8539032	1
1	ChIJk0zF39hx5kcRBn8cQxes_3M	9	5	2.3372432	48.8539032	0	2.3372432	48.8539032	1
1	ChIJk0zF39hx5kcRBn8cQxes_3M	9	5	2.3372432	48.8539032	0	2.3372432	48.8539032	1
1	ChIJk0zF39hx5kcRBn8cQxes_3M	9	5	2.3372432	48.8539032	1	2.337242891555479	48.853903556659816	1
1	ChIJk0zF39hx5kcRBn8cQxes_3M	9	5	2.3372432	48.8539032	1	2.337217417893078	48.85390603543079	1
1	ChIJk0zF39hx5kcRBn8cQxes_3M	9	5	2.3372432	48.8539032	1	2.33724184703133	48.85390356563874	1
1	ChIJk0zF39hx5kcRBn8cQxes_3M	9	5	2.3372432	48.8539032	1	2.337264587058618	48.85390993605242	1
1	ChIJk0zF39hx5kcRBn8cQxes_3M	9	5	2.3372432	48.8539032	1	2.337205370793056	48.853892154624525	1
1	ChIJk0zF39hx5kcRBn8cQxes_3M	9	5	2.3372432	48.8539032	1	2.33724945793383	48.853900207471916	1
1	ChIJk0zF39hx5kcRBn8cQxes_3M	9	5	2.3372432	48.8539032	1	2.337253992529488	48.85390229826757	1
1	ChIJk0zF39hx5kcRBn8cQxes_3M	9	5	2.3372432	48.8539032	1	2.3372296094853393	48.85390011247238	1
1	ChIJk0zF39hx5kcRBn8cQxes_3M	9	5	2.3372432	48.8539032	1	2.3372380747937074	48.85388032619648	1
1	ChIJk0zF39hx5kcRBn8cQxes_3M	9	5	2.3372432	48.8539032	1	2.3372428360360544	48.85390361661596	1
1	ChIJk0zF39hx5kcRBn8cQxes_3M	9	5	2.3372432	48.8539032	2	2.3373854763210775	48.85408588458674	17
1	ChIJk0zF39hx5kcRBn8cQxes_3M	9	5	2.3372432	48.8539032	2	2.3372340410904635	48.85390324622527	1
1	ChIJk0zF39hx5kcRBn8cQxes_3M	9	5	2.3372432	48.8539032	2	2.337207831337527	48.85380904277957	1
1	ChIJk0zF39hx5kcRBn8cQxes_3M	9	5	2.3372432	48.8539032	2	2.3372505919226305	48.85396800040822	5
1	ChIJk0zF39hx5kcRBn8cQxes_3M	9	5	2.3372432	48.8539032	2	2.3372612736826768	48.85391462108061	1
1	ChIJk0zF39hx5kcRBn8cQxes_3M	9	5	2.3372432	48.8539032	2	2.3371439653098034	48.85379690697946	9
1	ChIJk0zF39hx5kcRBn8cQxes_3M	9	5	2.3372432	48.8539032	2	2.3369729177572047	48.85414095807984	0
1	ChIJk0zF39hx5kcRBn8cQxes_3M	9	5	2.3372432	48.8539032	2	2.3371195883706055	48.853787831542455	9
1	ChIJk0zF39hx5kcRBn8cQxes_3M	9	5	2.3372432	48.8539032	2	2.3362521430235788	48.85413555907656	0
1	ChIJk0zF39hx5kcRBn8cQxes_3M	9	5	2.3372432	48.8539032	2	2.33722732766624	48.8536813186522	0
1	ChIJk0zF39hx5kcRBn8cQxes_3M	9	5	2.3372432	48.8539032	3	2.3372342602910856	48.853837651041616	1
1	ChIJk0zF39hx5kcRBn8cQxes_3M	9	5	2.3372432	48.8539032	3	2.3372761268628848	48.85387468420543	1
1	ChIJk0zF39hx5kcRBn8cQxes_3M	9	5	2.3372432	48.8539032	3	2.337332243610117	48.85388721187143	4
1	ChIJk0zF39hx5kcRBn8cQxes_3M	9	5	2.3372432	48.8539032	3	2.337246490946651	48.85390237538495	1
1	ChIJk0zF39hx5kcRBn8cQxes_3M	9	5	2.3372432	48.8539032	3	2.3372373911959614	48.85387278544896	1
1	ChIJk0zF39hx5kcRBn8cQxes_3M	9	5	2.3372432	48.8539032	3	2.337190843218583	48.8539021108505	5
1	ChIJk0zF39hx5kcRBn8cQxes_3M	9	5	2.3372432	48.8539032	3	2.337242158868987	48.85390220075118	1
1	ChIJk0zF39hx5kcRBn8cQxes_3M	9	5	2.3372432	48.8539032	3	2.3372413205846394	48.85389911214394	1
1	ChIJk0zF39hx5kcRBn8cQxes_3M	9	5	2.3372432	48.8539032	3	2.3371544496231413	48.8539632868164	9
1	ChIJk0zF39hx5kcRBn8cQxes_3M	9	5	2.3372432	48.8539032	3	2.3372274759368015	48.85392366111749	1
1	ChIJk0zF39hx5kcRBn8cQxes_3M	9	6	2.3375848007356677	48.85390319949544	0	2.3375848007356677	48.85390319949544	0
1	ChIJk0zF39hx5kcRBn8cQxes_3M	9	6	2.3375848007356677	48.85390319949544	0	2.3375848007356677	48.85390319949544	0
1	ChIJk0zF39hx5kcRBn8cQxes_3M	9	6	2.3375848007356677	48.85390319949544	0	2.3375848007356677	48.85390319949544	0
1	ChIJk0zF39hx5kcRBn8cQxes_3M	9	6	2.3375848007356677	48.85390319949544	0	2.3375848007356677	48.85390319949544	0
1	ChIJk0zF39hx5kcRBn8cQxes_3M	9	6	2.3375848007356677	48.85390319949544	0	2.3375848007356677	48.85390319949544	0
1	ChIJk0zF39hx5kcRBn8cQxes_3M	9	6	2.3375848007356677	48.85390319949544	0	2.3375848007356677	48.85390319949544	0
1	ChIJk0zF39hx5kcRBn8cQxes_3M	9	6	2.3375848007356677	48.85390319949544	0	2.3375848007356677	48.85390319949544	0
1	ChIJk0zF39hx5kcRBn8cQxes_3M	9	6	2.3375848007356677	48.85390319949544	0	2.3375848007356677	48.85390319949544	0
1	ChIJk0zF39hx5kcRBn8cQxes_3M	9	6	2.3375848007356677	48.85390319949544	0	2.3375848007356677	48.85390319949544	0
1	ChIJk0zF39hx5kcRBn8cQxes_3M	9	6	2.3375848007356677	48.85390319949544	0	2.3375848007356677	48.85390319949544	0
1	ChIJk0zF39hx5kcRBn8cQxes_3M	9	6	2.3375848007356677	48.85390319949544	1	2.3376126367598427	48.85390458979062	0
1	ChIJk0zF39hx5kcRBn8cQxes_3M	9	6	2.3375848007356677	48.85390319949544	1	2.3375818268082633	48.853887905259654	0
1	ChIJk0zF39hx5kcRBn8cQxes_3M	9	6	2.3375848007356677	48.85390319949544	1	2.3375860724139415	48.853911361196644	0
1	ChIJk0zF39hx5kcRBn8cQxes_3M	9	6	2.3375848007356677	48.85390319949544	1	2.33757884672562	48.85390386431394	0
1	ChIJk0zF39hx5kcRBn8cQxes_3M	9	6	2.3375848007356677	48.85390319949544	1	2.3375983542477097	48.85390614675071	0
1	ChIJk0zF39hx5kcRBn8cQxes_3M	9	6	2.3375848007356677	48.85390319949544	1	2.337578332070627	48.8539099139282	0
1	ChIJk0zF39hx5kcRBn8cQxes_3M	9	6	2.3375848007356677	48.85390319949544	1	2.3376023947579445	48.85390727863986	0
1	ChIJk0zF39hx5kcRBn8cQxes_3M	9	6	2.3375848007356677	48.85390319949544	1	2.337584819463149	48.853901048072174	0
1	ChIJk0zF39hx5kcRBn8cQxes_3M	9	6	2.3375848007356677	48.85390319949544	1	2.337584465923456	48.853902348097456	0
1	ChIJk0zF39hx5kcRBn8cQxes_3M	9	6	2.3375848007356677	48.85390319949544	1	2.3375919105096052	48.85391118079504	0
1	ChIJk0zF39hx5kcRBn8cQxes_3M	9	6	2.3375848007356677	48.85390319949544	2	2.338244816763913	48.85415871414992	0
1	ChIJk0zF39hx5kcRBn8cQxes_3M	9	6	2.3375848007356677	48.85390319949544	2	2.337659791792423	48.85390110106469	0
1	ChIJk0zF39hx5kcRBn8cQxes_3M	9	6	2.3375848007356677	48.85390319949544	2	2.3375882428978687	48.85390260547874	0
1	ChIJk0zF39hx5kcRBn8cQxes_3M	9	6	2.3375848007356677	48.85390319949544	2	2.3374895783020992	48.85390134948107	0
1	ChIJk0zF39hx5kcRBn8cQxes_3M	9	6	2.3375848007356677	48.85390319949544	2	2.33763325116967	48.854273875654336	0
1	ChIJk0zF39hx5kcRBn8cQxes_3M	9	6	2.3375848007356677	48.85390319949544	2	2.3376648319845934	48.853940331046424	0
1	ChIJk0zF39hx5kcRBn8cQxes_3M	9	6	2.3375848007356677	48.85390319949544	2	2.337530130889206	48.8540593947081	0
1	ChIJk0zF39hx5kcRBn8cQxes_3M	9	6	2.3375848007356677	48.85390319949544	2	2.338083263566887	48.853466391733114	0
1	ChIJk0zF39hx5kcRBn8cQxes_3M	9	6	2.3375848007356677	48.85390319949544	2	2.337443984271256	48.85400976157173	20
1	ChIJk0zF39hx5kcRBn8cQxes_3M	9	6	2.3375848007356677	48.85390319949544	2	2.337616318057859	48.854023775521114	0
1	ChIJk0zF39hx5kcRBn8cQxes_3M	9	6	2.3375848007356677	48.85390319949544	3	2.3375005311344705	48.85386274816589	0
1	ChIJk0zF39hx5kcRBn8cQxes_3M	9	6	2.3375848007356677	48.85390319949544	3	2.3374990844228876	48.85397044615911	0
1	ChIJk0zF39hx5kcRBn8cQxes_3M	9	6	2.3375848007356677	48.85390319949544	3	2.337727077468121	48.854016556149176	0
1	ChIJk0zF39hx5kcRBn8cQxes_3M	9	6	2.3375848007356677	48.85390319949544	3	2.3375696248359357	48.853887155613144	0
1	ChIJk0zF39hx5kcRBn8cQxes_3M	9	6	2.3375848007356677	48.85390319949544	3	2.3374859838324054	48.853854623011394	0
1	ChIJk0zF39hx5kcRBn8cQxes_3M	9	6	2.3375848007356677	48.85390319949544	3	2.33774379316368	48.853871381095786	0
1	ChIJk0zF39hx5kcRBn8cQxes_3M	9	6	2.3375848007356677	48.85390319949544	3	2.3374626501251163	48.85382918647341	0
1	ChIJk0zF39hx5kcRBn8cQxes_3M	9	6	2.3375848007356677	48.85390319949544	3	2.3375448108952814	48.85383675063225	0
1	ChIJk0zF39hx5kcRBn8cQxes_3M	9	6	2.3375848007356677	48.85390319949544	3	2.337613201490983	48.85390426989523	0
1	ChIJk0zF39hx5kcRBn8cQxes_3M	9	6	2.3375848007356677	48.85390319949544	3	2.3376236733536238	48.85390229425527	0
1	ChIJk0zF39hx5kcRBn8cQxes_3M	9	7	2.3369016007979866	48.8536784325974	0	2.3369016007979866	48.8536784325974	0
1	ChIJk0zF39hx5kcRBn8cQxes_3M	9	7	2.3369016007979866	48.8536784325974	0	2.3369016007979866	48.8536784325974	0
1	ChIJk0zF39hx5kcRBn8cQxes_3M	9	7	2.3369016007979866	48.8536784325974	0	2.3369016007979866	48.8536784325974	0
1	ChIJk0zF39hx5kcRBn8cQxes_3M	9	7	2.3369016007979866	48.8536784325974	0	2.3369016007979866	48.8536784325974	0
1	ChIJk0zF39hx5kcRBn8cQxes_3M	9	7	2.3369016007979866	48.8536784325974	0	2.3369016007979866	48.8536784325974	0
1	ChIJk0zF39hx5kcRBn8cQxes_3M	9	7	2.3369016007979866	48.8536784325974	0	2.3369016007979866	48.8536784325974	0
1	ChIJk0zF39hx5kcRBn8cQxes_3M	9	7	2.3369016007979866	48.8536784325974	0	2.3369016007979866	48.8536784325974	0
1	ChIJk0zF39hx5kcRBn8cQxes_3M	9	7	2.3369016007979866	48.8536784325974	0	2.3369016007979866	48.8536784325974	0
1	ChIJk0zF39hx5kcRBn8cQxes_3M	9	7	2.3369016007979866	48.8536784325974	0	2.3369016007979866	48.8536784325974	0
1	ChIJk0zF39hx5kcRBn8cQxes_3M	9	7	2.3369016007979866	48.8536784325974	0	2.3369016007979866	48.8536784325974	0
1	ChIJk0zF39hx5kcRBn8cQxes_3M	9	7	2.3369016007979866	48.8536784325974	1	2.336901467362018	48.853659563900585	0
1	ChIJk0zF39hx5kcRBn8cQxes_3M	9	7	2.3369016007979866	48.8536784325974	1	2.3369156878007034	48.85367108470657	0
1	ChIJk0zF39hx5kcRBn8cQxes_3M	9	7	2.3369016007979866	48.8536784325974	1	2.3369015653164	48.85367843549549	0
1	ChIJk0zF39hx5kcRBn8cQxes_3M	9	7	2.3369016007979866	48.8536784325974	1	2.3369032283779907	48.85368025435334	0
1	ChIJk0zF39hx5kcRBn8cQxes_3M	9	7	2.3369016007979866	48.8536784325974	1	2.3368972174672287	48.853655129009944	0
1	ChIJk0zF39hx5kcRBn8cQxes_3M	9	7	2.3369016007979866	48.8536784325974	1	2.3369104594204355	48.853670046486144	0
1	ChIJk0zF39hx5kcRBn8cQxes_3M	9	7	2.3369016007979866	48.8536784325974	1	2.3369203403231222	48.85367661294732	0
1	ChIJk0zF39hx5kcRBn8cQxes_3M	9	7	2.3369016007979866	48.8536784325974	1	2.3368872517288297	48.85366588410811	0
1	ChIJk0zF39hx5kcRBn8cQxes_3M	9	7	2.3369016007979866	48.8536784325974	1	2.3369090341145347	48.8536714161094	0
1	ChIJk0zF39hx5kcRBn8cQxes_3M	9	7	2.3369016007979866	48.8536784325974	1	2.336916531598275	48.85365984114852	0
1	ChIJk0zF39hx5kcRBn8cQxes_3M	9	7	2.3369016007979866	48.8536784325974	2	2.3368829095836965	48.85361937443171	0
1	ChIJk0zF39hx5kcRBn8cQxes_3M	9	7	2.3369016007979866	48.8536784325974	2	2.3368446708810127	48.85355472985302	0
1	ChIJk0zF39hx5kcRBn8cQxes_3M	9	7	2.3369016007979866	48.8536784325974	2	2.336910240097956	48.85371538207916	0
1	ChIJk0zF39hx5kcRBn8cQxes_3M	9	7	2.3369016007979866	48.8536784325974	2	2.3372053212727777	48.85380870171564	1
1	ChIJk0zF39hx5kcRBn8cQxes_3M	9	7	2.3369016007979866	48.8536784325974	2	2.336996392202211	48.85373995021765	0
1	ChIJk0zF39hx5kcRBn8cQxes_3M	9	7	2.3369016007979866	48.8536784325974	2	2.337191880482637	48.8537533812085	8
1	ChIJk0zF39hx5kcRBn8cQxes_3M	9	7	2.3369016007979866	48.8536784325974	2	2.3369458099781677	48.85338727489409	0
1	ChIJk0zF39hx5kcRBn8cQxes_3M	9	7	2.3369016007979866	48.8536784325974	2	2.3364225409882327	48.85349302638243	0
1	ChIJk0zF39hx5kcRBn8cQxes_3M	9	7	2.3369016007979866	48.8536784325974	2	2.3370341022226304	48.85368718029132	0
1	ChIJk0zF39hx5kcRBn8cQxes_3M	9	7	2.3369016007979866	48.8536784325974	2	2.3368353243488467	48.85359079857196	0
1	ChIJk0zF39hx5kcRBn8cQxes_3M	9	7	2.3369016007979866	48.8536784325974	3	2.3368631387108714	48.85364705409215	0
1	ChIJk0zF39hx5kcRBn8cQxes_3M	9	7	2.3369016007979866	48.8536784325974	3	2.3370228781796394	48.85361927256665	0
1	ChIJk0zF39hx5kcRBn8cQxes_3M	9	7	2.3369016007979866	48.8536784325974	3	2.336880361451829	48.85378094982496	0
1	ChIJk0zF39hx5kcRBn8cQxes_3M	9	7	2.3369016007979866	48.8536784325974	3	2.336871179862335	48.85370520123891	0
1	ChIJk0zF39hx5kcRBn8cQxes_3M	9	7	2.3369016007979866	48.8536784325974	3	2.3369373587289366	48.85372728674009	0
1	ChIJk0zF39hx5kcRBn8cQxes_3M	9	7	2.3369016007979866	48.8536784325974	3	2.3369013810889263	48.85367841025499	0
1	ChIJk0zF39hx5kcRBn8cQxes_3M	9	7	2.3369016007979866	48.8536784325974	3	2.3366983632591802	48.85365713857215	0
1	ChIJk0zF39hx5kcRBn8cQxes_3M	9	7	2.3369016007979866	48.8536784325974	3	2.336866597867247	48.85355766575666	0
1	ChIJk0zF39hx5kcRBn8cQxes_3M	9	7	2.3369016007979866	48.8536784325974	3	2.3370059838112853	48.853662275327714	0
1	ChIJk0zF39hx5kcRBn8cQxes_3M	9	7	2.3369016007979866	48.8536784325974	3	2.336866233372016	48.85362076982044	0
1	ChIJk0zF39hx5kcRBn8cQxes_3M	9	8	2.3372432	48.85367843310196	0	2.3372432	48.85367843310196	0
1	ChIJk0zF39hx5kcRBn8cQxes_3M	9	8	2.3372432	48.85367843310196	0	2.3372432	48.85367843310196	0
1	ChIJk0zF39hx5kcRBn8cQxes_3M	9	8	2.3372432	48.85367843310196	0	2.3372432	48.85367843310196	0
1	ChIJk0zF39hx5kcRBn8cQxes_3M	9	8	2.3372432	48.85367843310196	0	2.3372432	48.85367843310196	0
1	ChIJk0zF39hx5kcRBn8cQxes_3M	9	8	2.3372432	48.85367843310196	0	2.3372432	48.85367843310196	0
1	ChIJk0zF39hx5kcRBn8cQxes_3M	9	8	2.3372432	48.85367843310196	0	2.3372432	48.85367843310196	0
1	ChIJk0zF39hx5kcRBn8cQxes_3M	9	8	2.3372432	48.85367843310196	0	2.3372432	48.85367843310196	0
1	ChIJk0zF39hx5kcRBn8cQxes_3M	9	8	2.3372432	48.85367843310196	0	2.3372432	48.85367843310196	0
1	ChIJk0zF39hx5kcRBn8cQxes_3M	9	8	2.3372432	48.85367843310196	0	2.3372432	48.85367843310196	0
1	ChIJk0zF39hx5kcRBn8cQxes_3M	9	8	2.3372432	48.85367843310196	0	2.3372432	48.85367843310196	0
1	ChIJk0zF39hx5kcRBn8cQxes_3M	9	8	2.3372432	48.85367843310196	1	2.3372426614827746	48.853677147178516	0
1	ChIJk0zF39hx5kcRBn8cQxes_3M	9	8	2.3372432	48.85367843310196	1	2.337254198868812	48.853679397821516	0
1	ChIJk0zF39hx5kcRBn8cQxes_3M	9	8	2.3372432	48.85367843310196	1	2.3372213633995518	48.853691202004576	0
1	ChIJk0zF39hx5kcRBn8cQxes_3M	9	8	2.3372432	48.85367843310196	1	2.3372421288165524	48.853665630625315	0
1	ChIJk0zF39hx5kcRBn8cQxes_3M	9	8	2.3372432	48.85367843310196	1	2.3372376121604392	48.85367325178676	0
1	ChIJk0zF39hx5kcRBn8cQxes_3M	9	8	2.3372432	48.85367843310196	1	2.33723803706587	48.85369489754978	0
1	ChIJk0zF39hx5kcRBn8cQxes_3M	9	8	2.3372432	48.85367843310196	1	2.3372436398200236	48.853679177319776	0
1	ChIJk0zF39hx5kcRBn8cQxes_3M	9	8	2.3372432	48.85367843310196	1	2.337238862599608	48.85367503697393	0
1	ChIJk0zF39hx5kcRBn8cQxes_3M	9	8	2.3372432	48.85367843310196	1	2.3372365033397133	48.85367610164378	0
1	ChIJk0zF39hx5kcRBn8cQxes_3M	9	8	2.3372432	48.85367843310196	1	2.3372059676425483	48.85368146086391	0
1	ChIJk0zF39hx5kcRBn8cQxes_3M	9	8	2.3372432	48.85367843310196	2	2.337425322004735	48.85368156210862	0
1	ChIJk0zF39hx5kcRBn8cQxes_3M	9	8	2.3372432	48.85367843310196	2	2.3368538065757125	48.85329130504181	0
1	ChIJk0zF39hx5kcRBn8cQxes_3M	9	8	2.3372432	48.85367843310196	2	2.3374759242416974	48.85361579277071	0
1	ChIJk0zF39hx5kcRBn8cQxes_3M	9	8	2.3372432	48.85367843310196	2	2.3369962828528887	48.85384322323723	18
1	ChIJk0zF39hx5kcRBn8cQxes_3M	9	8	2.3372432	48.85367843310196	2	2.33719717766311	48.854029930449215	19
1	ChIJk0zF39hx5kcRBn8cQxes_3M	9	8	2.3372432	48.85367843310196	2	2.337094663097671	48.853670262817886	0
1	ChIJk0zF39hx5kcRBn8cQxes_3M	9	8	2.3372432	48.85367843310196	2	2.3373617076522475	48.85383355289257	7
1	ChIJk0zF39hx5kcRBn8cQxes_3M	9	8	2.3372432	48.85367843310196	2	2.337256733544202	48.853652107555654	0
1	ChIJk0zF39hx5kcRBn8cQxes_3M	9	8	2.3372432	48.85367843310196	2	2.33704083015708	48.85424950642274	0
1	ChIJk0zF39hx5kcRBn8cQxes_3M	9	8	2.3372432	48.85367843310196	2	2.33717876411918	48.853671645993714	0
1	ChIJk0zF39hx5kcRBn8cQxes_3M	9	8	2.3372432	48.85367843310196	3	2.3371272353443135	48.85372158683382	0
1	ChIJk0zF39hx5kcRBn8cQxes_3M	9	8	2.3372432	48.85367843310196	3	2.3373358015904073	48.85360621881661	0
1	ChIJk0zF39hx5kcRBn8cQxes_3M	9	8	2.3372432	48.85367843310196	3	2.3372192035878494	48.85365823245519	0
1	ChIJk0zF39hx5kcRBn8cQxes_3M	9	8	2.3372432	48.85367843310196	3	2.3374116218216434	48.853737797955816	0
1	ChIJk0zF39hx5kcRBn8cQxes_3M	9	8	2.3372432	48.85367843310196	3	2.337229962269094	48.853688740879996	0
1	ChIJk0zF39hx5kcRBn8cQxes_3M	9	8	2.3372432	48.85367843310196	3	2.3372429473209375	48.85370418283125	0
1	ChIJk0zF39hx5kcRBn8cQxes_3M	9	8	2.3372432	48.85367843310196	3	2.3372424414923167	48.85367838925003	0
1	ChIJk0zF39hx5kcRBn8cQxes_3M	9	8	2.3372432	48.85367843310196	3	2.3373280749011314	48.853669043229004	0
1	ChIJk0zF39hx5kcRBn8cQxes_3M	9	8	2.3372432	48.85367843310196	3	2.337245643477129	48.85367756999355	0
1	ChIJk0zF39hx5kcRBn8cQxes_3M	9	8	2.3372432	48.85367843310196	3	2.3373520134693697	48.85367774744391	0
1	ChIJk0zF39hx5kcRBn8cQxes_3M	9	9	2.337584799202014	48.8536784325974	0	2.337584799202014	48.8536784325974	0
1	ChIJk0zF39hx5kcRBn8cQxes_3M	9	9	2.337584799202014	48.8536784325974	0	2.337584799202014	48.8536784325974	0
1	ChIJk0zF39hx5kcRBn8cQxes_3M	9	9	2.337584799202014	48.8536784325974	0	2.337584799202014	48.8536784325974	0
1	ChIJk0zF39hx5kcRBn8cQxes_3M	9	9	2.337584799202014	48.8536784325974	0	2.337584799202014	48.8536784325974	0
1	ChIJk0zF39hx5kcRBn8cQxes_3M	9	9	2.337584799202014	48.8536784325974	0	2.337584799202014	48.8536784325974	0
1	ChIJk0zF39hx5kcRBn8cQxes_3M	9	9	2.337584799202014	48.8536784325974	0	2.337584799202014	48.8536784325974	0
1	ChIJk0zF39hx5kcRBn8cQxes_3M	9	9	2.337584799202014	48.8536784325974	0	2.337584799202014	48.8536784325974	0
1	ChIJk0zF39hx5kcRBn8cQxes_3M	9	9	2.337584799202014	48.8536784325974	0	2.337584799202014	48.8536784325974	0
1	ChIJk0zF39hx5kcRBn8cQxes_3M	9	9	2.337584799202014	48.8536784325974	0	2.337584799202014	48.8536784325974	0
1	ChIJk0zF39hx5kcRBn8cQxes_3M	9	9	2.337584799202014	48.8536784325974	0	2.337584799202014	48.8536784325974	0
1	ChIJk0zF39hx5kcRBn8cQxes_3M	9	9	2.337584799202014	48.8536784325974	1	2.33757518873851	48.853673704953124	0
1	ChIJk0zF39hx5kcRBn8cQxes_3M	9	9	2.337584799202014	48.8536784325974	1	2.33757332022743	48.853679935133094	0
1	ChIJk0zF39hx5kcRBn8cQxes_3M	9	9	2.337584799202014	48.8536784325974	1	2.3375811530452855	48.853703392212026	0
1	ChIJk0zF39hx5kcRBn8cQxes_3M	9	9	2.337584799202014	48.8536784325974	1	2.337586574061164	48.85369065986261	0
1	ChIJk0zF39hx5kcRBn8cQxes_3M	9	9	2.337584799202014	48.8536784325974	1	2.3375854324784653	48.853676646281016	0
1	ChIJk0zF39hx5kcRBn8cQxes_3M	9	9	2.337584799202014	48.8536784325974	1	2.337581182449769	48.8536781151817	0
1	ChIJk0zF39hx5kcRBn8cQxes_3M	9	9	2.337584799202014	48.8536784325974	1	2.337592625714671	48.85368186541866	0
1	ChIJk0zF39hx5kcRBn8cQxes_3M	9	9	2.337584799202014	48.8536784325974	1	2.3375861603397228	48.85367464168575	0
1	ChIJk0zF39hx5kcRBn8cQxes_3M	9	9	2.337584799202014	48.8536784325974	1	2.3375574065141214	48.85366849482063	0
1	ChIJk0zF39hx5kcRBn8cQxes_3M	9	9	2.337584799202014	48.8536784325974	1	2.337566678985259	48.853677118673936	0
1	ChIJk0zF39hx5kcRBn8cQxes_3M	9	9	2.337584799202014	48.8536784325974	2	2.337809225166606	48.85331431702367	0
1	ChIJk0zF39hx5kcRBn8cQxes_3M	9	9	2.337584799202014	48.8536784325974	2	2.3376040748706846	48.85364754813961	0
1	ChIJk0zF39hx5kcRBn8cQxes_3M	9	9	2.337584799202014	48.8536784325974	2	2.3378044524166635	48.85330301160504	0
1	ChIJk0zF39hx5kcRBn8cQxes_3M	9	9	2.337584799202014	48.8536784325974	2	2.337849332647655	48.85367046954272	0
1	ChIJk0zF39hx5kcRBn8cQxes_3M	9	9	2.337584799202014	48.8536784325974	2	2.337032895731808	48.85360736390929	0
1	ChIJk0zF39hx5kcRBn8cQxes_3M	9	9	2.337584799202014	48.8536784325974	2	2.337754214269474	48.85328449481001	0
1	ChIJk0zF39hx5kcRBn8cQxes_3M	9	9	2.337584799202014	48.8536784325974	2	2.337579082220752	48.85369152961242	0
1	ChIJk0zF39hx5kcRBn8cQxes_3M	9	9	2.337584799202014	48.8536784325974	2	2.337626060247796	48.853661331869624	0
1	ChIJk0zF39hx5kcRBn8cQxes_3M	9	9	2.337584799202014	48.8536784325974	2	2.3380827972096734	48.85374334715906	0
1	ChIJk0zF39hx5kcRBn8cQxes_3M	9	9	2.337584799202014	48.8536784325974	2	2.338911215872787	48.85389650032682	0
1	ChIJk0zF39hx5kcRBn8cQxes_3M	9	9	2.337584799202014	48.8536784325974	3	2.337656387206743	48.853680668178505	0
1	ChIJk0zF39hx5kcRBn8cQxes_3M	9	9	2.337584799202014	48.8536784325974	3	2.3375400112516567	48.85357273021963	0
1	ChIJk0zF39hx5kcRBn8cQxes_3M	9	9	2.337584799202014	48.8536784325974	3	2.3376026130727574	48.853695260716165	0
1	ChIJk0zF39hx5kcRBn8cQxes_3M	9	9	2.337584799202014	48.8536784325974	3	2.337581819492382	48.8537152102289	0
1	ChIJk0zF39hx5kcRBn8cQxes_3M	9	9	2.337584799202014	48.8536784325974	3	2.3375513611991576	48.8536335344252	0
1	ChIJk0zF39hx5kcRBn8cQxes_3M	9	9	2.337584799202014	48.8536784325974	3	2.3374650586032555	48.853711546977564	0
1	ChIJk0zF39hx5kcRBn8cQxes_3M	9	9	2.337584799202014	48.8536784325974	3	2.337604554975331	48.8536850590788	0
1	ChIJk0zF39hx5kcRBn8cQxes_3M	9	9	2.337584799202014	48.8536784325974	3	2.3376031472925543	48.85373757311441	0
1	ChIJk0zF39hx5kcRBn8cQxes_3M	9	9	2.337584799202014	48.8536784325974	3	2.3375853940913487	48.85361502302732	0
1	ChIJk0zF39hx5kcRBn8cQxes_3M	9	9	2.337584799202014	48.8536784325974	3	2.33770118519628	48.8537586765652	0
1	ChIJNQ--ucL-JA0R_f_E7DDrQzk	4	1	-8.42898164031457	41.5502711665073	0	-8.42898164031457	41.5502711665073	0
1	ChIJNQ--ucL-JA0R_f_E7DDrQzk	4	1	-8.42898164031457	41.5502711665073	0	-8.42898164031457	41.5502711665073	0
1	ChIJNQ--ucL-JA0R_f_E7DDrQzk	4	1	-8.42898164031457	41.5502711665073	0	-8.42898164031457	41.5502711665073	0
1	ChIJNQ--ucL-JA0R_f_E7DDrQzk	4	1	-8.42898164031457	41.5502711665073	0	-8.42898164031457	41.5502711665073	0
1	ChIJNQ--ucL-JA0R_f_E7DDrQzk	4	1	-8.42898164031457	41.5502711665073	0	-8.42898164031457	41.5502711665073	0
1	ChIJNQ--ucL-JA0R_f_E7DDrQzk	4	1	-8.42898164031457	41.5502711665073	0	-8.42898164031457	41.5502711665073	0
1	ChIJNQ--ucL-JA0R_f_E7DDrQzk	4	1	-8.42898164031457	41.5502711665073	0	-8.42898164031457	41.5502711665073	0
1	ChIJNQ--ucL-JA0R_f_E7DDrQzk	4	1	-8.42898164031457	41.5502711665073	0	-8.42898164031457	41.5502711665073	0
1	ChIJNQ--ucL-JA0R_f_E7DDrQzk	4	1	-8.42898164031457	41.5502711665073	0	-8.42898164031457	41.5502711665073	0
1	ChIJNQ--ucL-JA0R_f_E7DDrQzk	4	1	-8.42898164031457	41.5502711665073	0	-8.42898164031457	41.5502711665073	0
1	ChIJNQ--ucL-JA0R_f_E7DDrQzk	4	1	-8.42898164031457	41.5502711665073	1	-8.42898363938655	41.550272227613206	0
1	ChIJNQ--ucL-JA0R_f_E7DDrQzk	4	1	-8.42898164031457	41.5502711665073	1	-8.428984739064077	41.55027854526725	0
1	ChIJNQ--ucL-JA0R_f_E7DDrQzk	4	1	-8.42898164031457	41.5502711665073	1	-8.428986064765452	41.55026037899518	0
1	ChIJNQ--ucL-JA0R_f_E7DDrQzk	4	1	-8.42898164031457	41.5502711665073	1	-8.428972728562082	41.550272539992314	0
1	ChIJNQ--ucL-JA0R_f_E7DDrQzk	4	1	-8.42898164031457	41.5502711665073	1	-8.428953501998839	41.550272095662095	0
1	ChIJNQ--ucL-JA0R_f_E7DDrQzk	4	1	-8.42898164031457	41.5502711665073	1	-8.429003766540124	41.550271593040684	0
1	ChIJNQ--ucL-JA0R_f_E7DDrQzk	4	1	-8.42898164031457	41.5502711665073	1	-8.428975066033559	41.55028452443807	0
1	ChIJNQ--ucL-JA0R_f_E7DDrQzk	4	1	-8.42898164031457	41.5502711665073	1	-8.429017728236477	41.550264245124836	0
1	ChIJNQ--ucL-JA0R_f_E7DDrQzk	4	1	-8.42898164031457	41.5502711665073	1	-8.428991070081427	41.5502749225853	0
1	ChIJNQ--ucL-JA0R_f_E7DDrQzk	4	1	-8.42898164031457	41.5502711665073	1	-8.428967133586621	41.55026765692473	0
1	ChIJNQ--ucL-JA0R_f_E7DDrQzk	4	1	-8.42898164031457	41.5502711665073	2	-8.429208573060551	41.55046290564396	0
1	ChIJNQ--ucL-JA0R_f_E7DDrQzk	4	1	-8.42898164031457	41.5502711665073	2	-8.428686029830713	41.55064104957587	0
1	ChIJNQ--ucL-JA0R_f_E7DDrQzk	4	1	-8.42898164031457	41.5502711665073	2	-8.429489607840258	41.55066362073189	0
1	ChIJNQ--ucL-JA0R_f_E7DDrQzk	4	1	-8.42898164031457	41.5502711665073	2	-8.428877789904211	41.55031688581687	0
1	ChIJNQ--ucL-JA0R_f_E7DDrQzk	4	1	-8.42898164031457	41.5502711665073	2	-8.42953746479191	41.55011771085302	0
1	ChIJNQ--ucL-JA0R_f_E7DDrQzk	4	1	-8.42898164031457	41.5502711665073	2	-8.429228833899707	41.54993315424702	0
1	ChIJNQ--ucL-JA0R_f_E7DDrQzk	4	1	-8.42898164031457	41.5502711665073	2	-8.429120249424589	41.550603052610114	0
1	ChIJNQ--ucL-JA0R_f_E7DDrQzk	4	1	-8.42898164031457	41.5502711665073	2	-8.42947459159445	41.550067346513536	0
1	ChIJNQ--ucL-JA0R_f_E7DDrQzk	4	1	-8.42898164031457	41.5502711665073	2	-8.42922508575646	41.5507713774288	0
1	ChIJNQ--ucL-JA0R_f_E7DDrQzk	4	1	-8.42898164031457	41.5502711665073	2	-8.429258142544544	41.550511693002036	0
1	ChIJNQ--ucL-JA0R_f_E7DDrQzk	4	1	-8.42898164031457	41.5502711665073	3	-8.428900059244585	41.55024744121742	0
1	ChIJNQ--ucL-JA0R_f_E7DDrQzk	4	1	-8.42898164031457	41.5502711665073	3	-8.429136101144044	41.55022973348044	0
1	ChIJNQ--ucL-JA0R_f_E7DDrQzk	4	1	-8.42898164031457	41.5502711665073	3	-8.428937665476933	41.55026460286683	0
1	ChIJNQ--ucL-JA0R_f_E7DDrQzk	4	1	-8.42898164031457	41.5502711665073	3	-8.428975784914627	41.55026203970922	0
1	ChIJNQ--ucL-JA0R_f_E7DDrQzk	4	1	-8.42898164031457	41.5502711665073	3	-8.428918247450325	41.55025295643426	0
1	ChIJNQ--ucL-JA0R_f_E7DDrQzk	4	1	-8.42898164031457	41.5502711665073	3	-8.428951798036667	41.55024532297904	0
1	ChIJNQ--ucL-JA0R_f_E7DDrQzk	4	1	-8.42898164031457	41.5502711665073	3	-8.428933241575391	41.55032756766403	0
1	ChIJNQ--ucL-JA0R_f_E7DDrQzk	4	1	-8.42898164031457	41.5502711665073	3	-8.429037891296687	41.55023863038474	0
1	ChIJNQ--ucL-JA0R_f_E7DDrQzk	4	1	-8.42898164031457	41.5502711665073	3	-8.42903501043044	41.550280885715466	0
1	ChIJNQ--ucL-JA0R_f_E7DDrQzk	4	1	-8.42898164031457	41.5502711665073	3	-8.428908940632125	41.55033397739851	0
1	ChIJNQ--ucL-JA0R_f_E7DDrQzk	4	2	-8.4286813	41.55027116689804	0	-8.4286813	41.55027116689804	16
1	ChIJNQ--ucL-JA0R_f_E7DDrQzk	4	2	-8.4286813	41.55027116689804	0	-8.4286813	41.55027116689804	16
1	ChIJNQ--ucL-JA0R_f_E7DDrQzk	4	2	-8.4286813	41.55027116689804	0	-8.4286813	41.55027116689804	16
1	ChIJNQ--ucL-JA0R_f_E7DDrQzk	4	2	-8.4286813	41.55027116689804	0	-8.4286813	41.55027116689804	16
1	ChIJNQ--ucL-JA0R_f_E7DDrQzk	4	2	-8.4286813	41.55027116689804	0	-8.4286813	41.55027116689804	16
1	ChIJNQ--ucL-JA0R_f_E7DDrQzk	4	2	-8.4286813	41.55027116689804	0	-8.4286813	41.55027116689804	16
1	ChIJNQ--ucL-JA0R_f_E7DDrQzk	4	2	-8.4286813	41.55027116689804	0	-8.4286813	41.55027116689804	16
1	ChIJNQ--ucL-JA0R_f_E7DDrQzk	4	2	-8.4286813	41.55027116689804	0	-8.4286813	41.55027116689804	16
1	ChIJNQ--ucL-JA0R_f_E7DDrQzk	4	2	-8.4286813	41.55027116689804	0	-8.4286813	41.55027116689804	16
1	ChIJNQ--ucL-JA0R_f_E7DDrQzk	4	2	-8.4286813	41.55027116689804	0	-8.4286813	41.55027116689804	16
1	ChIJNQ--ucL-JA0R_f_E7DDrQzk	4	2	-8.4286813	41.55027116689804	1	-8.428683922487048	41.55026959678683	16
1	ChIJNQ--ucL-JA0R_f_E7DDrQzk	4	2	-8.4286813	41.55027116689804	1	-8.42867779535888	41.55027423187825	16
1	ChIJNQ--ucL-JA0R_f_E7DDrQzk	4	2	-8.4286813	41.55027116689804	1	-8.428677150779452	41.55026721407878	15
1	ChIJNQ--ucL-JA0R_f_E7DDrQzk	4	2	-8.4286813	41.55027116689804	1	-8.428679125741729	41.55027378498342	16
1	ChIJNQ--ucL-JA0R_f_E7DDrQzk	4	2	-8.4286813	41.55027116689804	1	-8.42869695367219	41.550286607699185	18
1	ChIJNQ--ucL-JA0R_f_E7DDrQzk	4	2	-8.4286813	41.55027116689804	1	-8.428680454004093	41.55026829932103	16
1	ChIJNQ--ucL-JA0R_f_E7DDrQzk	4	2	-8.4286813	41.55027116689804	1	-8.4286841121426	41.550269564011124	16
1	ChIJNQ--ucL-JA0R_f_E7DDrQzk	4	2	-8.4286813	41.55027116689804	1	-8.42868745432508	41.550264384983315	15
1	ChIJNQ--ucL-JA0R_f_E7DDrQzk	4	2	-8.4286813	41.55027116689804	1	-8.428688728821513	41.550258347906556	15
1	ChIJNQ--ucL-JA0R_f_E7DDrQzk	4	2	-8.4286813	41.55027116689804	1	-8.428709030987337	41.550245292652555	14
1	ChIJNQ--ucL-JA0R_f_E7DDrQzk	4	2	-8.4286813	41.55027116689804	2	-8.428520972613235	41.55043014620821	0
1	ChIJNQ--ucL-JA0R_f_E7DDrQzk	4	2	-8.4286813	41.55027116689804	2	-8.428705206971637	41.55025824593328	16
1	ChIJNQ--ucL-JA0R_f_E7DDrQzk	4	2	-8.4286813	41.55027116689804	2	-8.428686429177715	41.550477359150634	0
1	ChIJNQ--ucL-JA0R_f_E7DDrQzk	4	2	-8.4286813	41.55027116689804	2	-8.428508002654475	41.550153550265776	7
1	ChIJNQ--ucL-JA0R_f_E7DDrQzk	4	2	-8.4286813	41.55027116689804	2	-8.428019790225608	41.55036742863855	0
1	ChIJNQ--ucL-JA0R_f_E7DDrQzk	4	2	-8.4286813	41.55027116689804	2	-8.428790702381118	41.55033215763599	0
1	ChIJNQ--ucL-JA0R_f_E7DDrQzk	4	2	-8.4286813	41.55027116689804	2	-8.428695438357217	41.550077788361136	1
1	ChIJNQ--ucL-JA0R_f_E7DDrQzk	4	2	-8.4286813	41.55027116689804	2	-8.42828350320647	41.55042447369273	0
1	ChIJNQ--ucL-JA0R_f_E7DDrQzk	4	2	-8.4286813	41.55027116689804	2	-8.42832031471205	41.550042755320874	8
1	ChIJNQ--ucL-JA0R_f_E7DDrQzk	4	2	-8.4286813	41.55027116689804	2	-8.428352397714448	41.550401877531286	0
1	ChIJNQ--ucL-JA0R_f_E7DDrQzk	4	2	-8.4286813	41.55027116689804	3	-8.428658962079947	41.55026818762265	16
1	ChIJNQ--ucL-JA0R_f_E7DDrQzk	4	2	-8.4286813	41.55027116689804	3	-8.428660061369607	41.550273654743144	16
1	ChIJNQ--ucL-JA0R_f_E7DDrQzk	4	2	-8.4286813	41.55027116689804	3	-8.428662115982128	41.55032233881517	20
1	ChIJNQ--ucL-JA0R_f_E7DDrQzk	4	2	-8.4286813	41.55027116689804	3	-8.428808914587622	41.55033600709075	0
1	ChIJNQ--ucL-JA0R_f_E7DDrQzk	4	2	-8.4286813	41.55027116689804	3	-8.428676514665938	41.55035227612588	0
1	ChIJNQ--ucL-JA0R_f_E7DDrQzk	4	2	-8.4286813	41.55027116689804	3	-8.428636697045873	41.55024941450117	15
1	ChIJNQ--ucL-JA0R_f_E7DDrQzk	4	2	-8.4286813	41.55027116689804	3	-8.428686556428518	41.5502878628793	18
1	ChIJNQ--ucL-JA0R_f_E7DDrQzk	4	2	-8.4286813	41.55027116689804	3	-8.428719909021508	41.55026873939374	16
1	ChIJNQ--ucL-JA0R_f_E7DDrQzk	4	2	-8.4286813	41.55027116689804	3	-8.428660487837151	41.550281376876484	17
1	ChIJNQ--ucL-JA0R_f_E7DDrQzk	4	2	-8.4286813	41.55027116689804	3	-8.428686939412353	41.55031189300373	18
1	ChIJNQ--ucL-JA0R_f_E7DDrQzk	4	3	-8.42838095968543	41.5502711665073	0	-8.42838095968543	41.5502711665073	16
1	ChIJNQ--ucL-JA0R_f_E7DDrQzk	4	3	-8.42838095968543	41.5502711665073	0	-8.42838095968543	41.5502711665073	16
1	ChIJNQ--ucL-JA0R_f_E7DDrQzk	4	3	-8.42838095968543	41.5502711665073	0	-8.42838095968543	41.5502711665073	16
1	ChIJNQ--ucL-JA0R_f_E7DDrQzk	4	3	-8.42838095968543	41.5502711665073	0	-8.42838095968543	41.5502711665073	16
1	ChIJNQ--ucL-JA0R_f_E7DDrQzk	4	3	-8.42838095968543	41.5502711665073	0	-8.42838095968543	41.5502711665073	16
1	ChIJNQ--ucL-JA0R_f_E7DDrQzk	4	3	-8.42838095968543	41.5502711665073	0	-8.42838095968543	41.5502711665073	16
1	ChIJNQ--ucL-JA0R_f_E7DDrQzk	4	3	-8.42838095968543	41.5502711665073	0	-8.42838095968543	41.5502711665073	16
1	ChIJNQ--ucL-JA0R_f_E7DDrQzk	4	3	-8.42838095968543	41.5502711665073	0	-8.42838095968543	41.5502711665073	16
1	ChIJNQ--ucL-JA0R_f_E7DDrQzk	4	3	-8.42838095968543	41.5502711665073	0	-8.42838095968543	41.5502711665073	16
1	ChIJNQ--ucL-JA0R_f_E7DDrQzk	4	3	-8.42838095968543	41.5502711665073	0	-8.42838095968543	41.5502711665073	16
1	ChIJNQ--ucL-JA0R_f_E7DDrQzk	4	3	-8.42838095968543	41.5502711665073	1	-8.428382867466867	41.55027016349507	16
1	ChIJNQ--ucL-JA0R_f_E7DDrQzk	4	3	-8.42838095968543	41.5502711665073	1	-8.42838734799049	41.55028511962354	16
1	ChIJNQ--ucL-JA0R_f_E7DDrQzk	4	3	-8.42838095968543	41.5502711665073	1	-8.428380902083056	41.55027505826147	16
1	ChIJNQ--ucL-JA0R_f_E7DDrQzk	4	3	-8.42838095968543	41.5502711665073	1	-8.428370616099702	41.5502602221397	15
1	ChIJNQ--ucL-JA0R_f_E7DDrQzk	4	3	-8.42838095968543	41.5502711665073	1	-8.428389229458354	41.55026955076721	16
1	ChIJNQ--ucL-JA0R_f_E7DDrQzk	4	3	-8.42838095968543	41.5502711665073	1	-8.428379621305229	41.55025300675761	15
1	ChIJNQ--ucL-JA0R_f_E7DDrQzk	4	3	-8.42838095968543	41.5502711665073	1	-8.428378022336707	41.550268624240374	16
1	ChIJNQ--ucL-JA0R_f_E7DDrQzk	4	3	-8.42838095968543	41.5502711665073	1	-8.428379801142118	41.55027351661874	16
1	ChIJNQ--ucL-JA0R_f_E7DDrQzk	4	3	-8.42838095968543	41.5502711665073	1	-8.428378059509786	41.550269123013265	16
1	ChIJNQ--ucL-JA0R_f_E7DDrQzk	4	3	-8.42838095968543	41.5502711665073	1	-8.42839129767457	41.550283082949434	16
1	ChIJNQ--ucL-JA0R_f_E7DDrQzk	4	3	-8.42838095968543	41.5502711665073	2	-8.428484353024412	41.550277626667196	15
1	ChIJNQ--ucL-JA0R_f_E7DDrQzk	4	3	-8.42838095968543	41.5502711665073	2	-8.428483911942395	41.54981131096869	15
1	ChIJNQ--ucL-JA0R_f_E7DDrQzk	4	3	-8.42838095968543	41.5502711665073	2	-8.428039473531939	41.55061497243182	0
1	ChIJNQ--ucL-JA0R_f_E7DDrQzk	4	3	-8.42838095968543	41.5502711665073	2	-8.428388874018987	41.55030408472081	18
1	ChIJNQ--ucL-JA0R_f_E7DDrQzk	4	3	-8.42838095968543	41.5502711665073	2	-8.428599385307392	41.5502354920882	10
1	ChIJNQ--ucL-JA0R_f_E7DDrQzk	4	3	-8.42838095968543	41.5502711665073	2	-8.428399392185446	41.55020170220812	10
1	ChIJNQ--ucL-JA0R_f_E7DDrQzk	4	3	-8.42838095968543	41.5502711665073	2	-8.428378311391095	41.55025989695552	15
1	ChIJNQ--ucL-JA0R_f_E7DDrQzk	4	3	-8.42838095968543	41.5502711665073	2	-8.428577462162673	41.54989162330463	9
1	ChIJNQ--ucL-JA0R_f_E7DDrQzk	4	3	-8.42838095968543	41.5502711665073	2	-8.428901739639471	41.54963089171856	18
1	ChIJNQ--ucL-JA0R_f_E7DDrQzk	4	3	-8.42838095968543	41.5502711665073	2	-8.42852409533598	41.549702367807335	0
1	ChIJNQ--ucL-JA0R_f_E7DDrQzk	4	3	-8.42838095968543	41.5502711665073	3	-8.42834539866103	41.550271377689796	18
1	ChIJNQ--ucL-JA0R_f_E7DDrQzk	4	3	-8.42838095968543	41.5502711665073	3	-8.428400713584125	41.55020501131325	10
1	ChIJNQ--ucL-JA0R_f_E7DDrQzk	4	3	-8.42838095968543	41.5502711665073	3	-8.428391242452602	41.550289930158314	16
1	ChIJNQ--ucL-JA0R_f_E7DDrQzk	4	3	-8.42838095968543	41.5502711665073	3	-8.428271322939782	41.550246425470085	0
1	ChIJNQ--ucL-JA0R_f_E7DDrQzk	4	3	-8.42838095968543	41.5502711665073	3	-8.42847087975379	41.55023634427624	11
1	ChIJNQ--ucL-JA0R_f_E7DDrQzk	4	3	-8.42838095968543	41.5502711665073	3	-8.428320050940826	41.550224131867154	15
1	ChIJNQ--ucL-JA0R_f_E7DDrQzk	4	3	-8.42838095968543	41.5502711665073	3	-8.428447866445136	41.550278008589245	16
1	ChIJNQ--ucL-JA0R_f_E7DDrQzk	4	3	-8.42838095968543	41.5502711665073	3	-8.428397674434727	41.55022475997787	13
1	ChIJNQ--ucL-JA0R_f_E7DDrQzk	4	3	-8.42838095968543	41.5502711665073	3	-8.428521334673409	41.55038308997478	0
1	ChIJNQ--ucL-JA0R_f_E7DDrQzk	4	3	-8.42838095968543	41.5502711665073	3	-8.428416264833581	41.55030060693188	17
1	ChIJNQ--ucL-JA0R_f_E7DDrQzk	4	4	-8.428981639270337	41.550046399609265	0	-8.428981639270337	41.550046399609265	11
1	ChIJNQ--ucL-JA0R_f_E7DDrQzk	4	4	-8.428981639270337	41.550046399609265	0	-8.428981639270337	41.550046399609265	11
1	ChIJNQ--ucL-JA0R_f_E7DDrQzk	4	4	-8.428981639270337	41.550046399609265	0	-8.428981639270337	41.550046399609265	11
1	ChIJNQ--ucL-JA0R_f_E7DDrQzk	4	4	-8.428981639270337	41.550046399609265	0	-8.428981639270337	41.550046399609265	11
1	ChIJNQ--ucL-JA0R_f_E7DDrQzk	4	4	-8.428981639270337	41.550046399609265	0	-8.428981639270337	41.550046399609265	11
1	ChIJNQ--ucL-JA0R_f_E7DDrQzk	4	4	-8.428981639270337	41.550046399609265	0	-8.428981639270337	41.550046399609265	11
1	ChIJNQ--ucL-JA0R_f_E7DDrQzk	4	4	-8.428981639270337	41.550046399609265	0	-8.428981639270337	41.550046399609265	11
1	ChIJNQ--ucL-JA0R_f_E7DDrQzk	4	4	-8.428981639270337	41.550046399609265	0	-8.428981639270337	41.550046399609265	11
1	ChIJNQ--ucL-JA0R_f_E7DDrQzk	4	4	-8.428981639270337	41.550046399609265	0	-8.428981639270337	41.550046399609265	11
1	ChIJNQ--ucL-JA0R_f_E7DDrQzk	4	4	-8.428981639270337	41.550046399609265	0	-8.428981639270337	41.550046399609265	11
1	ChIJNQ--ucL-JA0R_f_E7DDrQzk	4	4	-8.428981639270337	41.550046399609265	1	-8.428987731303502	41.550046068572314	11
1	ChIJNQ--ucL-JA0R_f_E7DDrQzk	4	4	-8.428981639270337	41.550046399609265	1	-8.42898958027153	41.55005513297604	11
1	ChIJNQ--ucL-JA0R_f_E7DDrQzk	4	4	-8.428981639270337	41.550046399609265	1	-8.428974258394087	41.550047259097504	11
1	ChIJNQ--ucL-JA0R_f_E7DDrQzk	4	4	-8.428981639270337	41.550046399609265	1	-8.428963194331603	41.55005471046505	11
1	ChIJNQ--ucL-JA0R_f_E7DDrQzk	4	4	-8.428981639270337	41.550046399609265	1	-8.428988001589575	41.550045853866955	11
1	ChIJNQ--ucL-JA0R_f_E7DDrQzk	4	4	-8.428981639270337	41.550046399609265	1	-8.42898208127407	41.55004921441573	11
1	ChIJNQ--ucL-JA0R_f_E7DDrQzk	4	4	-8.428981639270337	41.550046399609265	1	-8.428984268006289	41.55004079538812	11
1	ChIJNQ--ucL-JA0R_f_E7DDrQzk	4	4	-8.428981639270337	41.550046399609265	1	-8.428969720499092	41.55003844379853	11
1	ChIJNQ--ucL-JA0R_f_E7DDrQzk	4	4	-8.428981639270337	41.550046399609265	1	-8.428984703851226	41.550057809998634	11
1	ChIJNQ--ucL-JA0R_f_E7DDrQzk	4	4	-8.428981639270337	41.550046399609265	1	-8.428979975559024	41.55004751952032	11
1	ChIJNQ--ucL-JA0R_f_E7DDrQzk	4	4	-8.428981639270337	41.550046399609265	2	-8.428641844901321	41.54994930077474	2
1	ChIJNQ--ucL-JA0R_f_E7DDrQzk	4	4	-8.428981639270337	41.550046399609265	2	-8.429113102219132	41.550024905889074	19
1	ChIJNQ--ucL-JA0R_f_E7DDrQzk	4	4	-8.428981639270337	41.550046399609265	2	-8.428969130824834	41.550051921204776	11
1	ChIJNQ--ucL-JA0R_f_E7DDrQzk	4	4	-8.428981639270337	41.550046399609265	2	-8.428690094016458	41.550058072607065	1
1	ChIJNQ--ucL-JA0R_f_E7DDrQzk	4	4	-8.428981639270337	41.550046399609265	2	-8.429179269039656	41.55000240785041	0
1	ChIJNQ--ucL-JA0R_f_E7DDrQzk	4	4	-8.428981639270337	41.550046399609265	2	-8.429114620609695	41.55007338008865	0
1	ChIJNQ--ucL-JA0R_f_E7DDrQzk	4	4	-8.428981639270337	41.550046399609265	2	-8.428289409427036	41.55007188221924	14
1	ChIJNQ--ucL-JA0R_f_E7DDrQzk	4	4	-8.428981639270337	41.550046399609265	2	-8.42897083049279	41.55046539846727	0
1	ChIJNQ--ucL-JA0R_f_E7DDrQzk	4	4	-8.428981639270337	41.550046399609265	2	-8.428844890331037	41.55009621676711	7
1	ChIJNQ--ucL-JA0R_f_E7DDrQzk	4	4	-8.428981639270337	41.550046399609265	2	-8.428964684417274	41.5500438271963	11
1	ChIJNQ--ucL-JA0R_f_E7DDrQzk	4	4	-8.428981639270337	41.550046399609265	3	-8.4289736724247	41.55004607582741	11
1	ChIJNQ--ucL-JA0R_f_E7DDrQzk	4	4	-8.428981639270337	41.550046399609265	3	-8.428968718760022	41.550029289281795	11
1	ChIJNQ--ucL-JA0R_f_E7DDrQzk	4	4	-8.428981639270337	41.550046399609265	3	-8.428959489298546	41.550028554755684	11
1	ChIJNQ--ucL-JA0R_f_E7DDrQzk	4	4	-8.428981639270337	41.550046399609265	3	-8.428991592758427	41.54999531364444	11
1	ChIJNQ--ucL-JA0R_f_E7DDrQzk	4	4	-8.428981639270337	41.550046399609265	3	-8.428980143668598	41.55002934791415	11
1	ChIJNQ--ucL-JA0R_f_E7DDrQzk	4	4	-8.428981639270337	41.550046399609265	3	-8.42898612253123	41.550052525203355	11
1	ChIJNQ--ucL-JA0R_f_E7DDrQzk	4	4	-8.428981639270337	41.550046399609265	3	-8.428846010123385	41.550000710194745	8
1	ChIJNQ--ucL-JA0R_f_E7DDrQzk	4	4	-8.428981639270337	41.550046399609265	3	-8.428983129391698	41.55004569025821	11
1	ChIJNQ--ucL-JA0R_f_E7DDrQzk	4	4	-8.428981639270337	41.550046399609265	3	-8.429017986202382	41.5499386730718	10
1	ChIJNQ--ucL-JA0R_f_E7DDrQzk	4	4	-8.428981639270337	41.550046399609265	3	-8.429157625878974	41.550003356592065	19
1	ChIJNQ--ucL-JA0R_f_E7DDrQzk	4	5	-8.4286813	41.5500464	0	-8.4286813	41.5500464	1
1	ChIJNQ--ucL-JA0R_f_E7DDrQzk	4	5	-8.4286813	41.5500464	0	-8.4286813	41.5500464	1
1	ChIJNQ--ucL-JA0R_f_E7DDrQzk	4	5	-8.4286813	41.5500464	0	-8.4286813	41.5500464	1
1	ChIJNQ--ucL-JA0R_f_E7DDrQzk	4	5	-8.4286813	41.5500464	0	-8.4286813	41.5500464	1
1	ChIJNQ--ucL-JA0R_f_E7DDrQzk	4	5	-8.4286813	41.5500464	0	-8.4286813	41.5500464	1
1	ChIJNQ--ucL-JA0R_f_E7DDrQzk	4	5	-8.4286813	41.5500464	0	-8.4286813	41.5500464	1
1	ChIJNQ--ucL-JA0R_f_E7DDrQzk	4	5	-8.4286813	41.5500464	0	-8.4286813	41.5500464	1
1	ChIJNQ--ucL-JA0R_f_E7DDrQzk	4	5	-8.4286813	41.5500464	0	-8.4286813	41.5500464	1
1	ChIJNQ--ucL-JA0R_f_E7DDrQzk	4	5	-8.4286813	41.5500464	0	-8.4286813	41.5500464	1
1	ChIJNQ--ucL-JA0R_f_E7DDrQzk	4	5	-8.4286813	41.5500464	0	-8.4286813	41.5500464	1
1	ChIJNQ--ucL-JA0R_f_E7DDrQzk	4	5	-8.4286813	41.5500464	1	-8.428745589215355	41.550049591826735	1
1	ChIJNQ--ucL-JA0R_f_E7DDrQzk	4	5	-8.4286813	41.5500464	1	-8.428686360929236	41.550050525683936	1
1	ChIJNQ--ucL-JA0R_f_E7DDrQzk	4	5	-8.4286813	41.5500464	1	-8.428683274397713	41.55004612042727	1
1	ChIJNQ--ucL-JA0R_f_E7DDrQzk	4	5	-8.4286813	41.5500464	1	-8.42867904846	41.550040291207715	1
1	ChIJNQ--ucL-JA0R_f_E7DDrQzk	4	5	-8.4286813	41.5500464	1	-8.428713285433123	41.550061986599715	1
1	ChIJNQ--ucL-JA0R_f_E7DDrQzk	4	5	-8.4286813	41.5500464	1	-8.428680183762221	41.55004851231984	1
1	ChIJNQ--ucL-JA0R_f_E7DDrQzk	4	5	-8.4286813	41.5500464	1	-8.428688937245195	41.550052377159254	1
1	ChIJNQ--ucL-JA0R_f_E7DDrQzk	4	5	-8.4286813	41.5500464	1	-8.428689533688566	41.55004192833106	1
1	ChIJNQ--ucL-JA0R_f_E7DDrQzk	4	5	-8.4286813	41.5500464	1	-8.428680496210655	41.55004696283647	1
1	ChIJNQ--ucL-JA0R_f_E7DDrQzk	4	5	-8.4286813	41.5500464	1	-8.428676498234793	41.55005094363411	1
1	ChIJNQ--ucL-JA0R_f_E7DDrQzk	4	5	-8.4286813	41.5500464	2	-8.427613185984367	41.54918740065959	0
1	ChIJNQ--ucL-JA0R_f_E7DDrQzk	4	5	-8.4286813	41.5500464	2	-8.428988804855976	41.55001798171388	12
1	ChIJNQ--ucL-JA0R_f_E7DDrQzk	4	5	-8.4286813	41.5500464	2	-8.429020111098573	41.55008932640463	14
1	ChIJNQ--ucL-JA0R_f_E7DDrQzk	4	5	-8.4286813	41.5500464	2	-8.429267461714744	41.54956956368222	0
1	ChIJNQ--ucL-JA0R_f_E7DDrQzk	4	5	-8.4286813	41.5500464	2	-8.428698534012026	41.549987018868	2
1	ChIJNQ--ucL-JA0R_f_E7DDrQzk	4	5	-8.4286813	41.5500464	2	-8.428672031650194	41.550096746982064	1
1	ChIJNQ--ucL-JA0R_f_E7DDrQzk	4	5	-8.4286813	41.5500464	2	-8.428480612612441	41.54998345547556	4
1	ChIJNQ--ucL-JA0R_f_E7DDrQzk	4	5	-8.4286813	41.5500464	2	-8.428568862980205	41.54981387568315	16
1	ChIJNQ--ucL-JA0R_f_E7DDrQzk	4	5	-8.4286813	41.5500464	2	-8.42873964572441	41.55005228325982	1
1	ChIJNQ--ucL-JA0R_f_E7DDrQzk	4	5	-8.4286813	41.5500464	2	-8.428417247366939	41.549745372751055	0
1	ChIJNQ--ucL-JA0R_f_E7DDrQzk	4	5	-8.4286813	41.5500464	3	-8.428565703100139	41.550119138935585	2
1	ChIJNQ--ucL-JA0R_f_E7DDrQzk	4	5	-8.4286813	41.5500464	3	-8.428728284366722	41.54999408056774	2
1	ChIJNQ--ucL-JA0R_f_E7DDrQzk	4	5	-8.4286813	41.5500464	3	-8.428678834346133	41.55004602793925	1
1	ChIJNQ--ucL-JA0R_f_E7DDrQzk	4	5	-8.4286813	41.5500464	3	-8.428692197969308	41.550028435395035	1
1	ChIJNQ--ucL-JA0R_f_E7DDrQzk	4	5	-8.4286813	41.5500464	3	-8.428685576770222	41.55005650016196	1
1	ChIJNQ--ucL-JA0R_f_E7DDrQzk	4	5	-8.4286813	41.5500464	3	-8.428666848541804	41.550068264733504	1
1	ChIJNQ--ucL-JA0R_f_E7DDrQzk	4	5	-8.4286813	41.5500464	3	-8.428678372761189	41.550046847779115	1
1	ChIJNQ--ucL-JA0R_f_E7DDrQzk	4	5	-8.4286813	41.5500464	3	-8.428699096564394	41.550043934482765	1
1	ChIJNQ--ucL-JA0R_f_E7DDrQzk	4	5	-8.4286813	41.5500464	3	-8.428817795277107	41.550069645272195	6
1	ChIJNQ--ucL-JA0R_f_E7DDrQzk	4	5	-8.4286813	41.5500464	3	-8.4286399358652	41.55009832069431	2
1	ChIJNQ--ucL-JA0R_f_E7DDrQzk	4	6	-8.428380960729662	41.550046399609265	0	-8.428380960729662	41.550046399609265	4
1	ChIJNQ--ucL-JA0R_f_E7DDrQzk	4	6	-8.428380960729662	41.550046399609265	0	-8.428380960729662	41.550046399609265	4
1	ChIJNQ--ucL-JA0R_f_E7DDrQzk	4	6	-8.428380960729662	41.550046399609265	0	-8.428380960729662	41.550046399609265	4
1	ChIJNQ--ucL-JA0R_f_E7DDrQzk	4	6	-8.428380960729662	41.550046399609265	0	-8.428380960729662	41.550046399609265	4
1	ChIJNQ--ucL-JA0R_f_E7DDrQzk	4	6	-8.428380960729662	41.550046399609265	0	-8.428380960729662	41.550046399609265	4
1	ChIJNQ--ucL-JA0R_f_E7DDrQzk	4	6	-8.428380960729662	41.550046399609265	0	-8.428380960729662	41.550046399609265	4
1	ChIJNQ--ucL-JA0R_f_E7DDrQzk	4	6	-8.428380960729662	41.550046399609265	0	-8.428380960729662	41.550046399609265	4
1	ChIJNQ--ucL-JA0R_f_E7DDrQzk	4	6	-8.428380960729662	41.550046399609265	0	-8.428380960729662	41.550046399609265	4
1	ChIJNQ--ucL-JA0R_f_E7DDrQzk	4	6	-8.428380960729662	41.550046399609265	0	-8.428380960729662	41.550046399609265	4
1	ChIJNQ--ucL-JA0R_f_E7DDrQzk	4	6	-8.428380960729662	41.550046399609265	0	-8.428380960729662	41.550046399609265	4
1	ChIJNQ--ucL-JA0R_f_E7DDrQzk	4	6	-8.428380960729662	41.550046399609265	1	-8.428381349598116	41.55004293553323	4
1	ChIJNQ--ucL-JA0R_f_E7DDrQzk	4	6	-8.428380960729662	41.550046399609265	1	-8.428400449149404	41.550043639425844	4
1	ChIJNQ--ucL-JA0R_f_E7DDrQzk	4	6	-8.428380960729662	41.550046399609265	1	-8.428426715554014	41.55004607761338	4
1	ChIJNQ--ucL-JA0R_f_E7DDrQzk	4	6	-8.428380960729662	41.550046399609265	1	-8.428384709155473	41.55004982062799	4
1	ChIJNQ--ucL-JA0R_f_E7DDrQzk	4	6	-8.428380960729662	41.550046399609265	1	-8.428399570845322	41.55004899915072	4
1	ChIJNQ--ucL-JA0R_f_E7DDrQzk	4	6	-8.428380960729662	41.550046399609265	1	-8.428387040096208	41.550048201049	4
1	ChIJNQ--ucL-JA0R_f_E7DDrQzk	4	6	-8.428380960729662	41.550046399609265	1	-8.428380616377154	41.55004651155226	4
1	ChIJNQ--ucL-JA0R_f_E7DDrQzk	4	6	-8.428380960729662	41.550046399609265	1	-8.428376747141076	41.55003873231739	5
1	ChIJNQ--ucL-JA0R_f_E7DDrQzk	4	6	-8.428380960729662	41.550046399609265	1	-8.428383218325536	41.55004233410195	4
1	ChIJNQ--ucL-JA0R_f_E7DDrQzk	4	6	-8.428380960729662	41.550046399609265	1	-8.428389807808102	41.55005195803105	4
1	ChIJNQ--ucL-JA0R_f_E7DDrQzk	4	6	-8.428380960729662	41.550046399609265	2	-8.428193663138504	41.55020555118914	0
1	ChIJNQ--ucL-JA0R_f_E7DDrQzk	4	6	-8.428380960729662	41.550046399609265	2	-8.428162639489058	41.55040676923754	0
1	ChIJNQ--ucL-JA0R_f_E7DDrQzk	4	6	-8.428380960729662	41.550046399609265	2	-8.428360872084163	41.55010955202092	9
1	ChIJNQ--ucL-JA0R_f_E7DDrQzk	4	6	-8.428380960729662	41.550046399609265	2	-8.428825600631265	41.55004828754624	7
1	ChIJNQ--ucL-JA0R_f_E7DDrQzk	4	6	-8.428380960729662	41.550046399609265	2	-8.428565346252594	41.549920923301315	6
1	ChIJNQ--ucL-JA0R_f_E7DDrQzk	4	6	-8.428380960729662	41.550046399609265	2	-8.428289470541408	41.55009094578167	12
1	ChIJNQ--ucL-JA0R_f_E7DDrQzk	4	6	-8.428380960729662	41.550046399609265	2	-8.42842912248674	41.550027543621944	3
1	ChIJNQ--ucL-JA0R_f_E7DDrQzk	4	6	-8.428380960729662	41.550046399609265	2	-8.428521545693417	41.54996189156707	5
1	ChIJNQ--ucL-JA0R_f_E7DDrQzk	4	6	-8.428380960729662	41.550046399609265	2	-8.428671320450807	41.550389283964435	0
1	ChIJNQ--ucL-JA0R_f_E7DDrQzk	4	6	-8.428380960729662	41.550046399609265	2	-8.427840737915227	41.54980433757303	0
1	ChIJNQ--ucL-JA0R_f_E7DDrQzk	4	6	-8.428380960729662	41.550046399609265	3	-8.428304044363115	41.550069868679664	13
1	ChIJNQ--ucL-JA0R_f_E7DDrQzk	4	6	-8.428380960729662	41.550046399609265	3	-8.428353263973799	41.550107864333185	9
1	ChIJNQ--ucL-JA0R_f_E7DDrQzk	4	6	-8.428380960729662	41.550046399609265	3	-8.428440051981273	41.54999975304102	4
1	ChIJNQ--ucL-JA0R_f_E7DDrQzk	4	6	-8.428380960729662	41.550046399609265	3	-8.428222331168396	41.5500845630423	0
1	ChIJNQ--ucL-JA0R_f_E7DDrQzk	4	6	-8.428380960729662	41.550046399609265	3	-8.428372365226105	41.55006162212057	4
1	ChIJNQ--ucL-JA0R_f_E7DDrQzk	4	6	-8.428380960729662	41.550046399609265	3	-8.428394011263812	41.55005716979077	4
1	ChIJNQ--ucL-JA0R_f_E7DDrQzk	4	6	-8.428380960729662	41.550046399609265	3	-8.428402657908096	41.55003820109617	4
1	ChIJNQ--ucL-JA0R_f_E7DDrQzk	4	6	-8.428380960729662	41.550046399609265	3	-8.428424860314474	41.55007131865669	4
1	ChIJNQ--ucL-JA0R_f_E7DDrQzk	4	6	-8.428380960729662	41.550046399609265	3	-8.42837361770878	41.55004658968159	4
1	ChIJNQ--ucL-JA0R_f_E7DDrQzk	4	6	-8.428380960729662	41.550046399609265	3	-8.428209029450633	41.54999624470632	0
1	ChIJNQ--ucL-JA0R_f_E7DDrQzk	4	7	-8.428981638226116	41.549821632711215	0	-8.428981638226116	41.549821632711215	14
1	ChIJNQ--ucL-JA0R_f_E7DDrQzk	4	7	-8.428981638226116	41.549821632711215	0	-8.428981638226116	41.549821632711215	14
1	ChIJNQ--ucL-JA0R_f_E7DDrQzk	4	7	-8.428981638226116	41.549821632711215	0	-8.428981638226116	41.549821632711215	14
1	ChIJNQ--ucL-JA0R_f_E7DDrQzk	4	7	-8.428981638226116	41.549821632711215	0	-8.428981638226116	41.549821632711215	14
1	ChIJNQ--ucL-JA0R_f_E7DDrQzk	4	7	-8.428981638226116	41.549821632711215	0	-8.428981638226116	41.549821632711215	14
1	ChIJNQ--ucL-JA0R_f_E7DDrQzk	4	7	-8.428981638226116	41.549821632711215	0	-8.428981638226116	41.549821632711215	14
1	ChIJNQ--ucL-JA0R_f_E7DDrQzk	4	7	-8.428981638226116	41.549821632711215	0	-8.428981638226116	41.549821632711215	14
1	ChIJNQ--ucL-JA0R_f_E7DDrQzk	4	7	-8.428981638226116	41.549821632711215	0	-8.428981638226116	41.549821632711215	14
1	ChIJNQ--ucL-JA0R_f_E7DDrQzk	4	7	-8.428981638226116	41.549821632711215	0	-8.428981638226116	41.549821632711215	14
1	ChIJNQ--ucL-JA0R_f_E7DDrQzk	4	7	-8.428981638226116	41.549821632711215	0	-8.428981638226116	41.549821632711215	14
1	ChIJNQ--ucL-JA0R_f_E7DDrQzk	4	7	-8.428981638226116	41.549821632711215	1	-8.428980210660736	41.54982416975748	14
1	ChIJNQ--ucL-JA0R_f_E7DDrQzk	4	7	-8.428981638226116	41.549821632711215	1	-8.428952508851312	41.549802132623554	12
1	ChIJNQ--ucL-JA0R_f_E7DDrQzk	4	7	-8.428981638226116	41.549821632711215	1	-8.428985388540676	41.54983317848211	12
1	ChIJNQ--ucL-JA0R_f_E7DDrQzk	4	7	-8.428981638226116	41.549821632711215	1	-8.428965241672941	41.54981649649506	13
1	ChIJNQ--ucL-JA0R_f_E7DDrQzk	4	7	-8.428981638226116	41.549821632711215	1	-8.428989940939362	41.549825747579156	14
1	ChIJNQ--ucL-JA0R_f_E7DDrQzk	4	7	-8.428981638226116	41.549821632711215	1	-8.428989196761684	41.549821661328465	15
1	ChIJNQ--ucL-JA0R_f_E7DDrQzk	4	7	-8.428981638226116	41.549821632711215	1	-8.428986172726898	41.54982224145118	15
1	ChIJNQ--ucL-JA0R_f_E7DDrQzk	4	7	-8.428981638226116	41.549821632711215	1	-8.428976587597996	41.5498296667702	13
1	ChIJNQ--ucL-JA0R_f_E7DDrQzk	4	7	-8.428981638226116	41.549821632711215	1	-8.42895392939711	41.54982060246243	12
1	ChIJNQ--ucL-JA0R_f_E7DDrQzk	4	7	-8.428981638226116	41.549821632711215	1	-8.42898755100049	41.54982261379165	15
1	ChIJNQ--ucL-JA0R_f_E7DDrQzk	4	7	-8.428981638226116	41.549821632711215	2	-8.428909612626478	41.54972715145545	17
1	ChIJNQ--ucL-JA0R_f_E7DDrQzk	4	7	-8.428981638226116	41.549821632711215	2	-8.42864837375326	41.549727182741336	17
1	ChIJNQ--ucL-JA0R_f_E7DDrQzk	4	7	-8.428981638226116	41.549821632711215	2	-8.428689729157917	41.5498783519054	8
1	ChIJNQ--ucL-JA0R_f_E7DDrQzk	4	7	-8.428981638226116	41.549821632711215	2	-8.42884208271941	41.549478358901375	0
1	ChIJNQ--ucL-JA0R_f_E7DDrQzk	4	7	-8.428981638226116	41.549821632711215	2	-8.429162001631312	41.54986261492909	19
1	ChIJNQ--ucL-JA0R_f_E7DDrQzk	4	7	-8.428981638226116	41.549821632711215	2	-8.428422885649843	41.54929768658404	0
1	ChIJNQ--ucL-JA0R_f_E7DDrQzk	4	7	-8.428981638226116	41.549821632711215	2	-8.42916674551169	41.54988335596551	0
1	ChIJNQ--ucL-JA0R_f_E7DDrQzk	4	7	-8.428981638226116	41.549821632711215	2	-8.428856071310754	41.54988855339644	6
1	ChIJNQ--ucL-JA0R_f_E7DDrQzk	4	7	-8.428981638226116	41.549821632711215	2	-8.429246269948075	41.54982700868062	0
1	ChIJNQ--ucL-JA0R_f_E7DDrQzk	4	7	-8.428981638226116	41.549821632711215	2	-8.428827774054108	41.550359942416975	0
1	ChIJNQ--ucL-JA0R_f_E7DDrQzk	4	7	-8.428981638226116	41.549821632711215	3	-8.428972007852296	41.54977512163847	15
1	ChIJNQ--ucL-JA0R_f_E7DDrQzk	4	7	-8.428981638226116	41.549821632711215	3	-8.428943015306425	41.54983757776883	12
1	ChIJNQ--ucL-JA0R_f_E7DDrQzk	4	7	-8.428981638226116	41.549821632711215	3	-8.428989451503684	41.54980872428817	15
1	ChIJNQ--ucL-JA0R_f_E7DDrQzk	4	7	-8.428981638226116	41.549821632711215	3	-8.429002995376559	41.54987744398345	12
1	ChIJNQ--ucL-JA0R_f_E7DDrQzk	4	7	-8.428981638226116	41.549821632711215	3	-8.429150429698298	41.54985860609496	18
1	ChIJNQ--ucL-JA0R_f_E7DDrQzk	4	7	-8.428981638226116	41.549821632711215	3	-8.429084420858617	41.54982100362173	17
1	ChIJNQ--ucL-JA0R_f_E7DDrQzk	4	7	-8.428981638226116	41.549821632711215	3	-8.428941403984386	41.549819816017155	12
1	ChIJNQ--ucL-JA0R_f_E7DDrQzk	4	7	-8.428981638226116	41.549821632711215	3	-8.42886853564818	41.54971889195418	17
1	ChIJNQ--ucL-JA0R_f_E7DDrQzk	4	7	-8.428981638226116	41.549821632711215	3	-8.429059085611975	41.5498393909295	17
1	ChIJNQ--ucL-JA0R_f_E7DDrQzk	4	7	-8.428981638226116	41.549821632711215	3	-8.428994343770853	41.5498255213647	14
1	ChIJNQ--ucL-JA0R_f_E7DDrQzk	4	8	-8.4286813	41.54982163310196	0	-8.4286813	41.54982163310196	13
1	ChIJNQ--ucL-JA0R_f_E7DDrQzk	4	8	-8.4286813	41.54982163310196	0	-8.4286813	41.54982163310196	13
1	ChIJNQ--ucL-JA0R_f_E7DDrQzk	4	8	-8.4286813	41.54982163310196	0	-8.4286813	41.54982163310196	13
1	ChIJNQ--ucL-JA0R_f_E7DDrQzk	4	8	-8.4286813	41.54982163310196	0	-8.4286813	41.54982163310196	13
1	ChIJNQ--ucL-JA0R_f_E7DDrQzk	4	8	-8.4286813	41.54982163310196	0	-8.4286813	41.54982163310196	13
1	ChIJNQ--ucL-JA0R_f_E7DDrQzk	4	8	-8.4286813	41.54982163310196	0	-8.4286813	41.54982163310196	13
1	ChIJNQ--ucL-JA0R_f_E7DDrQzk	4	8	-8.4286813	41.54982163310196	0	-8.4286813	41.54982163310196	13
1	ChIJNQ--ucL-JA0R_f_E7DDrQzk	4	8	-8.4286813	41.54982163310196	0	-8.4286813	41.54982163310196	13
1	ChIJNQ--ucL-JA0R_f_E7DDrQzk	4	8	-8.4286813	41.54982163310196	0	-8.4286813	41.54982163310196	13
1	ChIJNQ--ucL-JA0R_f_E7DDrQzk	4	8	-8.4286813	41.54982163310196	0	-8.4286813	41.54982163310196	13
1	ChIJNQ--ucL-JA0R_f_E7DDrQzk	4	8	-8.4286813	41.54982163310196	1	-8.428683280863561	41.54981987758664	13
1	ChIJNQ--ucL-JA0R_f_E7DDrQzk	4	8	-8.4286813	41.54982163310196	1	-8.42865185627924	41.549809114963544	13
1	ChIJNQ--ucL-JA0R_f_E7DDrQzk	4	8	-8.4286813	41.54982163310196	1	-8.428692135509117	41.549823378532295	13
1	ChIJNQ--ucL-JA0R_f_E7DDrQzk	4	8	-8.4286813	41.54982163310196	1	-8.428671106605364	41.54983116585378	12
1	ChIJNQ--ucL-JA0R_f_E7DDrQzk	4	8	-8.4286813	41.54982163310196	1	-8.42868903943519	41.54982261165126	13
1	ChIJNQ--ucL-JA0R_f_E7DDrQzk	4	8	-8.4286813	41.54982163310196	1	-8.428679739172438	41.549813658430544	13
1	ChIJNQ--ucL-JA0R_f_E7DDrQzk	4	8	-8.4286813	41.54982163310196	1	-8.42868407772978	41.54981597921511	13
1	ChIJNQ--ucL-JA0R_f_E7DDrQzk	4	8	-8.4286813	41.54982163310196	1	-8.428666868797375	41.54981555660286	13
1	ChIJNQ--ucL-JA0R_f_E7DDrQzk	4	8	-8.4286813	41.54982163310196	1	-8.428688744368863	41.549813628373684	13
1	ChIJNQ--ucL-JA0R_f_E7DDrQzk	4	8	-8.4286813	41.54982163310196	1	-8.42868828959073	41.54981973623789	13
1	ChIJNQ--ucL-JA0R_f_E7DDrQzk	4	8	-8.4286813	41.54982163310196	2	-8.428526397699784	41.54891619826812	0
1	ChIJNQ--ucL-JA0R_f_E7DDrQzk	4	8	-8.4286813	41.54982163310196	2	-8.428607140403939	41.54989499060275	8
1	ChIJNQ--ucL-JA0R_f_E7DDrQzk	4	8	-8.4286813	41.54982163310196	2	-8.428194809932602	41.549595042954905	0
1	ChIJNQ--ucL-JA0R_f_E7DDrQzk	4	8	-8.4286813	41.54982163310196	2	-8.428588527071794	41.54950232309069	0
1	ChIJNQ--ucL-JA0R_f_E7DDrQzk	4	8	-8.4286813	41.54982163310196	2	-8.429007109170492	41.549428352048785	0
1	ChIJNQ--ucL-JA0R_f_E7DDrQzk	4	8	-8.4286813	41.54982163310196	2	-8.428432808568404	41.54988150357554	13
1	ChIJNQ--ucL-JA0R_f_E7DDrQzk	4	8	-8.4286813	41.54982163310196	2	-8.428638894829227	41.549975267353226	2
1	ChIJNQ--ucL-JA0R_f_E7DDrQzk	4	8	-8.4286813	41.54982163310196	2	-8.428706264467506	41.549727355361114	16
1	ChIJNQ--ucL-JA0R_f_E7DDrQzk	4	8	-8.4286813	41.54982163310196	2	-8.428751377619818	41.55007767941185	2
1	ChIJNQ--ucL-JA0R_f_E7DDrQzk	4	8	-8.4286813	41.54982163310196	2	-8.42893760346905	41.54971326985885	17
1	ChIJNQ--ucL-JA0R_f_E7DDrQzk	4	8	-8.4286813	41.54982163310196	3	-8.428673059356258	41.54982178783854	13
1	ChIJNQ--ucL-JA0R_f_E7DDrQzk	4	8	-8.4286813	41.54982163310196	3	-8.428736549388773	41.549822057688544	13
1	ChIJNQ--ucL-JA0R_f_E7DDrQzk	4	8	-8.4286813	41.54982163310196	3	-8.428686234521283	41.54981372540607	13
1	ChIJNQ--ucL-JA0R_f_E7DDrQzk	4	8	-8.4286813	41.54982163310196	3	-8.428639237620652	41.54983842142036	12
1	ChIJNQ--ucL-JA0R_f_E7DDrQzk	4	8	-8.4286813	41.54982163310196	3	-8.42873516789163	41.54986502682515	8
1	ChIJNQ--ucL-JA0R_f_E7DDrQzk	4	8	-8.4286813	41.54982163310196	3	-8.428687536586917	41.54982213428539	13
1	ChIJNQ--ucL-JA0R_f_E7DDrQzk	4	8	-8.4286813	41.54982163310196	3	-8.42880293307575	41.5498791236437	6
1	ChIJNQ--ucL-JA0R_f_E7DDrQzk	4	8	-8.4286813	41.54982163310196	3	-8.428703876230049	41.549732782227814	15
1	ChIJNQ--ucL-JA0R_f_E7DDrQzk	4	8	-8.4286813	41.54982163310196	3	-8.428682605860846	41.54980515396488	13
1	ChIJNQ--ucL-JA0R_f_E7DDrQzk	4	8	-8.4286813	41.54982163310196	3	-8.428593616514384	41.54983977803362	14
1	ChIJNQ--ucL-JA0R_f_E7DDrQzk	4	9	-8.428380961773883	41.549821632711215	0	-8.428380961773883	41.549821632711215	0
1	ChIJNQ--ucL-JA0R_f_E7DDrQzk	4	9	-8.428380961773883	41.549821632711215	0	-8.428380961773883	41.549821632711215	0
1	ChIJNQ--ucL-JA0R_f_E7DDrQzk	4	9	-8.428380961773883	41.549821632711215	0	-8.428380961773883	41.549821632711215	0
1	ChIJNQ--ucL-JA0R_f_E7DDrQzk	4	9	-8.428380961773883	41.549821632711215	0	-8.428380961773883	41.549821632711215	0
1	ChIJNQ--ucL-JA0R_f_E7DDrQzk	4	9	-8.428380961773883	41.549821632711215	0	-8.428380961773883	41.549821632711215	0
1	ChIJNQ--ucL-JA0R_f_E7DDrQzk	4	9	-8.428380961773883	41.549821632711215	0	-8.428380961773883	41.549821632711215	0
1	ChIJNQ--ucL-JA0R_f_E7DDrQzk	4	9	-8.428380961773883	41.549821632711215	0	-8.428380961773883	41.549821632711215	0
1	ChIJNQ--ucL-JA0R_f_E7DDrQzk	4	9	-8.428380961773883	41.549821632711215	0	-8.428380961773883	41.549821632711215	0
1	ChIJNQ--ucL-JA0R_f_E7DDrQzk	4	9	-8.428380961773883	41.549821632711215	0	-8.428380961773883	41.549821632711215	0
1	ChIJNQ--ucL-JA0R_f_E7DDrQzk	4	9	-8.428380961773883	41.549821632711215	0	-8.428380961773883	41.549821632711215	0
1	ChIJNQ--ucL-JA0R_f_E7DDrQzk	4	9	-8.428380961773883	41.549821632711215	1	-8.428375668380054	41.54981201953518	0
1	ChIJNQ--ucL-JA0R_f_E7DDrQzk	4	9	-8.428380961773883	41.549821632711215	1	-8.42838799712012	41.5498208244854	0
1	ChIJNQ--ucL-JA0R_f_E7DDrQzk	4	9	-8.428380961773883	41.549821632711215	1	-8.428356225076621	41.54981684692734	0
1	ChIJNQ--ucL-JA0R_f_E7DDrQzk	4	9	-8.428380961773883	41.549821632711215	1	-8.42832607850938	41.549830202408195	20
1	ChIJNQ--ucL-JA0R_f_E7DDrQzk	4	9	-8.428380961773883	41.549821632711215	1	-8.428368761855074	41.549839213016455	20
1	ChIJNQ--ucL-JA0R_f_E7DDrQzk	4	9	-8.428380961773883	41.549821632711215	1	-8.428356105545374	41.549836445241894	20
1	ChIJNQ--ucL-JA0R_f_E7DDrQzk	4	9	-8.428380961773883	41.549821632711215	1	-8.428374960086638	41.54982075824226	0
1	ChIJNQ--ucL-JA0R_f_E7DDrQzk	4	9	-8.428380961773883	41.549821632711215	1	-8.42838362583504	41.54982895770142	20
1	ChIJNQ--ucL-JA0R_f_E7DDrQzk	4	9	-8.428380961773883	41.549821632711215	1	-8.428384662881804	41.549821549214606	0
1	ChIJNQ--ucL-JA0R_f_E7DDrQzk	4	9	-8.428380961773883	41.549821632711215	1	-8.428369423813718	41.5498194160184	0
1	ChIJNQ--ucL-JA0R_f_E7DDrQzk	4	9	-8.428380961773883	41.549821632711215	2	-8.428334449648803	41.549624931635485	0
1	ChIJNQ--ucL-JA0R_f_E7DDrQzk	4	9	-8.428380961773883	41.549821632711215	2	-8.428215895400912	41.55002437343854	0
1	ChIJNQ--ucL-JA0R_f_E7DDrQzk	4	9	-8.428380961773883	41.549821632711215	2	-8.428777125597449	41.549979871653306	5
1	ChIJNQ--ucL-JA0R_f_E7DDrQzk	4	9	-8.428380961773883	41.549821632711215	2	-8.427947897103142	41.54932236334421	0
1	ChIJNQ--ucL-JA0R_f_E7DDrQzk	4	9	-8.428380961773883	41.549821632711215	2	-8.428766535665567	41.54949251486013	0
1	ChIJNQ--ucL-JA0R_f_E7DDrQzk	4	9	-8.428380961773883	41.549821632711215	2	-8.428349913765787	41.549287498622256	0
1	ChIJNQ--ucL-JA0R_f_E7DDrQzk	4	9	-8.428380961773883	41.549821632711215	2	-8.428087130642085	41.54964124735992	0
1	ChIJNQ--ucL-JA0R_f_E7DDrQzk	4	9	-8.428380961773883	41.549821632711215	2	-8.428360522879574	41.54983391512506	20
1	ChIJNQ--ucL-JA0R_f_E7DDrQzk	4	9	-8.428380961773883	41.549821632711215	2	-8.428406442348328	41.549752689367565	0
1	ChIJNQ--ucL-JA0R_f_E7DDrQzk	4	9	-8.428380961773883	41.549821632711215	2	-8.428860887122397	41.54992405837208	6
1	ChIJNQ--ucL-JA0R_f_E7DDrQzk	4	9	-8.428380961773883	41.549821632711215	3	-8.428376974635357	41.54984739357981	20
1	ChIJNQ--ucL-JA0R_f_E7DDrQzk	4	9	-8.428380961773883	41.549821632711215	3	-8.428345156671543	41.54984083988331	20
1	ChIJNQ--ucL-JA0R_f_E7DDrQzk	4	9	-8.428380961773883	41.549821632711215	3	-8.428432154589412	41.549783658073395	20
1	ChIJNQ--ucL-JA0R_f_E7DDrQzk	4	9	-8.428380961773883	41.549821632711215	3	-8.428425199714662	41.54987602899106	14
1	ChIJNQ--ucL-JA0R_f_E7DDrQzk	4	9	-8.428380961773883	41.549821632711215	3	-8.428463760108144	41.5498519920916	14
1	ChIJNQ--ucL-JA0R_f_E7DDrQzk	4	9	-8.428380961773883	41.549821632711215	3	-8.428313681876197	41.5498985002376	19
1	ChIJNQ--ucL-JA0R_f_E7DDrQzk	4	9	-8.428380961773883	41.549821632711215	3	-8.428265294617002	41.54990206383436	20
1	ChIJNQ--ucL-JA0R_f_E7DDrQzk	4	9	-8.428380961773883	41.549821632711215	3	-8.428411143679586	41.54983130531427	19
1	ChIJNQ--ucL-JA0R_f_E7DDrQzk	4	9	-8.428380961773883	41.549821632711215	3	-8.428365262244531	41.549781328007775	0
1	ChIJNQ--ucL-JA0R_f_E7DDrQzk	4	9	-8.428380961773883	41.549821632711215	3	-8.428399139622348	41.54980649995774	0
1	ChIJoUEJQq7GhkcRI153LB6-eXY	3	1	9.191234014151439	45.466052366449944	0	9.191234014151439	45.466052366449944	0
1	ChIJoUEJQq7GhkcRI153LB6-eXY	3	1	9.191234014151439	45.466052366449944	0	9.191234014151439	45.466052366449944	0
1	ChIJoUEJQq7GhkcRI153LB6-eXY	3	1	9.191234014151439	45.466052366449944	0	9.191234014151439	45.466052366449944	0
1	ChIJoUEJQq7GhkcRI153LB6-eXY	3	1	9.191234014151439	45.466052366449944	0	9.191234014151439	45.466052366449944	0
1	ChIJoUEJQq7GhkcRI153LB6-eXY	3	1	9.191234014151439	45.466052366449944	0	9.191234014151439	45.466052366449944	0
1	ChIJoUEJQq7GhkcRI153LB6-eXY	3	1	9.191234014151439	45.466052366449944	0	9.191234014151439	45.466052366449944	0
1	ChIJoUEJQq7GhkcRI153LB6-eXY	3	1	9.191234014151439	45.466052366449944	0	9.191234014151439	45.466052366449944	0
1	ChIJoUEJQq7GhkcRI153LB6-eXY	3	1	9.191234014151439	45.466052366449944	0	9.191234014151439	45.466052366449944	0
1	ChIJoUEJQq7GhkcRI153LB6-eXY	3	1	9.191234014151439	45.466052366449944	0	9.191234014151439	45.466052366449944	0
1	ChIJoUEJQq7GhkcRI153LB6-eXY	3	1	9.191234014151439	45.466052366449944	0	9.191234014151439	45.466052366449944	0
1	ChIJoUEJQq7GhkcRI153LB6-eXY	3	1	9.191234014151439	45.466052366449944	1	9.191227706092473	45.466037320839725	0
1	ChIJoUEJQq7GhkcRI153LB6-eXY	3	1	9.191234014151439	45.466052366449944	1	9.19123530208913	45.466045504843194	0
1	ChIJoUEJQq7GhkcRI153LB6-eXY	3	1	9.191234014151439	45.466052366449944	1	9.191228251821498	45.466057950999925	0
1	ChIJoUEJQq7GhkcRI153LB6-eXY	3	1	9.191234014151439	45.466052366449944	1	9.191226810002625	45.46606546752526	0
1	ChIJoUEJQq7GhkcRI153LB6-eXY	3	1	9.191234014151439	45.466052366449944	1	9.191221127161857	45.466051982521236	0
1	ChIJoUEJQq7GhkcRI153LB6-eXY	3	1	9.191234014151439	45.466052366449944	1	9.19125424878972	45.466060602766404	0
1	ChIJoUEJQq7GhkcRI153LB6-eXY	3	1	9.191234014151439	45.466052366449944	1	9.191232339550053	45.46605284050402	0
1	ChIJoUEJQq7GhkcRI153LB6-eXY	3	1	9.191234014151439	45.466052366449944	1	9.191237082682902	45.46604544137485	0
1	ChIJoUEJQq7GhkcRI153LB6-eXY	3	1	9.191234014151439	45.466052366449944	1	9.19123392806511	45.46605145087384	0
1	ChIJoUEJQq7GhkcRI153LB6-eXY	3	1	9.191234014151439	45.466052366449944	1	9.191217710084112	45.46606079796333	0
1	ChIJoUEJQq7GhkcRI153LB6-eXY	3	1	9.191234014151439	45.466052366449944	2	9.19146535494108	45.466344833365625	0
1	ChIJoUEJQq7GhkcRI153LB6-eXY	3	1	9.191234014151439	45.466052366449944	2	9.191383085560384	45.46633214928464	0
1	ChIJoUEJQq7GhkcRI153LB6-eXY	3	1	9.191234014151439	45.466052366449944	2	9.191274335729338	45.466043857158986	0
1	ChIJoUEJQq7GhkcRI153LB6-eXY	3	1	9.191234014151439	45.466052366449944	2	9.19141048981504	45.466106058364375	0
1	ChIJoUEJQq7GhkcRI153LB6-eXY	3	1	9.191234014151439	45.466052366449944	2	9.190950887302339	45.46574724798585	0
1	ChIJoUEJQq7GhkcRI153LB6-eXY	3	1	9.191234014151439	45.466052366449944	2	9.191349479311711	45.46593589039601	11
1	ChIJoUEJQq7GhkcRI153LB6-eXY	3	1	9.191234014151439	45.466052366449944	2	9.1914690898334	45.46599490232614	15
1	ChIJoUEJQq7GhkcRI153LB6-eXY	3	1	9.191234014151439	45.466052366449944	2	9.190932433187795	45.46585969055422	0
1	ChIJoUEJQq7GhkcRI153LB6-eXY	3	1	9.191234014151439	45.466052366449944	2	9.191112793750117	45.46656968384489	0
1	ChIJoUEJQq7GhkcRI153LB6-eXY	3	1	9.191234014151439	45.466052366449944	2	9.191148879552244	45.46615158413928	0
1	ChIJoUEJQq7GhkcRI153LB6-eXY	3	1	9.191234014151439	45.466052366449944	3	9.191236662149187	45.46604897920127	0
1	ChIJoUEJQq7GhkcRI153LB6-eXY	3	1	9.191234014151439	45.466052366449944	3	9.191202258146385	45.46604461229144	0
1	ChIJoUEJQq7GhkcRI153LB6-eXY	3	1	9.191234014151439	45.466052366449944	3	9.191194541288157	45.466069018014814	0
1	ChIJoUEJQq7GhkcRI153LB6-eXY	3	1	9.191234014151439	45.466052366449944	3	9.191193741889913	45.46601752633407	0
1	ChIJoUEJQq7GhkcRI153LB6-eXY	3	1	9.191234014151439	45.466052366449944	3	9.191216463628871	45.466031326751384	0
1	ChIJoUEJQq7GhkcRI153LB6-eXY	3	1	9.191234014151439	45.466052366449944	3	9.19132378238341	45.46601553303956	0
1	ChIJoUEJQq7GhkcRI153LB6-eXY	3	1	9.191234014151439	45.466052366449944	3	9.19125957391839	45.46615923057871	0
1	ChIJoUEJQq7GhkcRI153LB6-eXY	3	1	9.191234014151439	45.466052366449944	3	9.191345191901442	45.46608249150171	0
1	ChIJoUEJQq7GhkcRI153LB6-eXY	3	1	9.191234014151439	45.466052366449944	3	9.19118831228087	45.466144005231975	0
1	ChIJoUEJQq7GhkcRI153LB6-eXY	3	1	9.191234014151439	45.466052366449944	3	9.19123421360004	45.46604985991223	0
1	ChIJoUEJQq7GhkcRI153LB6-eXY	3	2	9.191554499999999	45.46605236689803	0	9.191554499999999	45.46605236689803	0
1	ChIJoUEJQq7GhkcRI153LB6-eXY	3	2	9.191554499999999	45.46605236689803	0	9.191554499999999	45.46605236689803	0
1	ChIJoUEJQq7GhkcRI153LB6-eXY	3	2	9.191554499999999	45.46605236689803	0	9.191554499999999	45.46605236689803	0
1	ChIJoUEJQq7GhkcRI153LB6-eXY	3	2	9.191554499999999	45.46605236689803	0	9.191554499999999	45.46605236689803	0
1	ChIJoUEJQq7GhkcRI153LB6-eXY	3	2	9.191554499999999	45.46605236689803	0	9.191554499999999	45.46605236689803	0
1	ChIJoUEJQq7GhkcRI153LB6-eXY	3	2	9.191554499999999	45.46605236689803	0	9.191554499999999	45.46605236689803	0
1	ChIJoUEJQq7GhkcRI153LB6-eXY	3	2	9.191554499999999	45.46605236689803	0	9.191554499999999	45.46605236689803	0
1	ChIJoUEJQq7GhkcRI153LB6-eXY	3	2	9.191554499999999	45.46605236689803	0	9.191554499999999	45.46605236689803	0
1	ChIJoUEJQq7GhkcRI153LB6-eXY	3	2	9.191554499999999	45.46605236689803	0	9.191554499999999	45.46605236689803	0
1	ChIJoUEJQq7GhkcRI153LB6-eXY	3	2	9.191554499999999	45.46605236689803	0	9.191554499999999	45.46605236689803	0
1	ChIJoUEJQq7GhkcRI153LB6-eXY	3	2	9.191554499999999	45.46605236689803	1	9.191571710852198	45.46605138757826	0
1	ChIJoUEJQq7GhkcRI153LB6-eXY	3	2	9.191554499999999	45.46605236689803	1	9.191562937061128	45.46605476106248	0
1	ChIJoUEJQq7GhkcRI153LB6-eXY	3	2	9.191554499999999	45.46605236689803	1	9.191560571048937	45.46605937527069	0
1	ChIJoUEJQq7GhkcRI153LB6-eXY	3	2	9.191554499999999	45.46605236689803	1	9.191556601076641	45.466074829638245	0
1	ChIJoUEJQq7GhkcRI153LB6-eXY	3	2	9.191554499999999	45.46605236689803	1	9.191559661575793	45.466054228782184	0
1	ChIJoUEJQq7GhkcRI153LB6-eXY	3	2	9.191554499999999	45.46605236689803	1	9.191551685711556	45.466055782993806	0
1	ChIJoUEJQq7GhkcRI153LB6-eXY	3	2	9.191554499999999	45.46605236689803	1	9.191545275446154	45.46604464751145	0
1	ChIJoUEJQq7GhkcRI153LB6-eXY	3	2	9.191554499999999	45.46605236689803	1	9.191545497483819	45.46603413387666	16
1	ChIJoUEJQq7GhkcRI153LB6-eXY	3	2	9.191554499999999	45.46605236689803	1	9.191563973064369	45.46606026495642	0
1	ChIJoUEJQq7GhkcRI153LB6-eXY	3	2	9.191554499999999	45.46605236689803	1	9.191554340208995	45.46605861742706	0
1	ChIJoUEJQq7GhkcRI153LB6-eXY	3	2	9.191554499999999	45.46605236689803	2	9.191859217158173	45.46578023813045	12
1	ChIJoUEJQq7GhkcRI153LB6-eXY	3	2	9.191554499999999	45.46605236689803	2	9.190795349778167	45.46615505295259	0
1	ChIJoUEJQq7GhkcRI153LB6-eXY	3	2	9.191554499999999	45.46605236689803	2	9.192339765194415	45.46626292556411	0
1	ChIJoUEJQq7GhkcRI153LB6-eXY	3	2	9.191554499999999	45.46605236689803	2	9.191705308633473	45.4658984690292	14
1	ChIJoUEJQq7GhkcRI153LB6-eXY	3	2	9.191554499999999	45.46605236689803	2	9.191501018655273	45.466200468164395	0
1	ChIJoUEJQq7GhkcRI153LB6-eXY	3	2	9.191554499999999	45.46605236689803	2	9.191922801064011	45.46608842522194	0
1	ChIJoUEJQq7GhkcRI153LB6-eXY	3	2	9.191554499999999	45.46605236689803	2	9.191067907297631	45.465565683458344	0
1	ChIJoUEJQq7GhkcRI153LB6-eXY	3	2	9.191554499999999	45.46605236689803	2	9.191750299137007	45.46588825066768	19
1	ChIJoUEJQq7GhkcRI153LB6-eXY	3	2	9.191554499999999	45.46605236689803	2	9.19081725235498	45.466211359098	0
1	ChIJoUEJQq7GhkcRI153LB6-eXY	3	2	9.191554499999999	45.46605236689803	2	9.191383821402324	45.46621564049767	0
1	ChIJoUEJQq7GhkcRI153LB6-eXY	3	2	9.191554499999999	45.46605236689803	3	9.191596648672538	45.46603422340712	0
1	ChIJoUEJQq7GhkcRI153LB6-eXY	3	2	9.191554499999999	45.46605236689803	3	9.191555857537939	45.466088969593315	0
1	ChIJoUEJQq7GhkcRI153LB6-eXY	3	2	9.191554499999999	45.46605236689803	3	9.191497042678302	45.466036901148435	0
1	ChIJoUEJQq7GhkcRI153LB6-eXY	3	2	9.191554499999999	45.46605236689803	3	9.191611742180935	45.466000971965606	15
1	ChIJoUEJQq7GhkcRI153LB6-eXY	3	2	9.191554499999999	45.46605236689803	3	9.191500704881085	45.46601672146324	15
1	ChIJoUEJQq7GhkcRI153LB6-eXY	3	2	9.191554499999999	45.46605236689803	3	9.191540607924281	45.46608218293185	0
1	ChIJoUEJQq7GhkcRI153LB6-eXY	3	2	9.191554499999999	45.46605236689803	3	9.191540277093699	45.46607576830353	0
1	ChIJoUEJQq7GhkcRI153LB6-eXY	3	2	9.191554499999999	45.46605236689803	3	9.191527643168921	45.465997988737094	15
1	ChIJoUEJQq7GhkcRI153LB6-eXY	3	2	9.191554499999999	45.46605236689803	3	9.191584023438175	45.465943474469086	11
1	ChIJoUEJQq7GhkcRI153LB6-eXY	3	2	9.191554499999999	45.46605236689803	3	9.191552454698924	45.46605495172484	0
1	ChIJoUEJQq7GhkcRI153LB6-eXY	3	3	9.19187498584856	45.466052366449944	0	9.19187498584856	45.466052366449944	0
1	ChIJoUEJQq7GhkcRI153LB6-eXY	3	3	9.19187498584856	45.466052366449944	0	9.19187498584856	45.466052366449944	0
1	ChIJoUEJQq7GhkcRI153LB6-eXY	3	3	9.19187498584856	45.466052366449944	0	9.19187498584856	45.466052366449944	0
1	ChIJoUEJQq7GhkcRI153LB6-eXY	3	3	9.19187498584856	45.466052366449944	0	9.19187498584856	45.466052366449944	0
1	ChIJoUEJQq7GhkcRI153LB6-eXY	3	3	9.19187498584856	45.466052366449944	0	9.19187498584856	45.466052366449944	0
1	ChIJoUEJQq7GhkcRI153LB6-eXY	3	3	9.19187498584856	45.466052366449944	0	9.19187498584856	45.466052366449944	0
1	ChIJoUEJQq7GhkcRI153LB6-eXY	3	3	9.19187498584856	45.466052366449944	0	9.19187498584856	45.466052366449944	0
1	ChIJoUEJQq7GhkcRI153LB6-eXY	3	3	9.19187498584856	45.466052366449944	0	9.19187498584856	45.466052366449944	0
1	ChIJoUEJQq7GhkcRI153LB6-eXY	3	3	9.19187498584856	45.466052366449944	0	9.19187498584856	45.466052366449944	0
1	ChIJoUEJQq7GhkcRI153LB6-eXY	3	3	9.19187498584856	45.466052366449944	0	9.19187498584856	45.466052366449944	0
1	ChIJoUEJQq7GhkcRI153LB6-eXY	3	3	9.19187498584856	45.466052366449944	1	9.19187604487912	45.46606444512014	0
1	ChIJoUEJQq7GhkcRI153LB6-eXY	3	3	9.19187498584856	45.466052366449944	1	9.19186065219469	45.466036769986225	0
1	ChIJoUEJQq7GhkcRI153LB6-eXY	3	3	9.19187498584856	45.466052366449944	1	9.191875734558655	45.46605165348942	0
1	ChIJoUEJQq7GhkcRI153LB6-eXY	3	3	9.19187498584856	45.466052366449944	1	9.191872962547341	45.46606452619862	0
1	ChIJoUEJQq7GhkcRI153LB6-eXY	3	3	9.19187498584856	45.466052366449944	1	9.191869874324674	45.46604574684273	0
1	ChIJoUEJQq7GhkcRI153LB6-eXY	3	3	9.19187498584856	45.466052366449944	1	9.191853245619768	45.466086252973916	0
1	ChIJoUEJQq7GhkcRI153LB6-eXY	3	3	9.19187498584856	45.466052366449944	1	9.191909840092455	45.46606193427699	0
1	ChIJoUEJQq7GhkcRI153LB6-eXY	3	3	9.19187498584856	45.466052366449944	1	9.19185773334166	45.466087300909834	0
1	ChIJoUEJQq7GhkcRI153LB6-eXY	3	3	9.19187498584856	45.466052366449944	1	9.191897840284538	45.46607891355045	0
1	ChIJoUEJQq7GhkcRI153LB6-eXY	3	3	9.19187498584856	45.466052366449944	1	9.191882123395903	45.46604529354492	0
1	ChIJoUEJQq7GhkcRI153LB6-eXY	3	3	9.19187498584856	45.466052366449944	2	9.191560843467904	45.46599735021675	15
1	ChIJoUEJQq7GhkcRI153LB6-eXY	3	3	9.19187498584856	45.466052366449944	2	9.191867420719738	45.46605235098621	0
1	ChIJoUEJQq7GhkcRI153LB6-eXY	3	3	9.19187498584856	45.466052366449944	2	9.191911209078064	45.46604470494349	0
1	ChIJoUEJQq7GhkcRI153LB6-eXY	3	3	9.19187498584856	45.466052366449944	2	9.191852465629582	45.46596490844751	0
1	ChIJoUEJQq7GhkcRI153LB6-eXY	3	3	9.19187498584856	45.466052366449944	2	9.192106046148844	45.46639982863494	0
1	ChIJoUEJQq7GhkcRI153LB6-eXY	3	3	9.19187498584856	45.466052366449944	2	9.191878888066976	45.46602756479787	0
1	ChIJoUEJQq7GhkcRI153LB6-eXY	3	3	9.19187498584856	45.466052366449944	2	9.19179939300811	45.4660757023255	0
1	ChIJoUEJQq7GhkcRI153LB6-eXY	3	3	9.19187498584856	45.466052366449944	2	9.191458902570862	45.46581790629633	3
1	ChIJoUEJQq7GhkcRI153LB6-eXY	3	3	9.19187498584856	45.466052366449944	2	9.19183411828262	45.466068181471044	0
1	ChIJoUEJQq7GhkcRI153LB6-eXY	3	3	9.19187498584856	45.466052366449944	2	9.191990638552044	45.46607846955125	0
1	ChIJoUEJQq7GhkcRI153LB6-eXY	3	3	9.19187498584856	45.466052366449944	3	9.191846943574207	45.466048838255496	0
1	ChIJoUEJQq7GhkcRI153LB6-eXY	3	3	9.19187498584856	45.466052366449944	3	9.191772782431444	45.466102166768344	0
1	ChIJoUEJQq7GhkcRI153LB6-eXY	3	3	9.19187498584856	45.466052366449944	3	9.191896127422552	45.46606138498226	0
1	ChIJoUEJQq7GhkcRI153LB6-eXY	3	3	9.19187498584856	45.466052366449944	3	9.191893353668046	45.466004190876376	0
1	ChIJoUEJQq7GhkcRI153LB6-eXY	3	3	9.19187498584856	45.466052366449944	3	9.191944925809027	45.466031713121176	0
1	ChIJoUEJQq7GhkcRI153LB6-eXY	3	3	9.19187498584856	45.466052366449944	3	9.191925224313017	45.4660625795056	0
1	ChIJoUEJQq7GhkcRI153LB6-eXY	3	3	9.19187498584856	45.466052366449944	3	9.191975307796271	45.46604110490856	0
1	ChIJoUEJQq7GhkcRI153LB6-eXY	3	3	9.19187498584856	45.466052366449944	3	9.191881404445216	45.46603955818982	0
1	ChIJoUEJQq7GhkcRI153LB6-eXY	3	3	9.19187498584856	45.466052366449944	3	9.191871439968702	45.46605126879077	0
1	ChIJoUEJQq7GhkcRI153LB6-eXY	3	3	9.19187498584856	45.466052366449944	3	9.192009310207432	45.46598413221069	0
1	ChIJoUEJQq7GhkcRI153LB6-eXY	3	4	9.191234015429293	45.465827599551915	0	9.191234015429293	45.465827599551915	16
1	ChIJoUEJQq7GhkcRI153LB6-eXY	3	4	9.191234015429293	45.465827599551915	0	9.191234015429293	45.465827599551915	16
1	ChIJoUEJQq7GhkcRI153LB6-eXY	3	4	9.191234015429293	45.465827599551915	0	9.191234015429293	45.465827599551915	16
1	ChIJoUEJQq7GhkcRI153LB6-eXY	3	4	9.191234015429293	45.465827599551915	0	9.191234015429293	45.465827599551915	16
1	ChIJoUEJQq7GhkcRI153LB6-eXY	3	4	9.191234015429293	45.465827599551915	0	9.191234015429293	45.465827599551915	16
1	ChIJoUEJQq7GhkcRI153LB6-eXY	3	4	9.191234015429293	45.465827599551915	0	9.191234015429293	45.465827599551915	16
1	ChIJoUEJQq7GhkcRI153LB6-eXY	3	4	9.191234015429293	45.465827599551915	0	9.191234015429293	45.465827599551915	16
1	ChIJoUEJQq7GhkcRI153LB6-eXY	3	4	9.191234015429293	45.465827599551915	0	9.191234015429293	45.465827599551915	16
1	ChIJoUEJQq7GhkcRI153LB6-eXY	3	4	9.191234015429293	45.465827599551915	0	9.191234015429293	45.465827599551915	16
1	ChIJoUEJQq7GhkcRI153LB6-eXY	3	4	9.191234015429293	45.465827599551915	0	9.191234015429293	45.465827599551915	16
1	ChIJoUEJQq7GhkcRI153LB6-eXY	3	4	9.191234015429293	45.465827599551915	1	9.191235034159991	45.46585011388414	16
1	ChIJoUEJQq7GhkcRI153LB6-eXY	3	4	9.191234015429293	45.465827599551915	1	9.191229252145046	45.46581493460284	16
1	ChIJoUEJQq7GhkcRI153LB6-eXY	3	4	9.191234015429293	45.465827599551915	1	9.191244407057779	45.46584070569619	16
1	ChIJoUEJQq7GhkcRI153LB6-eXY	3	4	9.191234015429293	45.465827599551915	1	9.191243432150053	45.46582036944609	16
1	ChIJoUEJQq7GhkcRI153LB6-eXY	3	4	9.191234015429293	45.465827599551915	1	9.191232192184499	45.46582715092223	16
1	ChIJoUEJQq7GhkcRI153LB6-eXY	3	4	9.191234015429293	45.465827599551915	1	9.19119946417195	45.4658220421221	17
1	ChIJoUEJQq7GhkcRI153LB6-eXY	3	4	9.191234015429293	45.465827599551915	1	9.191243057889023	45.465836674847075	16
1	ChIJoUEJQq7GhkcRI153LB6-eXY	3	4	9.191234015429293	45.465827599551915	1	9.191233057469441	45.46582579250823	16
1	ChIJoUEJQq7GhkcRI153LB6-eXY	3	4	9.191234015429293	45.465827599551915	1	9.191231803929115	45.46582863725237	16
1	ChIJoUEJQq7GhkcRI153LB6-eXY	3	4	9.191234015429293	45.465827599551915	1	9.191235081581095	45.46582492087379	16
1	ChIJoUEJQq7GhkcRI153LB6-eXY	3	4	9.191234015429293	45.465827599551915	2	9.191210544969504	45.46572487745836	19
1	ChIJoUEJQq7GhkcRI153LB6-eXY	3	4	9.191234015429293	45.465827599551915	2	9.191623594003659	45.465677755499875	7
1	ChIJoUEJQq7GhkcRI153LB6-eXY	3	4	9.191234015429293	45.465827599551915	2	9.191152676806293	45.46587182904503	0
1	ChIJoUEJQq7GhkcRI153LB6-eXY	3	4	9.191234015429293	45.465827599551915	2	9.190787107530406	45.46583622883011	0
1	ChIJoUEJQq7GhkcRI153LB6-eXY	3	4	9.191234015429293	45.465827599551915	2	9.191290443226613	45.46582239572131	14
1	ChIJoUEJQq7GhkcRI153LB6-eXY	3	4	9.191234015429293	45.465827599551915	2	9.191022651329751	45.46586590842221	0
1	ChIJoUEJQq7GhkcRI153LB6-eXY	3	4	9.191234015429293	45.465827599551915	2	9.191436003701728	45.46634076916	0
1	ChIJoUEJQq7GhkcRI153LB6-eXY	3	4	9.191234015429293	45.465827599551915	2	9.190901293162856	45.46515607013145	0
1	ChIJoUEJQq7GhkcRI153LB6-eXY	3	4	9.191234015429293	45.465827599551915	2	9.191300680475646	45.46586844618969	12
1	ChIJoUEJQq7GhkcRI153LB6-eXY	3	4	9.191234015429293	45.465827599551915	2	9.191240894193346	45.4658609271943	16
1	ChIJoUEJQq7GhkcRI153LB6-eXY	3	4	9.191234015429293	45.465827599551915	3	9.191332470413426	45.465788780538716	13
1	ChIJoUEJQq7GhkcRI153LB6-eXY	3	4	9.191234015429293	45.465827599551915	3	9.191337636555343	45.46587264261573	10
1	ChIJoUEJQq7GhkcRI153LB6-eXY	3	4	9.191234015429293	45.465827599551915	3	9.191237291127162	45.46583043471139	16
1	ChIJoUEJQq7GhkcRI153LB6-eXY	3	4	9.191234015429293	45.465827599551915	3	9.191274149204293	45.46591154902094	15
1	ChIJoUEJQq7GhkcRI153LB6-eXY	3	4	9.191234015429293	45.465827599551915	3	9.191214933125671	45.46583423370759	16
1	ChIJoUEJQq7GhkcRI153LB6-eXY	3	4	9.191234015429293	45.465827599551915	3	9.191283425133225	45.46574022454401	16
1	ChIJoUEJQq7GhkcRI153LB6-eXY	3	4	9.191234015429293	45.465827599551915	3	9.191218634358885	45.46583709456976	16
1	ChIJoUEJQq7GhkcRI153LB6-eXY	3	4	9.191234015429293	45.465827599551915	3	9.19120208694952	45.465840236691214	17
1	ChIJoUEJQq7GhkcRI153LB6-eXY	3	4	9.191234015429293	45.465827599551915	3	9.191334274272897	45.46583682256749	10
1	ChIJoUEJQq7GhkcRI153LB6-eXY	3	4	9.191234015429293	45.465827599551915	3	9.191207848816974	45.46587979912641	18
1	ChIJoUEJQq7GhkcRI153LB6-eXY	3	5	9.191554499999999	45.4658276	0	9.191554499999999	45.4658276	1
1	ChIJoUEJQq7GhkcRI153LB6-eXY	3	5	9.191554499999999	45.4658276	0	9.191554499999999	45.4658276	1
1	ChIJoUEJQq7GhkcRI153LB6-eXY	3	5	9.191554499999999	45.4658276	0	9.191554499999999	45.4658276	1
1	ChIJoUEJQq7GhkcRI153LB6-eXY	3	5	9.191554499999999	45.4658276	0	9.191554499999999	45.4658276	1
1	ChIJoUEJQq7GhkcRI153LB6-eXY	3	5	9.191554499999999	45.4658276	0	9.191554499999999	45.4658276	1
1	ChIJoUEJQq7GhkcRI153LB6-eXY	3	5	9.191554499999999	45.4658276	0	9.191554499999999	45.4658276	1
1	ChIJoUEJQq7GhkcRI153LB6-eXY	3	5	9.191554499999999	45.4658276	0	9.191554499999999	45.4658276	1
1	ChIJoUEJQq7GhkcRI153LB6-eXY	3	5	9.191554499999999	45.4658276	0	9.191554499999999	45.4658276	1
1	ChIJoUEJQq7GhkcRI153LB6-eXY	3	5	9.191554499999999	45.4658276	0	9.191554499999999	45.4658276	1
1	ChIJoUEJQq7GhkcRI153LB6-eXY	3	5	9.191554499999999	45.4658276	0	9.191554499999999	45.4658276	1
1	ChIJoUEJQq7GhkcRI153LB6-eXY	3	5	9.191554499999999	45.4658276	1	9.191555294504909	45.46583406390203	1
1	ChIJoUEJQq7GhkcRI153LB6-eXY	3	5	9.191554499999999	45.4658276	1	9.191515689281895	45.46583767783771	3
1	ChIJoUEJQq7GhkcRI153LB6-eXY	3	5	9.191554499999999	45.4658276	1	9.19156368586285	45.465831057074574	1
1	ChIJoUEJQq7GhkcRI153LB6-eXY	3	5	9.191554499999999	45.4658276	1	9.191543345908554	45.4658314567881	1
1	ChIJoUEJQq7GhkcRI153LB6-eXY	3	5	9.191554499999999	45.4658276	1	9.191566357119102	45.46582584582168	1
1	ChIJoUEJQq7GhkcRI153LB6-eXY	3	5	9.191554499999999	45.4658276	1	9.191587907047879	45.46582466342275	1
1	ChIJoUEJQq7GhkcRI153LB6-eXY	3	5	9.191554499999999	45.4658276	1	9.191544775079256	45.46581735233364	1
1	ChIJoUEJQq7GhkcRI153LB6-eXY	3	5	9.191554499999999	45.4658276	1	9.191538702018189	45.465826774079126	1
1	ChIJoUEJQq7GhkcRI153LB6-eXY	3	5	9.191554499999999	45.4658276	1	9.191554090722681	45.465826594759235	1
1	ChIJoUEJQq7GhkcRI153LB6-eXY	3	5	9.191554499999999	45.4658276	1	9.191573795221037	45.46583382900146	1
1	ChIJoUEJQq7GhkcRI153LB6-eXY	3	5	9.191554499999999	45.4658276	2	9.191185693303694	45.46553219223147	0
1	ChIJoUEJQq7GhkcRI153LB6-eXY	3	5	9.191554499999999	45.4658276	2	9.191715632986298	45.46597836073606	0
1	ChIJoUEJQq7GhkcRI153LB6-eXY	3	5	9.191554499999999	45.4658276	2	9.191816364028636	45.46583108565441	18
1	ChIJoUEJQq7GhkcRI153LB6-eXY	3	5	9.191554499999999	45.4658276	2	9.19176546663318	45.46537571553532	0
1	ChIJoUEJQq7GhkcRI153LB6-eXY	3	5	9.191554499999999	45.4658276	2	9.19113461641948	45.46629568250078	0
1	ChIJoUEJQq7GhkcRI153LB6-eXY	3	5	9.191554499999999	45.4658276	2	9.19135957927281	45.46597583408831	20
1	ChIJoUEJQq7GhkcRI153LB6-eXY	3	5	9.191554499999999	45.4658276	2	9.191442717661143	45.46579360838146	4
1	ChIJoUEJQq7GhkcRI153LB6-eXY	3	5	9.191554499999999	45.4658276	2	9.191221855530381	45.465849138582385	16
1	ChIJoUEJQq7GhkcRI153LB6-eXY	3	5	9.191554499999999	45.4658276	2	9.191596415196882	45.46573668425829	5
1	ChIJoUEJQq7GhkcRI153LB6-eXY	3	5	9.191554499999999	45.4658276	2	9.191746814140503	45.465340038448076	0
1	ChIJoUEJQq7GhkcRI153LB6-eXY	3	5	9.191554499999999	45.4658276	3	9.191597866115872	45.465896931736715	9
1	ChIJoUEJQq7GhkcRI153LB6-eXY	3	5	9.191554499999999	45.4658276	3	9.191525949633894	45.46581457099184	1
1	ChIJoUEJQq7GhkcRI153LB6-eXY	3	5	9.191554499999999	45.4658276	3	9.191512458623361	45.465826462491165	3
1	ChIJoUEJQq7GhkcRI153LB6-eXY	3	5	9.191554499999999	45.4658276	3	9.191399499365495	45.46577155410823	6
1	ChIJoUEJQq7GhkcRI153LB6-eXY	3	5	9.191554499999999	45.4658276	3	9.191506946729469	45.4658276671626	3
1	ChIJoUEJQq7GhkcRI153LB6-eXY	3	5	9.191554499999999	45.4658276	3	9.191469568394497	45.46588769320802	4
1	ChIJoUEJQq7GhkcRI153LB6-eXY	3	5	9.191554499999999	45.4658276	3	9.1915707046274	45.46590993565698	9
1	ChIJoUEJQq7GhkcRI153LB6-eXY	3	5	9.191554499999999	45.4658276	3	9.191572252768886	45.46578345211968	1
1	ChIJoUEJQq7GhkcRI153LB6-eXY	3	5	9.191554499999999	45.4658276	3	9.191554522141153	45.465799668377414	1
1	ChIJoUEJQq7GhkcRI153LB6-eXY	3	5	9.191554499999999	45.4658276	3	9.19149124898624	45.465817015634194	3
1	ChIJoUEJQq7GhkcRI153LB6-eXY	3	6	9.191874984570706	45.465827599551915	0	9.191874984570706	45.465827599551915	19
1	ChIJoUEJQq7GhkcRI153LB6-eXY	3	6	9.191874984570706	45.465827599551915	0	9.191874984570706	45.465827599551915	19
1	ChIJoUEJQq7GhkcRI153LB6-eXY	3	6	9.191874984570706	45.465827599551915	0	9.191874984570706	45.465827599551915	19
1	ChIJoUEJQq7GhkcRI153LB6-eXY	3	6	9.191874984570706	45.465827599551915	0	9.191874984570706	45.465827599551915	19
1	ChIJoUEJQq7GhkcRI153LB6-eXY	3	6	9.191874984570706	45.465827599551915	0	9.191874984570706	45.465827599551915	19
1	ChIJoUEJQq7GhkcRI153LB6-eXY	3	6	9.191874984570706	45.465827599551915	0	9.191874984570706	45.465827599551915	19
1	ChIJoUEJQq7GhkcRI153LB6-eXY	3	6	9.191874984570706	45.465827599551915	0	9.191874984570706	45.465827599551915	19
1	ChIJoUEJQq7GhkcRI153LB6-eXY	3	6	9.191874984570706	45.465827599551915	0	9.191874984570706	45.465827599551915	19
1	ChIJoUEJQq7GhkcRI153LB6-eXY	3	6	9.191874984570706	45.465827599551915	0	9.191874984570706	45.465827599551915	19
1	ChIJoUEJQq7GhkcRI153LB6-eXY	3	6	9.191874984570706	45.465827599551915	0	9.191874984570706	45.465827599551915	19
1	ChIJoUEJQq7GhkcRI153LB6-eXY	3	6	9.191874984570706	45.465827599551915	1	9.191860856543824	45.46583578836582	19
1	ChIJoUEJQq7GhkcRI153LB6-eXY	3	6	9.191874984570706	45.465827599551915	1	9.191881132399319	45.46583263739824	19
1	ChIJoUEJQq7GhkcRI153LB6-eXY	3	6	9.191874984570706	45.465827599551915	1	9.19188831166753	45.46582431346326	20
1	ChIJoUEJQq7GhkcRI153LB6-eXY	3	6	9.191874984570706	45.465827599551915	1	9.191876667461493	45.46582168817202	18
1	ChIJoUEJQq7GhkcRI153LB6-eXY	3	6	9.191874984570706	45.465827599551915	1	9.191887999145909	45.46583457523675	20
1	ChIJoUEJQq7GhkcRI153LB6-eXY	3	6	9.191874984570706	45.465827599551915	1	9.191851345064022	45.465831710864045	19
1	ChIJoUEJQq7GhkcRI153LB6-eXY	3	6	9.191874984570706	45.465827599551915	1	9.191857955564585	45.465839228824905	19
1	ChIJoUEJQq7GhkcRI153LB6-eXY	3	6	9.191874984570706	45.465827599551915	1	9.191880263258856	45.46583766770613	19
1	ChIJoUEJQq7GhkcRI153LB6-eXY	3	6	9.191874984570706	45.465827599551915	1	9.191868112835133	45.46582743302681	19
1	ChIJoUEJQq7GhkcRI153LB6-eXY	3	6	9.191874984570706	45.465827599551915	1	9.191877401641843	45.465827758525364	19
1	ChIJoUEJQq7GhkcRI153LB6-eXY	3	6	9.191874984570706	45.465827599551915	2	9.191752453558886	45.46586584348838	19
1	ChIJoUEJQq7GhkcRI153LB6-eXY	3	6	9.191874984570706	45.465827599551915	2	9.192160893103683	45.465809838782846	0
1	ChIJoUEJQq7GhkcRI153LB6-eXY	3	6	9.191874984570706	45.465827599551915	2	9.19191693878374	45.46558873205449	0
1	ChIJoUEJQq7GhkcRI153LB6-eXY	3	6	9.191874984570706	45.465827599551915	2	9.191848467721256	45.465756330096255	13
1	ChIJoUEJQq7GhkcRI153LB6-eXY	3	6	9.191874984570706	45.465827599551915	2	9.191875974959549	45.46582780699121	19
1	ChIJoUEJQq7GhkcRI153LB6-eXY	3	6	9.191874984570706	45.465827599551915	2	9.19180094811351	45.46587386638625	20
1	ChIJoUEJQq7GhkcRI153LB6-eXY	3	6	9.191874984570706	45.465827599551915	2	9.191953216436938	45.465894752992334	0
1	ChIJoUEJQq7GhkcRI153LB6-eXY	3	6	9.191874984570706	45.465827599551915	2	9.191990952206321	45.46573730391517	0
1	ChIJoUEJQq7GhkcRI153LB6-eXY	3	6	9.191874984570706	45.465827599551915	2	9.191744190968837	45.46574201459871	6
1	ChIJoUEJQq7GhkcRI153LB6-eXY	3	6	9.191874984570706	45.465827599551915	2	9.191814055170388	45.46581029503834	17
1	ChIJoUEJQq7GhkcRI153LB6-eXY	3	6	9.191874984570706	45.465827599551915	3	9.191943909811002	45.46582455243278	0
1	ChIJoUEJQq7GhkcRI153LB6-eXY	3	6	9.191874984570706	45.465827599551915	3	9.192015309730325	45.46579031639197	0
1	ChIJoUEJQq7GhkcRI153LB6-eXY	3	6	9.191874984570706	45.465827599551915	3	9.1919012312025	45.46576676929787	17
1	ChIJoUEJQq7GhkcRI153LB6-eXY	3	6	9.191874984570706	45.465827599551915	3	9.191843858069431	45.46582525371205	18
1	ChIJoUEJQq7GhkcRI153LB6-eXY	3	6	9.191874984570706	45.465827599551915	3	9.191883293216309	45.46580165851384	20
1	ChIJoUEJQq7GhkcRI153LB6-eXY	3	6	9.191874984570706	45.465827599551915	3	9.191909831611161	45.46585157717483	0
1	ChIJoUEJQq7GhkcRI153LB6-eXY	3	6	9.191874984570706	45.465827599551915	3	9.191773215579444	45.465798258369006	12
1	ChIJoUEJQq7GhkcRI153LB6-eXY	3	6	9.191874984570706	45.465827599551915	3	9.191833603398283	45.46590624334201	20
1	ChIJoUEJQq7GhkcRI153LB6-eXY	3	6	9.191874984570706	45.465827599551915	3	9.191784459868684	45.46577033516677	11
1	ChIJoUEJQq7GhkcRI153LB6-eXY	3	6	9.191874984570706	45.465827599551915	3	9.191842308661116	45.46583011880407	18
1	ChIJoUEJQq7GhkcRI153LB6-eXY	3	7	9.191234016707133	45.465602832653865	0	9.191234016707133	45.465602832653865	20
1	ChIJoUEJQq7GhkcRI153LB6-eXY	3	7	9.191234016707133	45.465602832653865	0	9.191234016707133	45.465602832653865	20
1	ChIJoUEJQq7GhkcRI153LB6-eXY	3	7	9.191234016707133	45.465602832653865	0	9.191234016707133	45.465602832653865	20
1	ChIJoUEJQq7GhkcRI153LB6-eXY	3	7	9.191234016707133	45.465602832653865	0	9.191234016707133	45.465602832653865	20
1	ChIJoUEJQq7GhkcRI153LB6-eXY	3	7	9.191234016707133	45.465602832653865	0	9.191234016707133	45.465602832653865	20
1	ChIJoUEJQq7GhkcRI153LB6-eXY	3	7	9.191234016707133	45.465602832653865	0	9.191234016707133	45.465602832653865	20
1	ChIJoUEJQq7GhkcRI153LB6-eXY	3	7	9.191234016707133	45.465602832653865	0	9.191234016707133	45.465602832653865	20
1	ChIJoUEJQq7GhkcRI153LB6-eXY	3	7	9.191234016707133	45.465602832653865	0	9.191234016707133	45.465602832653865	20
1	ChIJoUEJQq7GhkcRI153LB6-eXY	3	7	9.191234016707133	45.465602832653865	0	9.191234016707133	45.465602832653865	20
1	ChIJoUEJQq7GhkcRI153LB6-eXY	3	7	9.191234016707133	45.465602832653865	0	9.191234016707133	45.465602832653865	20
1	ChIJoUEJQq7GhkcRI153LB6-eXY	3	7	9.191234016707133	45.465602832653865	1	9.191234324244258	45.4656049400792	20
1	ChIJoUEJQq7GhkcRI153LB6-eXY	3	7	9.191234016707133	45.465602832653865	1	9.19122955223983	45.46559203870835	20
1	ChIJoUEJQq7GhkcRI153LB6-eXY	3	7	9.191234016707133	45.465602832653865	1	9.191232373409319	45.465605992474444	20
1	ChIJoUEJQq7GhkcRI153LB6-eXY	3	7	9.191234016707133	45.465602832653865	1	9.191202377542583	45.465609411758	20
1	ChIJoUEJQq7GhkcRI153LB6-eXY	3	7	9.191234016707133	45.465602832653865	1	9.191237443148973	45.46559599878636	20
1	ChIJoUEJQq7GhkcRI153LB6-eXY	3	7	9.191234016707133	45.465602832653865	1	9.191244052191056	45.465601993680835	20
1	ChIJoUEJQq7GhkcRI153LB6-eXY	3	7	9.191234016707133	45.465602832653865	1	9.191234191047114	45.46559499090656	20
1	ChIJoUEJQq7GhkcRI153LB6-eXY	3	7	9.191234016707133	45.465602832653865	1	9.191225313625198	45.46560339128395	20
1	ChIJoUEJQq7GhkcRI153LB6-eXY	3	7	9.191234016707133	45.465602832653865	1	9.191217096775	45.465592282460705	20
1	ChIJoUEJQq7GhkcRI153LB6-eXY	3	7	9.191234016707133	45.465602832653865	1	9.19124383342171	45.465593147826475	19
1	ChIJoUEJQq7GhkcRI153LB6-eXY	3	7	9.191234016707133	45.465602832653865	2	9.19202020427784	45.46599506720814	0
1	ChIJoUEJQq7GhkcRI153LB6-eXY	3	7	9.191234016707133	45.465602832653865	2	9.190424618706997	45.465941067624634	0
1	ChIJoUEJQq7GhkcRI153LB6-eXY	3	7	9.191234016707133	45.465602832653865	2	9.191499919037472	45.465777715019335	1
1	ChIJoUEJQq7GhkcRI153LB6-eXY	3	7	9.191234016707133	45.465602832653865	2	9.191433627316432	45.46530564489672	0
1	ChIJoUEJQq7GhkcRI153LB6-eXY	3	7	9.191234016707133	45.465602832653865	2	9.191178178960476	45.46557727945401	0
1	ChIJoUEJQq7GhkcRI153LB6-eXY	3	7	9.191234016707133	45.465602832653865	2	9.191304009479449	45.465998555094124	0
1	ChIJoUEJQq7GhkcRI153LB6-eXY	3	7	9.191234016707133	45.465602832653865	2	9.191720986619394	45.46528476080337	0
1	ChIJoUEJQq7GhkcRI153LB6-eXY	3	7	9.191234016707133	45.465602832653865	2	9.192196872411953	45.46568141237253	0
1	ChIJoUEJQq7GhkcRI153LB6-eXY	3	7	9.191234016707133	45.465602832653865	2	9.191010411553892	45.46604767358171	0
1	ChIJoUEJQq7GhkcRI153LB6-eXY	3	7	9.191234016707133	45.465602832653865	2	9.190433509145494	45.46592422326758	0
1	ChIJoUEJQq7GhkcRI153LB6-eXY	3	7	9.191234016707133	45.465602832653865	3	9.191239761609625	45.4656070837274	20
1	ChIJoUEJQq7GhkcRI153LB6-eXY	3	7	9.191234016707133	45.465602832653865	3	9.191352456553703	45.46557248525145	19
1	ChIJoUEJQq7GhkcRI153LB6-eXY	3	7	9.191234016707133	45.465602832653865	3	9.19129152668802	45.46556630052685	18
1	ChIJoUEJQq7GhkcRI153LB6-eXY	3	7	9.191234016707133	45.465602832653865	3	9.191260552671539	45.465720875592126	18
1	ChIJoUEJQq7GhkcRI153LB6-eXY	3	7	9.191234016707133	45.465602832653865	3	9.191206815114896	45.465637739775616	18
1	ChIJoUEJQq7GhkcRI153LB6-eXY	3	7	9.191234016707133	45.465602832653865	3	9.191243755825093	45.46558815947551	19
1	ChIJoUEJQq7GhkcRI153LB6-eXY	3	7	9.191234016707133	45.465602832653865	3	9.191158413679243	45.46552681296542	0
1	ChIJoUEJQq7GhkcRI153LB6-eXY	3	7	9.191234016707133	45.465602832653865	3	9.191231487972278	45.465629964334454	18
1	ChIJoUEJQq7GhkcRI153LB6-eXY	3	7	9.191234016707133	45.465602832653865	3	9.191217267729602	45.46559510926406	20
1	ChIJoUEJQq7GhkcRI153LB6-eXY	3	7	9.191234016707133	45.465602832653865	3	9.19128125843875	45.465626484705474	16
1	ChIJoUEJQq7GhkcRI153LB6-eXY	3	8	9.191554499999999	45.46560283310197	0	9.191554499999999	45.46560283310197	13
1	ChIJoUEJQq7GhkcRI153LB6-eXY	3	8	9.191554499999999	45.46560283310197	0	9.191554499999999	45.46560283310197	13
1	ChIJoUEJQq7GhkcRI153LB6-eXY	3	8	9.191554499999999	45.46560283310197	0	9.191554499999999	45.46560283310197	13
1	ChIJoUEJQq7GhkcRI153LB6-eXY	3	8	9.191554499999999	45.46560283310197	0	9.191554499999999	45.46560283310197	13
1	ChIJoUEJQq7GhkcRI153LB6-eXY	3	8	9.191554499999999	45.46560283310197	0	9.191554499999999	45.46560283310197	13
1	ChIJoUEJQq7GhkcRI153LB6-eXY	3	8	9.191554499999999	45.46560283310197	0	9.191554499999999	45.46560283310197	13
1	ChIJoUEJQq7GhkcRI153LB6-eXY	3	8	9.191554499999999	45.46560283310197	0	9.191554499999999	45.46560283310197	13
1	ChIJoUEJQq7GhkcRI153LB6-eXY	3	8	9.191554499999999	45.46560283310197	0	9.191554499999999	45.46560283310197	13
1	ChIJoUEJQq7GhkcRI153LB6-eXY	3	8	9.191554499999999	45.46560283310197	0	9.191554499999999	45.46560283310197	13
1	ChIJoUEJQq7GhkcRI153LB6-eXY	3	8	9.191554499999999	45.46560283310197	0	9.191554499999999	45.46560283310197	13
1	ChIJoUEJQq7GhkcRI153LB6-eXY	3	8	9.191554499999999	45.46560283310197	1	9.191553208202034	45.46560340038271	13
1	ChIJoUEJQq7GhkcRI153LB6-eXY	3	8	9.191554499999999	45.46560283310197	1	9.191558126858649	45.465599158007514	13
1	ChIJoUEJQq7GhkcRI153LB6-eXY	3	8	9.191554499999999	45.46560283310197	1	9.191539631378356	45.46561547892547	13
1	ChIJoUEJQq7GhkcRI153LB6-eXY	3	8	9.191554499999999	45.46560283310197	1	9.191552177495815	45.46559676115146	13
1	ChIJoUEJQq7GhkcRI153LB6-eXY	3	8	9.191554499999999	45.46560283310197	1	9.191542249920234	45.4656009133703	13
1	ChIJoUEJQq7GhkcRI153LB6-eXY	3	8	9.191554499999999	45.46560283310197	1	9.191569649414845	45.46561498570948	12
1	ChIJoUEJQq7GhkcRI153LB6-eXY	3	8	9.191554499999999	45.46560283310197	1	9.191558723126652	45.46560192555884	13
1	ChIJoUEJQq7GhkcRI153LB6-eXY	3	8	9.191554499999999	45.46560283310197	1	9.19155606304118	45.46559714650133	13
1	ChIJoUEJQq7GhkcRI153LB6-eXY	3	8	9.191554499999999	45.46560283310197	1	9.191560047513974	45.4656020581059	13
1	ChIJoUEJQq7GhkcRI153LB6-eXY	3	8	9.191554499999999	45.46560283310197	1	9.191541548533023	45.465592338852574	13
1	ChIJoUEJQq7GhkcRI153LB6-eXY	3	8	9.191554499999999	45.46560283310197	2	9.19093499632727	45.46610623107944	0
1	ChIJoUEJQq7GhkcRI153LB6-eXY	3	8	9.191554499999999	45.46560283310197	2	9.191381970891584	45.46569958114514	10
1	ChIJoUEJQq7GhkcRI153LB6-eXY	3	8	9.191554499999999	45.46560283310197	2	9.19229053429999	45.46561975270313	0
1	ChIJoUEJQq7GhkcRI153LB6-eXY	3	8	9.191554499999999	45.46560283310197	2	9.191612317353579	45.4655671579258	0
1	ChIJoUEJQq7GhkcRI153LB6-eXY	3	8	9.191554499999999	45.46560283310197	2	9.192097338654772	45.4649469419793	0
1	ChIJoUEJQq7GhkcRI153LB6-eXY	3	8	9.191554499999999	45.46560283310197	2	9.19155760869517	45.46566188734882	8
1	ChIJoUEJQq7GhkcRI153LB6-eXY	3	8	9.191554499999999	45.46560283310197	2	9.191562925373749	45.465603924100655	13
1	ChIJoUEJQq7GhkcRI153LB6-eXY	3	8	9.191554499999999	45.46560283310197	2	9.19141051050256	45.46555608500786	0
1	ChIJoUEJQq7GhkcRI153LB6-eXY	3	8	9.191554499999999	45.46560283310197	2	9.191195249066261	45.46558215518653	0
1	ChIJoUEJQq7GhkcRI153LB6-eXY	3	8	9.191554499999999	45.46560283310197	2	9.191526334631597	45.46579137466493	1
1	ChIJoUEJQq7GhkcRI153LB6-eXY	3	8	9.191554499999999	45.46560283310197	3	9.19153650746408	45.465598703381715	14
1	ChIJoUEJQq7GhkcRI153LB6-eXY	3	8	9.191554499999999	45.46560283310197	3	9.191535042250546	45.46559904806421	14
1	ChIJoUEJQq7GhkcRI153LB6-eXY	3	8	9.191554499999999	45.46560283310197	3	9.19154711381244	45.465599742791355	13
1	ChIJoUEJQq7GhkcRI153LB6-eXY	3	8	9.191554499999999	45.46560283310197	3	9.191416715345555	45.465586243635585	17
1	ChIJoUEJQq7GhkcRI153LB6-eXY	3	8	9.191554499999999	45.46560283310197	3	9.191718046454369	45.46565803113376	13
1	ChIJoUEJQq7GhkcRI153LB6-eXY	3	8	9.191554499999999	45.46560283310197	3	9.19157616765431	45.46561368655657	12
1	ChIJoUEJQq7GhkcRI153LB6-eXY	3	8	9.191554499999999	45.46560283310197	3	9.191519371327153	45.465639278355134	10
1	ChIJoUEJQq7GhkcRI153LB6-eXY	3	8	9.191554499999999	45.46560283310197	3	9.19166991702034	45.46565238404694	12
1	ChIJoUEJQq7GhkcRI153LB6-eXY	3	8	9.191554499999999	45.46560283310197	3	9.191589072056535	45.46560159932722	12
1	ChIJoUEJQq7GhkcRI153LB6-eXY	3	8	9.191554499999999	45.46560283310197	3	9.191525284159466	45.465600514853875	15
1	ChIJoUEJQq7GhkcRI153LB6-eXY	3	9	9.191874983292866	45.465602832653865	0	9.191874983292866	45.465602832653865	0
1	ChIJoUEJQq7GhkcRI153LB6-eXY	3	9	9.191874983292866	45.465602832653865	0	9.191874983292866	45.465602832653865	0
1	ChIJoUEJQq7GhkcRI153LB6-eXY	3	9	9.191874983292866	45.465602832653865	0	9.191874983292866	45.465602832653865	0
1	ChIJoUEJQq7GhkcRI153LB6-eXY	3	9	9.191874983292866	45.465602832653865	0	9.191874983292866	45.465602832653865	0
1	ChIJoUEJQq7GhkcRI153LB6-eXY	3	9	9.191874983292866	45.465602832653865	0	9.191874983292866	45.465602832653865	0
1	ChIJoUEJQq7GhkcRI153LB6-eXY	3	9	9.191874983292866	45.465602832653865	0	9.191874983292866	45.465602832653865	0
1	ChIJoUEJQq7GhkcRI153LB6-eXY	3	9	9.191874983292866	45.465602832653865	0	9.191874983292866	45.465602832653865	0
1	ChIJoUEJQq7GhkcRI153LB6-eXY	3	9	9.191874983292866	45.465602832653865	0	9.191874983292866	45.465602832653865	0
1	ChIJoUEJQq7GhkcRI153LB6-eXY	3	9	9.191874983292866	45.465602832653865	0	9.191874983292866	45.465602832653865	0
1	ChIJoUEJQq7GhkcRI153LB6-eXY	3	9	9.191874983292866	45.465602832653865	0	9.191874983292866	45.465602832653865	0
1	ChIJoUEJQq7GhkcRI153LB6-eXY	3	9	9.191874983292866	45.465602832653865	1	9.1918657449831	45.465609239150666	0
1	ChIJoUEJQq7GhkcRI153LB6-eXY	3	9	9.191874983292866	45.465602832653865	1	9.191865498595137	45.46559715370905	0
1	ChIJoUEJQq7GhkcRI153LB6-eXY	3	9	9.191874983292866	45.465602832653865	1	9.19186934546969	45.465595171758544	0
1	ChIJoUEJQq7GhkcRI153LB6-eXY	3	9	9.191874983292866	45.465602832653865	1	9.191871650849063	45.465611221072315	0
1	ChIJoUEJQq7GhkcRI153LB6-eXY	3	9	9.191874983292866	45.465602832653865	1	9.191873136561668	45.465586694832126	0
1	ChIJoUEJQq7GhkcRI153LB6-eXY	3	9	9.191874983292866	45.465602832653865	1	9.191869715910096	45.46560791075315	0
1	ChIJoUEJQq7GhkcRI153LB6-eXY	3	9	9.191874983292866	45.465602832653865	1	9.191878103080192	45.46559432595128	0
1	ChIJoUEJQq7GhkcRI153LB6-eXY	3	9	9.191874983292866	45.465602832653865	1	9.191896040187602	45.46560463320859	0
1	ChIJoUEJQq7GhkcRI153LB6-eXY	3	9	9.191874983292866	45.465602832653865	1	9.191880826692014	45.46560088372882	0
1	ChIJoUEJQq7GhkcRI153LB6-eXY	3	9	9.191874983292866	45.465602832653865	1	9.191852088987417	45.465594075003324	0
1	ChIJoUEJQq7GhkcRI153LB6-eXY	3	9	9.191874983292866	45.465602832653865	2	9.191648862703547	45.46570730418458	6
1	ChIJoUEJQq7GhkcRI153LB6-eXY	3	9	9.191874983292866	45.465602832653865	2	9.1916529037394	45.46526274449525	0
1	ChIJoUEJQq7GhkcRI153LB6-eXY	3	9	9.191874983292866	45.465602832653865	2	9.191629660041716	45.4660358105793	0
1	ChIJoUEJQq7GhkcRI153LB6-eXY	3	9	9.191874983292866	45.465602832653865	2	9.192039296383191	45.46546529153826	0
1	ChIJoUEJQq7GhkcRI153LB6-eXY	3	9	9.191874983292866	45.465602832653865	2	9.191841105326533	45.46559914535963	0
1	ChIJoUEJQq7GhkcRI153LB6-eXY	3	9	9.191874983292866	45.465602832653865	2	9.19187826037085	45.46510359644839	0
1	ChIJoUEJQq7GhkcRI153LB6-eXY	3	9	9.191874983292866	45.465602832653865	2	9.192507609384634	45.46504967016819	0
1	ChIJoUEJQq7GhkcRI153LB6-eXY	3	9	9.191874983292866	45.465602832653865	2	9.192479860879631	45.465647352221744	0
1	ChIJoUEJQq7GhkcRI153LB6-eXY	3	9	9.191874983292866	45.465602832653865	2	9.191466318007036	45.46561897465963	13
1	ChIJoUEJQq7GhkcRI153LB6-eXY	3	9	9.191874983292866	45.465602832653865	2	9.191729869125037	45.465565137420725	0
1	ChIJoUEJQq7GhkcRI153LB6-eXY	3	9	9.191874983292866	45.465602832653865	3	9.191975806657602	45.46562864782034	0
1	ChIJoUEJQq7GhkcRI153LB6-eXY	3	9	9.191874983292866	45.465602832653865	3	9.191910377758118	45.46562476598276	0
1	ChIJoUEJQq7GhkcRI153LB6-eXY	3	9	9.191874983292866	45.465602832653865	3	9.191914095187197	45.465559056425334	0
1	ChIJoUEJQq7GhkcRI153LB6-eXY	3	9	9.191874983292866	45.465602832653865	3	9.191936006087403	45.46550103840273	0
1	ChIJoUEJQq7GhkcRI153LB6-eXY	3	9	9.191874983292866	45.465602832653865	3	9.191921377315758	45.46552246542639	0
1	ChIJoUEJQq7GhkcRI153LB6-eXY	3	9	9.191874983292866	45.465602832653865	3	9.191859008463265	45.46561306251766	0
1	ChIJoUEJQq7GhkcRI153LB6-eXY	3	9	9.191874983292866	45.465602832653865	3	9.191960774873722	45.46558163472042	0
1	ChIJoUEJQq7GhkcRI153LB6-eXY	3	9	9.191874983292866	45.465602832653865	3	9.191795799139188	45.465630162463036	16
1	ChIJoUEJQq7GhkcRI153LB6-eXY	3	9	9.191874983292866	45.465602832653865	3	9.191801659601822	45.46561346212291	0
1	ChIJoUEJQq7GhkcRI153LB6-eXY	3	9	9.191874983292866	45.465602832653865	3	9.191886116163714	45.46560304530468	0
1	ChIJFww3xX80GQ0RtGF1XxXZEbw	5	1	-9.1451320507526	38.711663766544696	0	-9.1451320507526	38.711663766544696	0
1	ChIJFww3xX80GQ0RtGF1XxXZEbw	5	1	-9.1451320507526	38.711663766544696	0	-9.1451320507526	38.711663766544696	0
1	ChIJFww3xX80GQ0RtGF1XxXZEbw	5	1	-9.1451320507526	38.711663766544696	0	-9.1451320507526	38.711663766544696	0
1	ChIJFww3xX80GQ0RtGF1XxXZEbw	5	1	-9.1451320507526	38.711663766544696	0	-9.1451320507526	38.711663766544696	0
1	ChIJFww3xX80GQ0RtGF1XxXZEbw	5	1	-9.1451320507526	38.711663766544696	0	-9.1451320507526	38.711663766544696	0
1	ChIJFww3xX80GQ0RtGF1XxXZEbw	5	1	-9.1451320507526	38.711663766544696	0	-9.1451320507526	38.711663766544696	0
1	ChIJFww3xX80GQ0RtGF1XxXZEbw	5	1	-9.1451320507526	38.711663766544696	0	-9.1451320507526	38.711663766544696	0
1	ChIJFww3xX80GQ0RtGF1XxXZEbw	5	1	-9.1451320507526	38.711663766544696	0	-9.1451320507526	38.711663766544696	0
1	ChIJFww3xX80GQ0RtGF1XxXZEbw	5	1	-9.1451320507526	38.711663766544696	0	-9.1451320507526	38.711663766544696	0
1	ChIJFww3xX80GQ0RtGF1XxXZEbw	5	1	-9.1451320507526	38.711663766544696	0	-9.1451320507526	38.711663766544696	0
1	ChIJFww3xX80GQ0RtGF1XxXZEbw	5	1	-9.1451320507526	38.711663766544696	1	-9.145132224157976	38.71166835571962	0
1	ChIJFww3xX80GQ0RtGF1XxXZEbw	5	1	-9.1451320507526	38.711663766544696	1	-9.145127077145583	38.711662849127606	0
1	ChIJFww3xX80GQ0RtGF1XxXZEbw	5	1	-9.1451320507526	38.711663766544696	1	-9.145142992067665	38.711664711261285	0
1	ChIJFww3xX80GQ0RtGF1XxXZEbw	5	1	-9.1451320507526	38.711663766544696	1	-9.145117862556933	38.711681250096746	0
1	ChIJFww3xX80GQ0RtGF1XxXZEbw	5	1	-9.1451320507526	38.711663766544696	1	-9.145141751609334	38.7116496889198	0
1	ChIJFww3xX80GQ0RtGF1XxXZEbw	5	1	-9.1451320507526	38.711663766544696	1	-9.145133160974794	38.71166389748544	0
1	ChIJFww3xX80GQ0RtGF1XxXZEbw	5	1	-9.1451320507526	38.711663766544696	1	-9.145116004919505	38.711655412859	0
1	ChIJFww3xX80GQ0RtGF1XxXZEbw	5	1	-9.1451320507526	38.711663766544696	1	-9.145129847258426	38.71167742821152	0
1	ChIJFww3xX80GQ0RtGF1XxXZEbw	5	1	-9.1451320507526	38.711663766544696	1	-9.145131289400055	38.711652894019934	0
1	ChIJFww3xX80GQ0RtGF1XxXZEbw	5	1	-9.1451320507526	38.711663766544696	1	-9.145121071903144	38.7116720626262	0
1	ChIJFww3xX80GQ0RtGF1XxXZEbw	5	1	-9.1451320507526	38.711663766544696	2	-9.145268687389118	38.712078992623645	0
1	ChIJFww3xX80GQ0RtGF1XxXZEbw	5	1	-9.1451320507526	38.711663766544696	2	-9.144873202683057	38.7115412188324	7
1	ChIJFww3xX80GQ0RtGF1XxXZEbw	5	1	-9.1451320507526	38.711663766544696	2	-9.14515551958372	38.71162636989016	0
1	ChIJFww3xX80GQ0RtGF1XxXZEbw	5	1	-9.1451320507526	38.711663766544696	2	-9.145298795053492	38.711681043058945	0
1	ChIJFww3xX80GQ0RtGF1XxXZEbw	5	1	-9.1451320507526	38.711663766544696	2	-9.14462293675006	38.711599200616774	0
1	ChIJFww3xX80GQ0RtGF1XxXZEbw	5	1	-9.1451320507526	38.711663766544696	2	-9.14529570103256	38.71158330347168	0
1	ChIJFww3xX80GQ0RtGF1XxXZEbw	5	1	-9.1451320507526	38.711663766544696	2	-9.144843789844458	38.71111698825411	0
1	ChIJFww3xX80GQ0RtGF1XxXZEbw	5	1	-9.1451320507526	38.711663766544696	2	-9.14517908253246	38.711570241972076	0
1	ChIJFww3xX80GQ0RtGF1XxXZEbw	5	1	-9.1451320507526	38.711663766544696	2	-9.14521455646892	38.71163501998	0
1	ChIJFww3xX80GQ0RtGF1XxXZEbw	5	1	-9.1451320507526	38.711663766544696	2	-9.14492416011632	38.71152149799088	6
1	ChIJFww3xX80GQ0RtGF1XxXZEbw	5	1	-9.1451320507526	38.711663766544696	3	-9.145097993749774	38.711582453184	19
1	ChIJFww3xX80GQ0RtGF1XxXZEbw	5	1	-9.1451320507526	38.711663766544696	3	-9.145162953763622	38.71170791675383	0
1	ChIJFww3xX80GQ0RtGF1XxXZEbw	5	1	-9.1451320507526	38.711663766544696	3	-9.145293692153595	38.711660660152965	0
1	ChIJFww3xX80GQ0RtGF1XxXZEbw	5	1	-9.1451320507526	38.711663766544696	3	-9.145139555707381	38.711749005548135	0
1	ChIJFww3xX80GQ0RtGF1XxXZEbw	5	1	-9.1451320507526	38.711663766544696	3	-9.14510205391517	38.711638818735594	0
1	ChIJFww3xX80GQ0RtGF1XxXZEbw	5	1	-9.1451320507526	38.711663766544696	3	-9.145136725154275	38.711663189534924	0
1	ChIJFww3xX80GQ0RtGF1XxXZEbw	5	1	-9.1451320507526	38.711663766544696	3	-9.145313895207481	38.71165448674591	0
1	ChIJFww3xX80GQ0RtGF1XxXZEbw	5	1	-9.1451320507526	38.711663766544696	3	-9.145013840757722	38.71167940304831	0
1	ChIJFww3xX80GQ0RtGF1XxXZEbw	5	1	-9.1451320507526	38.711663766544696	3	-9.145187986642151	38.71171644100363	0
1	ChIJFww3xX80GQ0RtGF1XxXZEbw	5	1	-9.1451320507526	38.711663766544696	3	-9.14502176664248	38.711569268884524	14
1	ChIJFww3xX80GQ0RtGF1XxXZEbw	5	2	-9.144843999999999	38.711663766898056	0	-9.144843999999999	38.711663766898056	18
1	ChIJFww3xX80GQ0RtGF1XxXZEbw	5	2	-9.144843999999999	38.711663766898056	0	-9.144843999999999	38.711663766898056	18
1	ChIJFww3xX80GQ0RtGF1XxXZEbw	5	2	-9.144843999999999	38.711663766898056	0	-9.144843999999999	38.711663766898056	18
1	ChIJFww3xX80GQ0RtGF1XxXZEbw	5	2	-9.144843999999999	38.711663766898056	0	-9.144843999999999	38.711663766898056	18
1	ChIJFww3xX80GQ0RtGF1XxXZEbw	5	2	-9.144843999999999	38.711663766898056	0	-9.144843999999999	38.711663766898056	18
1	ChIJFww3xX80GQ0RtGF1XxXZEbw	5	2	-9.144843999999999	38.711663766898056	0	-9.144843999999999	38.711663766898056	18
1	ChIJFww3xX80GQ0RtGF1XxXZEbw	5	2	-9.144843999999999	38.711663766898056	0	-9.144843999999999	38.711663766898056	18
1	ChIJFww3xX80GQ0RtGF1XxXZEbw	5	2	-9.144843999999999	38.711663766898056	0	-9.144843999999999	38.711663766898056	18
1	ChIJFww3xX80GQ0RtGF1XxXZEbw	5	2	-9.144843999999999	38.711663766898056	0	-9.144843999999999	38.711663766898056	18
1	ChIJFww3xX80GQ0RtGF1XxXZEbw	5	2	-9.144843999999999	38.711663766898056	0	-9.144843999999999	38.711663766898056	18
1	ChIJFww3xX80GQ0RtGF1XxXZEbw	5	2	-9.144843999999999	38.711663766898056	1	-9.144831383004352	38.71166705612856	19
1	ChIJFww3xX80GQ0RtGF1XxXZEbw	5	2	-9.144843999999999	38.711663766898056	1	-9.144838769982549	38.711661800698074	17
1	ChIJFww3xX80GQ0RtGF1XxXZEbw	5	2	-9.144843999999999	38.711663766898056	1	-9.144827743039475	38.711662250182854	17
1	ChIJFww3xX80GQ0RtGF1XxXZEbw	5	2	-9.144843999999999	38.711663766898056	1	-9.144847304641353	38.711666339562925	18
1	ChIJFww3xX80GQ0RtGF1XxXZEbw	5	2	-9.144843999999999	38.711663766898056	1	-9.144847933642229	38.7116776205772	0
1	ChIJFww3xX80GQ0RtGF1XxXZEbw	5	2	-9.144843999999999	38.711663766898056	1	-9.14482361592674	38.71167262252832	19
1	ChIJFww3xX80GQ0RtGF1XxXZEbw	5	2	-9.144843999999999	38.711663766898056	1	-9.144862334249696	38.711659290989715	16
1	ChIJFww3xX80GQ0RtGF1XxXZEbw	5	2	-9.144843999999999	38.711663766898056	1	-9.144844363712268	38.711660369122654	17
1	ChIJFww3xX80GQ0RtGF1XxXZEbw	5	2	-9.144843999999999	38.711663766898056	1	-9.144835593286519	38.71167318489052	0
1	ChIJFww3xX80GQ0RtGF1XxXZEbw	5	2	-9.144843999999999	38.711663766898056	1	-9.144851633221421	38.711649537788	15
1	ChIJFww3xX80GQ0RtGF1XxXZEbw	5	2	-9.144843999999999	38.711663766898056	2	-9.144794584989706	38.71174160783219	0
1	ChIJFww3xX80GQ0RtGF1XxXZEbw	5	2	-9.144843999999999	38.711663766898056	2	-9.144415044127877	38.711473307207015	0
1	ChIJFww3xX80GQ0RtGF1XxXZEbw	5	2	-9.144843999999999	38.711663766898056	2	-9.14481083223881	38.711745660703166	0
1	ChIJFww3xX80GQ0RtGF1XxXZEbw	5	2	-9.144843999999999	38.711663766898056	2	-9.14499419455003	38.711436861481126	4
1	ChIJFww3xX80GQ0RtGF1XxXZEbw	5	2	-9.144843999999999	38.711663766898056	2	-9.144633835789348	38.711360288907436	15
1	ChIJFww3xX80GQ0RtGF1XxXZEbw	5	2	-9.144843999999999	38.711663766898056	2	-9.144650020613428	38.71167864189196	0
1	ChIJFww3xX80GQ0RtGF1XxXZEbw	5	2	-9.144843999999999	38.711663766898056	2	-9.144895837543947	38.71178339871943	0
1	ChIJFww3xX80GQ0RtGF1XxXZEbw	5	2	-9.144843999999999	38.711663766898056	2	-9.144813606495703	38.71160952908248	11
1	ChIJFww3xX80GQ0RtGF1XxXZEbw	5	2	-9.144843999999999	38.711663766898056	2	-9.144286445527689	38.71139561159489	0
1	ChIJFww3xX80GQ0RtGF1XxXZEbw	5	2	-9.144843999999999	38.711663766898056	2	-9.144784421192602	38.7118696719755	0
1	ChIJFww3xX80GQ0RtGF1XxXZEbw	5	2	-9.144843999999999	38.711663766898056	3	-9.144833220011545	38.71166803171518	19
1	ChIJFww3xX80GQ0RtGF1XxXZEbw	5	2	-9.144843999999999	38.711663766898056	3	-9.144908387323781	38.71168437809007	0
1	ChIJFww3xX80GQ0RtGF1XxXZEbw	5	2	-9.144843999999999	38.711663766898056	3	-9.14496883462873	38.711631675254466	16
1	ChIJFww3xX80GQ0RtGF1XxXZEbw	5	2	-9.144843999999999	38.711663766898056	3	-9.144927173754764	38.711748601630894	0
1	ChIJFww3xX80GQ0RtGF1XxXZEbw	5	2	-9.144843999999999	38.711663766898056	3	-9.145014920976077	38.7116130773748	16
1	ChIJFww3xX80GQ0RtGF1XxXZEbw	5	2	-9.144843999999999	38.711663766898056	3	-9.14495394979917	38.711693773218364	0
1	ChIJFww3xX80GQ0RtGF1XxXZEbw	5	2	-9.144843999999999	38.711663766898056	3	-9.144811133980463	38.711615853537495	11
1	ChIJFww3xX80GQ0RtGF1XxXZEbw	5	2	-9.144843999999999	38.711663766898056	3	-9.144847189839108	38.71168501899386	0
1	ChIJFww3xX80GQ0RtGF1XxXZEbw	5	2	-9.144843999999999	38.711663766898056	3	-9.144997635691555	38.71165779447221	0
1	ChIJFww3xX80GQ0RtGF1XxXZEbw	5	2	-9.144843999999999	38.711663766898056	3	-9.144846688268537	38.71169234847346	0
1	ChIJFww3xX80GQ0RtGF1XxXZEbw	5	3	-9.144555949247398	38.711663766544696	0	-9.144555949247398	38.711663766544696	0
1	ChIJFww3xX80GQ0RtGF1XxXZEbw	5	3	-9.144555949247398	38.711663766544696	0	-9.144555949247398	38.711663766544696	0
1	ChIJFww3xX80GQ0RtGF1XxXZEbw	5	3	-9.144555949247398	38.711663766544696	0	-9.144555949247398	38.711663766544696	0
1	ChIJFww3xX80GQ0RtGF1XxXZEbw	5	3	-9.144555949247398	38.711663766544696	0	-9.144555949247398	38.711663766544696	0
1	ChIJFww3xX80GQ0RtGF1XxXZEbw	5	3	-9.144555949247398	38.711663766544696	0	-9.144555949247398	38.711663766544696	0
1	ChIJFww3xX80GQ0RtGF1XxXZEbw	5	3	-9.144555949247398	38.711663766544696	0	-9.144555949247398	38.711663766544696	0
1	ChIJFww3xX80GQ0RtGF1XxXZEbw	5	3	-9.144555949247398	38.711663766544696	0	-9.144555949247398	38.711663766544696	0
1	ChIJFww3xX80GQ0RtGF1XxXZEbw	5	3	-9.144555949247398	38.711663766544696	0	-9.144555949247398	38.711663766544696	0
1	ChIJFww3xX80GQ0RtGF1XxXZEbw	5	3	-9.144555949247398	38.711663766544696	0	-9.144555949247398	38.711663766544696	0
1	ChIJFww3xX80GQ0RtGF1XxXZEbw	5	3	-9.144555949247398	38.711663766544696	0	-9.144555949247398	38.711663766544696	0
1	ChIJFww3xX80GQ0RtGF1XxXZEbw	5	3	-9.144555949247398	38.711663766544696	1	-9.144538225320659	38.71167229186428	0
1	ChIJFww3xX80GQ0RtGF1XxXZEbw	5	3	-9.144555949247398	38.711663766544696	1	-9.144550328583922	38.711676795771375	0
1	ChIJFww3xX80GQ0RtGF1XxXZEbw	5	3	-9.144555949247398	38.711663766544696	1	-9.144570042207388	38.71165033285523	0
1	ChIJFww3xX80GQ0RtGF1XxXZEbw	5	3	-9.144555949247398	38.711663766544696	1	-9.144554191198674	38.7116641837755	0
1	ChIJFww3xX80GQ0RtGF1XxXZEbw	5	3	-9.144555949247398	38.711663766544696	1	-9.144540355942686	38.71165547470931	0
1	ChIJFww3xX80GQ0RtGF1XxXZEbw	5	3	-9.144555949247398	38.711663766544696	1	-9.144571536233046	38.71166019148994	0
1	ChIJFww3xX80GQ0RtGF1XxXZEbw	5	3	-9.144555949247398	38.711663766544696	1	-9.144554426702129	38.711664524318856	0
1	ChIJFww3xX80GQ0RtGF1XxXZEbw	5	3	-9.144555949247398	38.711663766544696	1	-9.14455063083523	38.71165737968562	0
1	ChIJFww3xX80GQ0RtGF1XxXZEbw	5	3	-9.144555949247398	38.711663766544696	1	-9.144540464767857	38.71167137984304	0
1	ChIJFww3xX80GQ0RtGF1XxXZEbw	5	3	-9.144555949247398	38.711663766544696	1	-9.14453560842341	38.711666744846895	0
1	ChIJFww3xX80GQ0RtGF1XxXZEbw	5	3	-9.144555949247398	38.711663766544696	2	-9.144426739020144	38.711616445381644	0
1	ChIJFww3xX80GQ0RtGF1XxXZEbw	5	3	-9.144555949247398	38.711663766544696	2	-9.14389915121715	38.711185058391216	0
1	ChIJFww3xX80GQ0RtGF1XxXZEbw	5	3	-9.144555949247398	38.711663766544696	2	-9.144243154510685	38.712050819557476	0
1	ChIJFww3xX80GQ0RtGF1XxXZEbw	5	3	-9.144555949247398	38.711663766544696	2	-9.144592380925543	38.7113926335698	18
1	ChIJFww3xX80GQ0RtGF1XxXZEbw	5	3	-9.144555949247398	38.711663766544696	2	-9.144542949184006	38.71166790027829	0
1	ChIJFww3xX80GQ0RtGF1XxXZEbw	5	3	-9.144555949247398	38.711663766544696	2	-9.144520954762795	38.711702670037205	0
1	ChIJFww3xX80GQ0RtGF1XxXZEbw	5	3	-9.144555949247398	38.711663766544696	2	-9.1442476810822	38.71194047947683	0
1	ChIJFww3xX80GQ0RtGF1XxXZEbw	5	3	-9.144555949247398	38.711663766544696	2	-9.145083948615502	38.71135671124371	8
1	ChIJFww3xX80GQ0RtGF1XxXZEbw	5	3	-9.144555949247398	38.711663766544696	2	-9.14562106270636	38.7119089672688	0
1	ChIJFww3xX80GQ0RtGF1XxXZEbw	5	3	-9.144555949247398	38.711663766544696	2	-9.144781456028038	38.71165710059951	0
1	ChIJFww3xX80GQ0RtGF1XxXZEbw	5	3	-9.144555949247398	38.711663766544696	3	-9.144559245332324	38.71159304382179	0
1	ChIJFww3xX80GQ0RtGF1XxXZEbw	5	3	-9.144555949247398	38.711663766544696	3	-9.144562221742076	38.71163937515215	0
1	ChIJFww3xX80GQ0RtGF1XxXZEbw	5	3	-9.144555949247398	38.711663766544696	3	-9.144577354337843	38.711643777877505	0
1	ChIJFww3xX80GQ0RtGF1XxXZEbw	5	3	-9.144555949247398	38.711663766544696	3	-9.144370478355736	38.7115956152358	0
1	ChIJFww3xX80GQ0RtGF1XxXZEbw	5	3	-9.144555949247398	38.711663766544696	3	-9.14457040599418	38.71168542499773	0
1	ChIJFww3xX80GQ0RtGF1XxXZEbw	5	3	-9.144555949247398	38.711663766544696	3	-9.144645577300805	38.71162640094027	0
1	ChIJFww3xX80GQ0RtGF1XxXZEbw	5	3	-9.144555949247398	38.711663766544696	3	-9.144746329039851	38.71168995723452	0
1	ChIJFww3xX80GQ0RtGF1XxXZEbw	5	3	-9.144555949247398	38.711663766544696	3	-9.144503022343457	38.7116010186452	0
1	ChIJFww3xX80GQ0RtGF1XxXZEbw	5	3	-9.144555949247398	38.711663766544696	3	-9.144536450988298	38.711733647734086	0
1	ChIJFww3xX80GQ0RtGF1XxXZEbw	5	3	-9.144555949247398	38.711663766544696	3	-9.144365186762473	38.71155862042794	0
1	ChIJFww3xX80GQ0RtGF1XxXZEbw	5	4	-9.145132049846927	38.71143899964667	0	-9.145132049846927	38.71143899964667	13
1	ChIJFww3xX80GQ0RtGF1XxXZEbw	5	4	-9.145132049846927	38.71143899964667	0	-9.145132049846927	38.71143899964667	13
1	ChIJFww3xX80GQ0RtGF1XxXZEbw	5	4	-9.145132049846927	38.71143899964667	0	-9.145132049846927	38.71143899964667	13
1	ChIJFww3xX80GQ0RtGF1XxXZEbw	5	4	-9.145132049846927	38.71143899964667	0	-9.145132049846927	38.71143899964667	13
1	ChIJFww3xX80GQ0RtGF1XxXZEbw	5	4	-9.145132049846927	38.71143899964667	0	-9.145132049846927	38.71143899964667	13
1	ChIJFww3xX80GQ0RtGF1XxXZEbw	5	4	-9.145132049846927	38.71143899964667	0	-9.145132049846927	38.71143899964667	13
1	ChIJFww3xX80GQ0RtGF1XxXZEbw	5	4	-9.145132049846927	38.71143899964667	0	-9.145132049846927	38.71143899964667	13
1	ChIJFww3xX80GQ0RtGF1XxXZEbw	5	4	-9.145132049846927	38.71143899964667	0	-9.145132049846927	38.71143899964667	13
1	ChIJFww3xX80GQ0RtGF1XxXZEbw	5	4	-9.145132049846927	38.71143899964667	0	-9.145132049846927	38.71143899964667	13
1	ChIJFww3xX80GQ0RtGF1XxXZEbw	5	4	-9.145132049846927	38.71143899964667	0	-9.145132049846927	38.71143899964667	13
1	ChIJFww3xX80GQ0RtGF1XxXZEbw	5	4	-9.145132049846927	38.71143899964667	1	-9.145124056695638	38.71143387100103	11
1	ChIJFww3xX80GQ0RtGF1XxXZEbw	5	4	-9.145132049846927	38.71143899964667	1	-9.145114114509319	38.71143515342666	11
1	ChIJFww3xX80GQ0RtGF1XxXZEbw	5	4	-9.145132049846927	38.71143899964667	1	-9.14514328510607	38.71145568586447	14
1	ChIJFww3xX80GQ0RtGF1XxXZEbw	5	4	-9.145132049846927	38.71143899964667	1	-9.145144066059519	38.71141850608917	16
1	ChIJFww3xX80GQ0RtGF1XxXZEbw	5	4	-9.145132049846927	38.71143899964667	1	-9.145139526766274	38.71144025649982	14
1	ChIJFww3xX80GQ0RtGF1XxXZEbw	5	4	-9.145132049846927	38.71143899964667	1	-9.145130401668919	38.71145490241629	14
1	ChIJFww3xX80GQ0RtGF1XxXZEbw	5	4	-9.145132049846927	38.71143899964667	1	-9.145133658942965	38.711445281597236	14
1	ChIJFww3xX80GQ0RtGF1XxXZEbw	5	4	-9.145132049846927	38.71143899964667	1	-9.145119196683641	38.7114382537533	11
1	ChIJFww3xX80GQ0RtGF1XxXZEbw	5	4	-9.145132049846927	38.71143899964667	1	-9.145146102802205	38.711463033501836	14
1	ChIJFww3xX80GQ0RtGF1XxXZEbw	5	4	-9.145132049846927	38.71143899964667	1	-9.145131849217204	38.71143905983837	13
1	ChIJFww3xX80GQ0RtGF1XxXZEbw	5	4	-9.145132049846927	38.71143899964667	2	-9.145350382673794	38.71132109572139	0
1	ChIJFww3xX80GQ0RtGF1XxXZEbw	5	4	-9.145132049846927	38.71143899964667	2	-9.14567691777945	38.71104065343244	0
1	ChIJFww3xX80GQ0RtGF1XxXZEbw	5	4	-9.145132049846927	38.71143899964667	2	-9.14504596186453	38.7113377008727	10
1	ChIJFww3xX80GQ0RtGF1XxXZEbw	5	4	-9.145132049846927	38.71143899964667	2	-9.14524465629224	38.71137583079039	0
1	ChIJFww3xX80GQ0RtGF1XxXZEbw	5	4	-9.145132049846927	38.71143899964667	2	-9.144964733959101	38.71145318512939	4
1	ChIJFww3xX80GQ0RtGF1XxXZEbw	5	4	-9.145132049846927	38.71143899964667	2	-9.145232394957606	38.71140888973526	0
1	ChIJFww3xX80GQ0RtGF1XxXZEbw	5	4	-9.145132049846927	38.71143899964667	2	-9.144787095359927	38.711622962956426	12
1	ChIJFww3xX80GQ0RtGF1XxXZEbw	5	4	-9.145132049846927	38.71143899964667	2	-9.144651782258345	38.711621206316515	0
1	ChIJFww3xX80GQ0RtGF1XxXZEbw	5	4	-9.145132049846927	38.71143899964667	2	-9.144681880526202	38.71121129832853	0
1	ChIJFww3xX80GQ0RtGF1XxXZEbw	5	4	-9.145132049846927	38.71143899964667	2	-9.146187754952923	38.71154736969499	0
1	ChIJFww3xX80GQ0RtGF1XxXZEbw	5	4	-9.145132049846927	38.71143899964667	3	-9.145131471230876	38.71143764497303	13
1	ChIJFww3xX80GQ0RtGF1XxXZEbw	5	4	-9.145132049846927	38.71143899964667	3	-9.145123719906005	38.71143581759732	11
1	ChIJFww3xX80GQ0RtGF1XxXZEbw	5	4	-9.145132049846927	38.71143899964667	3	-9.14517102394291	38.71149832780761	0
1	ChIJFww3xX80GQ0RtGF1XxXZEbw	5	4	-9.145132049846927	38.71143899964667	3	-9.145129392866897	38.711440343983725	11
1	ChIJFww3xX80GQ0RtGF1XxXZEbw	5	4	-9.145132049846927	38.71143899964667	3	-9.145167044899136	38.711488168493986	0
1	ChIJFww3xX80GQ0RtGF1XxXZEbw	5	4	-9.145132049846927	38.71143899964667	3	-9.145130123149979	38.71144211279502	11
1	ChIJFww3xX80GQ0RtGF1XxXZEbw	5	4	-9.145132049846927	38.71143899964667	3	-9.145055217139411	38.71135841787843	8
1	ChIJFww3xX80GQ0RtGF1XxXZEbw	5	4	-9.145132049846927	38.71143899964667	3	-9.14514863574906	38.71142654115643	16
1	ChIJFww3xX80GQ0RtGF1XxXZEbw	5	4	-9.145132049846927	38.71143899964667	3	-9.145071290137292	38.71151124916242	12
1	ChIJFww3xX80GQ0RtGF1XxXZEbw	5	4	-9.145132049846927	38.71143899964667	3	-9.14520254620121	38.71142129498837	0
1	ChIJFww3xX80GQ0RtGF1XxXZEbw	5	5	-9.144843999999999	38.71143900000001	0	-9.144843999999999	38.71143900000001	1
1	ChIJFww3xX80GQ0RtGF1XxXZEbw	5	5	-9.144843999999999	38.71143900000001	0	-9.144843999999999	38.71143900000001	1
1	ChIJFww3xX80GQ0RtGF1XxXZEbw	5	5	-9.144843999999999	38.71143900000001	0	-9.144843999999999	38.71143900000001	1
1	ChIJFww3xX80GQ0RtGF1XxXZEbw	5	5	-9.144843999999999	38.71143900000001	0	-9.144843999999999	38.71143900000001	1
1	ChIJFww3xX80GQ0RtGF1XxXZEbw	5	5	-9.144843999999999	38.71143900000001	0	-9.144843999999999	38.71143900000001	1
1	ChIJFww3xX80GQ0RtGF1XxXZEbw	5	5	-9.144843999999999	38.71143900000001	0	-9.144843999999999	38.71143900000001	1
1	ChIJFww3xX80GQ0RtGF1XxXZEbw	5	5	-9.144843999999999	38.71143900000001	0	-9.144843999999999	38.71143900000001	1
1	ChIJFww3xX80GQ0RtGF1XxXZEbw	5	5	-9.144843999999999	38.71143900000001	0	-9.144843999999999	38.71143900000001	1
1	ChIJFww3xX80GQ0RtGF1XxXZEbw	5	5	-9.144843999999999	38.71143900000001	0	-9.144843999999999	38.71143900000001	1
1	ChIJFww3xX80GQ0RtGF1XxXZEbw	5	5	-9.144843999999999	38.71143900000001	0	-9.144843999999999	38.71143900000001	1
1	ChIJFww3xX80GQ0RtGF1XxXZEbw	5	5	-9.144843999999999	38.71143900000001	1	-9.144856351348919	38.71144242162088	1
1	ChIJFww3xX80GQ0RtGF1XxXZEbw	5	5	-9.144843999999999	38.71143900000001	1	-9.144837270559533	38.711436971192036	1
1	ChIJFww3xX80GQ0RtGF1XxXZEbw	5	5	-9.144843999999999	38.71143900000001	1	-9.144841016850986	38.71143975464107	1
1	ChIJFww3xX80GQ0RtGF1XxXZEbw	5	5	-9.144843999999999	38.71143900000001	1	-9.144843065669368	38.71143862486904	1
1	ChIJFww3xX80GQ0RtGF1XxXZEbw	5	5	-9.144843999999999	38.71143900000001	1	-9.144862337539607	38.71142754665733	1
1	ChIJFww3xX80GQ0RtGF1XxXZEbw	5	5	-9.144843999999999	38.71143900000001	1	-9.14484780941273	38.71144079725125	1
1	ChIJFww3xX80GQ0RtGF1XxXZEbw	5	5	-9.144843999999999	38.71143900000001	1	-9.1448603820768	38.71144034128522	1
1	ChIJFww3xX80GQ0RtGF1XxXZEbw	5	5	-9.144843999999999	38.71143900000001	1	-9.144843998588406	38.71141905925919	1
1	ChIJFww3xX80GQ0RtGF1XxXZEbw	5	5	-9.144843999999999	38.71143900000001	1	-9.144844674019	38.71143918007456	1
1	ChIJFww3xX80GQ0RtGF1XxXZEbw	5	5	-9.144843999999999	38.71143900000001	1	-9.144842654430242	38.711437537925136	1
1	ChIJFww3xX80GQ0RtGF1XxXZEbw	5	5	-9.144843999999999	38.71143900000001	2	-9.144797891688293	38.71151349786638	2
1	ChIJFww3xX80GQ0RtGF1XxXZEbw	5	5	-9.144843999999999	38.71143900000001	2	-9.144860618182678	38.711267530209454	9
1	ChIJFww3xX80GQ0RtGF1XxXZEbw	5	5	-9.144843999999999	38.71143900000001	2	-9.145172856568255	38.71101063128831	0
1	ChIJFww3xX80GQ0RtGF1XxXZEbw	5	5	-9.144843999999999	38.71143900000001	2	-9.145209578409784	38.711419443701615	0
1	ChIJFww3xX80GQ0RtGF1XxXZEbw	5	5	-9.144843999999999	38.71143900000001	2	-9.145109084378364	38.71152511865352	15
1	ChIJFww3xX80GQ0RtGF1XxXZEbw	5	5	-9.144843999999999	38.71143900000001	2	-9.145183999344223	38.71145347887674	0
1	ChIJFww3xX80GQ0RtGF1XxXZEbw	5	5	-9.144843999999999	38.71143900000001	2	-9.144896124876759	38.71143673789145	2
1	ChIJFww3xX80GQ0RtGF1XxXZEbw	5	5	-9.144843999999999	38.71143900000001	2	-9.144841342496472	38.71145189359102	1
1	ChIJFww3xX80GQ0RtGF1XxXZEbw	5	5	-9.144843999999999	38.71143900000001	2	-9.14489242938958	38.71137915696522	2
1	ChIJFww3xX80GQ0RtGF1XxXZEbw	5	5	-9.144843999999999	38.71143900000001	2	-9.14486068089971	38.711419859953224	1
1	ChIJFww3xX80GQ0RtGF1XxXZEbw	5	5	-9.144843999999999	38.71143900000001	3	-9.144788037127913	38.711412823454914	3
1	ChIJFww3xX80GQ0RtGF1XxXZEbw	5	5	-9.144843999999999	38.71143900000001	3	-9.144869630168017	38.7114110464829	1
1	ChIJFww3xX80GQ0RtGF1XxXZEbw	5	5	-9.144843999999999	38.71143900000001	3	-9.144836372699464	38.71143525111161	1
1	ChIJFww3xX80GQ0RtGF1XxXZEbw	5	5	-9.144843999999999	38.71143900000001	3	-9.144817300308407	38.71142480794143	1
1	ChIJFww3xX80GQ0RtGF1XxXZEbw	5	5	-9.144843999999999	38.71143900000001	3	-9.144805019778632	38.71147506331366	1
1	ChIJFww3xX80GQ0RtGF1XxXZEbw	5	5	-9.144843999999999	38.71143900000001	3	-9.144834580571004	38.71143159930266	1
1	ChIJFww3xX80GQ0RtGF1XxXZEbw	5	5	-9.144843999999999	38.71143900000001	3	-9.144845408101316	38.71143923096092	1
1	ChIJFww3xX80GQ0RtGF1XxXZEbw	5	5	-9.144843999999999	38.71143900000001	3	-9.144874462301049	38.711450643073924	1
1	ChIJFww3xX80GQ0RtGF1XxXZEbw	5	5	-9.144843999999999	38.71143900000001	3	-9.144750771123919	38.71150974207915	4
[truncated: 12,401 more rows]
